**Subgrouping School-Aged Children with Autism Spectrum Disorder Based on Co-Occurring  
Psychopathology**

Antonia M. H. Piergies<sup>a†</sup>, Tomoya Hirota<sup>a</sup>, Rei Monden<sup>b,c</sup>, Shuting Zheng<sup>a</sup>

<sup>a</sup>Department of Psychiatry and Behavior Sciences, Weill Institute for Neurosciences, University of California, San Francisco, 401 Parnassus Ave, San Francisco, CA, 94143, USA; [piergiestonya@gmail.com](mailto:piergiestonya@gmail.com) (A. M. H. P.); [tomoya.hirota@ucsf.edu](mailto:tomoya.hirota@ucsf.edu) (T. H.); [shuting.zheng@ucsf.edu](mailto:shuting.zheng@ucsf.edu) (S. Z.)

<sup>b</sup>Department of Biomedical Statistics, Graduate School of Medicine, Osaka University, 2-2; Yamadaoka, Suita, Osaka, 565-0871, Japan; [mondn@biostat.med.osaka-u.ac.jp](mailto:mondn@biostat.med.osaka-u.ac.jp) (R. M.)

<sup>c</sup>University of Groningen, University Medical Center Groningen, Interdisciplinary Center Psychopathology and Emotion Regulation (ICPE), Hanzeplein 1, 9713 GZ Groningen, Netherlands

<sup>†</sup>Corresponding author

## SUBGROUPING BASED ON CO-OCCURRING PSYCHOPATHOLOGY

2

### Abstract

**Background:** Symptom heterogeneity within autism spectrum disorder (ASD) is compounded by co-occurring psychopathology. Considering that some psychiatric disorders present together more often than others, deriving subgroups of individuals with ASD based on co-occurring psychopathology could better our understanding of symptom patterns existing within this population. This study's purpose was to derive subgroups of school-aged children with ASD based on co-occurring psychopathology while controlling for age and sex and to examine correlates of subgroup membership. **Method:** Six latent class models were estimated with a sample from the Simons Simplex Collection ( $n = 2,092$ ), using dichotomized categories (borderline/clinical versus normal range) from five of the DSM-Oriented Scales of the Child Behavior Checklist for Ages 6 to 18 as indicator variables. We evaluated the predictive value of intellectual disability and three groups of medical conditions—allergies/autoimmune disorders, gastrointestinal disorders, and neurological disorders—on subgroup membership using multinomial logistic regression. **Results:** Four subgroups emerged based on the combined presence/absence of psychiatric symptoms: “Low Psychopathology,” “Externalizing Problems,” “Internalizing Problems,” and “High Psychopathology.” Gastrointestinal disorders, the strongest predictor, was associated with increased odds of belonging to the “Externalizing Problems,” “Internalizing Problems,” and “High Psychopathology” subgroups over the “Low Psychopathology” subgroup, whereas intellectual disability was associated with decreased odds. Neurological disorders was also associated with increased odds of belonging to the “Internalizing Problems” and “High Psychopathology” subgroups. **Conclusion:** Patterns of psychopathology exist within school-aged children with ASD and are correlated with intellectual disability as well as specific medical conditions, providing guidance for clinical practice and etiology-driven research.

*Keywords:* autism spectrum disorder, latent class analysis, co-occurring psychopathology, intellectual disability, medical conditions

## **Introduction**

Co-occurring psychopathology is prevalent among children with autism spectrum disorder (ASD; Rosen et al., 2018), with about 70-91% meeting diagnostic criteria for at least one psychiatric disorder at some point during their lifetimes (Leyfer et al., 2006; Simonoff et al., 2008; Salazar et al., 2015; Mosner et al., 2019). Common co-occurring psychiatric disorders include anxiety disorders, attention-deficit/hyperactivity disorder (ADHD), depressive disorders, obsessive-compulsive disorder (OCD), and oppositional defiant disorder (ODD; Simonoff et al., 2008; Gjevik et al., 2011; Lai et al., 2019).

The presence of psychiatric disorders has been linked to increased impairments in adaptive, social, and academic functioning (Kim et al., 2000; Sikora et al., 2012; Kaat et al., 2013). For example, compared to children with ASD alone, children with ASD and ADHD present with greater attention and social deficits (Sinzig et al., 2008; Sprenger et al., 2013), and those with an anxiety or a depressive disorder present with more restricted/repetitive behaviors and social withdrawal (Chandrasekhar & Sikich, 2015; Muskett et al., 2019). Moreover, co-occurring psychopathology adds challenges to, and can delay, the diagnosis of ASD (Levy et al., 2010; Rosen et al., 2018). Such delay could be due to measurement-related challenges, which arise when trying to differentiate between core ASD symptoms and overlapping symptoms of co-occurring psychiatric disorders. In line with this hypothesis, the presence of internalizing and externalizing problems—symptoms that are internally- (e.g., anxiety problems) and externally-driven (e.g., conduct problems), respectively—has been shown to impact the sensitivity and specificity of commonly-used ASD symptom measures, including the Autism Diagnostic Interview-Revised (ADI-R), the Autism Diagnostic Observation Schedule (ADOS), the Modified Checklist for Autism in Toddlers (MCHAT), and the Social Responsiveness Scale (SRS; Havdahl et al., 2016; Colombi et al., 2019; Christopher et al., 2020).

Taken together, co-occurring psychopathology further complicates the phenotypic heterogeneity of ASD. Given that some psychiatric disorders are more likely to present together in the same child than others—for example, an ADHD diagnosis is often accompanied by diagnoses of an anxiety disorder, a mood disorder, or ODD (Gadow et al., 2008a; Gordon-Lipkin et al., 2018)—deriving subgroups based on co-occurring psychopathology could facilitate the identification of psychiatric disorders in children with ASD and the establishment of personalized treatment strategies for this population. One useful technique

## **SUBGROUPING BASED ON CO-OCCURRING PSYCHOPATHOLOGY**

4

for deriving subgroups based on observed categorical data is latent class analysis (LCA; Porcu & Giambona, 2017), which several studies have used in an attempt to disentangle the heterogeneity of ASD. One such study used core ASD symptoms as indicator variables in its models to derive two- to three-class solutions (Harris et al., 2021), while two other studies derived six-class solutions based on the Adult Autism Spectrum Quotient and the Child and Adolescent Symptom Inventory-4R (James et al., 2016; Kim et al., 2019). Although these studies have demonstrated the potential for identifying more homogeneous ASD subgroups, no study has systematically examined psychopathology-based subgroups in school-aged children with ASD.

The presentation of co-occurring psychopathology in children with ASD is complex and can be influenced by various factors, such as medical history and cognitive ability. It is estimated that 10-77% of children with ASD have a co-occurring medical condition, with gastrointestinal disorders, neurological disorders, and allergies/autoimmune disorders being among the most common (Muskens, et al., 2017). The presence of medical conditions, especially gastrointestinal and neurological disorders, has been positively associated with internalizing and externalizing problems in children with ASD (Gadow et al., 2008b; Simonoff et al., 2008; Mannion & Leader, 2013; Mazefsky et al., 2014; Fulceri et al., 2016; Weber & Gadow, 2017; Restrepo et al., 2020). However, several studies have not found significant associations between medical conditions (e.g., allergies/autoimmune disorders) and co-occurring psychopathology in children with ASD (Ming et al., 2008; Weber & Gadow, 2017). Cognitive ability can also influence the presentation of co-occurring psychopathology in children with ASD. Some studies show that children with ASD and intellectual disability (ID) experience more anxiety and exhibit more challenging behaviors (Bradley et al., 2004; O'Brien & Pearson, 2004; Murphy et al., 2009), while others suggest more internalizing and externalizing problems in those with IQs over 70 (Gadow et al., 2005; Gadow et al., 2008b; van Steensel et al. 2011; Gjevik et al., 2011; Strang et al., 2012). Considering these mixed findings, more research is needed to investigate the relationship between child-level factors (e.g., medical history and cognitive ability) and co-occurring psychopathology, especially that in the form of psychopathology-based subgroups. In addition, age and sex have been shown to differentially affect the presentation of co-occurring psychopathology in children with ASD. For example, older children appear to be at higher risk for internalizing and externalizing problems than younger children (Fodstad et al., 2010;

## SUBGROUPING BASED ON CO-OCCURRING PSYCHOPATHOLOGY

5

Salazar et al., 2015; Soke et al., 2018). Meanwhile, more internalizing problems are reported in females, and more externalizing problems are reported in males (Giarelli et al. 2010; Solomon et al., 2012; Salazar et al., 2015). These studies imply that age and sex should be carefully considered and controlled during investigations of co-occurring psychopathology in children with ASD.

The purpose of this study was to derive subgroups of school-aged children with ASD based on co-occurring psychopathology—psychiatric symptoms that surpass cutoffs on the Child Behavior Checklist for Ages 6 to 18 (CBCL 6/18)—while controlling for age and sex and to use multinomial logistic regression to examine predictors of subgroup membership, focusing on the presence of ID and three groups of medical conditions: allergies/autoimmune disorders, gastrointestinal disorders, and neurological disorders.

### Methods

#### Participants

Data were obtained from the Simons Simplex Collection (SSC; version 15). The data collection process has been described in detail elsewhere (Fischbach & Lord, 2010) and briefly summarized below. Phenotypic data were collected over a six-month period from more than 2,700 families, each composed of a single child with ASD (i.e., the proband), their unaffected parents, and their unaffected sibling(s). To be included in the SSC, probands needed to be English-speaking, older than four years old, and younger than 18 years old. They also needed to have a best-estimate diagnosis of ASD and surpass designated cutoffs on the ADI-R, the ADOS, and a measure of nonverbal cognitive ability. Informed consent was obtained at each data collection site included in the SSC.

Figure 1 illustrates the participant selection process for all analyses. Our original analytic sample consisted of 2,184 school-aged children with ASD who had a CBCL/6-18. For the LCA, 92 (4.21%) of the participants were excluded because they had missing indicator variable data and/or covariate data (described below), resulting in a sample of 2,092 (95.79%) children. Further, seven (0.33% of 2,092) participants from the LCA sample were excluded from the multinomial logistic regression due to missing medical history data, resulting in a sample of 2,085 children. An additional 16 (0.77% of 2,085) participants were excluded from this analysis because they were considered outliers, having standardized residuals  $> |2|$  and therefore violating the assumptions of multinomial logistic regression. Thus, the final

## **SUBGROUPING BASED ON CO-OCCURRING PSYCHOPATHOLOGY**

6

sample consisted of 2,069 children. Of note, when outliers were included in the multinomial logistic regression, parameter estimates were similar (Supplementary Table 4).

### **Measures**

#### ***Indicator Variables***

The presence of co-occurring psychopathology was determined using the DSM-Oriented Scales of the caregiver-report form of the CBCL/6-18, which measure symptoms of psychiatric disorders. The scales are comprised of items that describe specific problem behaviors and are first rated 0 (not true) to 2 (often or very true) by caregivers and then assigned *T*-scores based on raw score totals. Although the DSM-Oriented Scales are dimensional measures of symptom levels, for the purpose of the current analysis, we adopted binary categories based on the recommended cutoffs separating the borderline/clinical (elevated levels of psychopathology defined by *T*-scores  $\geq 65$ ) and normal ranges (absence of psychopathology defined by *T*-scores  $< 65$ ) (Achenbach & Rescorla, 2001). We estimated latent class models using five of the six DSM-Oriented Scales: ADHD Problems, Affective Problems, Anxiety Problems, Conduct Problems, and Oppositional Defiant Problems. We excluded the Somatic Problems scale from our analysis given previously-reported concerns around its psychometric properties (Ebesutani et al., 2009) and its overlap with other scales. We also conducted sensitivity tests, using all six scales as indicator variables in our LCA and found little added value when the Somatic Problems scale was included (Supplementary Table 1; Supplementary Figure 1). Additionally, we observed substantial agreement between class assignments from LCAs with and without the Somatic Problems scale ( $\kappa > 0.70$ ) (Cohen, 1960).

#### ***Predictor Variables***

The presence of ID was approximated as having a nonverbal IQ under 70 (Shree & Shukla, 2016), which is consistent with other studies evaluating the relationship between co-occurring psychopathology and ID in children with ASD (e.g., Gadow et al., 2016). Nonverbal IQ was assessed using one of four measures included in the SSC data collection process, the Mullen Scales of Early Learning, the Differential Ability Scales-II, the Wechsler Intelligence Scale for Children-IV, or the Wechsler Abbreviated Scale of Intelligence (Mullen, 1995; Wechsler, 1999; Wechsler, 2003; Elliott, 2007).

## **SUBGROUPING BASED ON CO-OCCURRING PSYCHOPATHOLOGY**

7

Information about medical history was obtained from the SSC's medical history form, indicating whether or not participants had ever had a given condition, as reported by their caregiver(s). We grouped conditions into larger categories based on the organization of the SSC's medical history form and a previous study (Croen et al., 2015; Supplementary Tables 2 and 3). While we started with nine groups in total—"Allergies/Autoimmune Disorders," "Cancer," "Chronic Illnesses," "Diseases & Surgeries," "Gastrointestinal Disorders," "Genetic Disorders," "Hearing and Vision Problems," "Heart Disease," and "Neurological Disorders"—we ultimately included the three that were most relevant to co-occurring psychopathology in children with ASD based on a previous study (Muskens et al., 2017; see Supplementary Table 2 for each group's endorsement rate). The variables representing these three groups were coded dichotomously, with 1 indicating that a participant had a history of at least one of the conditions within the category (i.e., responses of "true" or "yes" on the SSC's medical history form) and 0 indicating that a participant did not have a history of any condition within the category (i.e., responses of "false" or "no" on the SSC's medical history form). Ambiguous responses, such as "not sure" or "suspected," were also coded as 0. If all the conditions in the category were missing responses, the category was coded as "NA." The conditions in all three groups are displayed in Supplementary Table 3.

### **Statistical Analyses**

LCA was performed in R (version 4.0.4) using the polCA package (Linzer & Lewis, 2013). Latent class models with one through six classes were estimated based on five binary indicator variables: ADHD problems, affective problems, anxiety problems, conduct problems, and oppositional defiant problems. Age and sex were included in the models as covariates. Comparisons between models were made using goodness-of-fit criteria, specifically the Akaike information criterion (AIC), Bayesian information criterion (BIC), and entropy. Lower AIC and BIC values and higher entropy values indicate better model fit. Models were also evaluated for interpretability (i.e., whether the derived classes were clinically relevant and distinguishable). Posterior probabilities were used to assign participants to their most likely class. Multinomial logistic regression was performed in SPSS (version 27; IBM Corporation, Armonk, NY) to investigate whether the derived classes could be predicted by four variables: ID, allergies/autoimmune disorders, gastrointestinal disorders, or neurological disorders. Residual analysis was used to check relevant assumptions: linearity, normality, and homogeneity of variance. Multicollinearity was checked

## SUBGROUPING BASED ON CO-OCCURRING PSYCHOPATHOLOGY

8

using Cramer's V. All the scripts used to run the analyses can be found here:

[https://osf.io/xyvc2/?view\\_only=736ea37d02404383bc9125745e3c2391](https://osf.io/xyvc2/?view_only=736ea37d02404383bc9125745e3c2391).

### Results

For the entire LCA sample ( $n = 2,092$ ), the mean age was 123.5 months ( $SD = 37.53$ ) and 1,811 (86.57%) participants were male (Table 1). Additionally, the sample included 517 participants (24.71%) who had ID, 992 (47.42%) who had histories of at least one allergy/autoimmune disorder, 995 (47.56%) who had histories of at least one gastrointestinal disorder, and 1,158 (55.35%) who had histories of at least one neurological disorder.

[INSERT TABLE 1]

### Latent Class Analysis

The results of the LCA (Table 2) showed that a four-class model was optimal, with the smallest AIC and BIC. None of the entropy values were close to zero, indicating that classes were well-separated (Ramaswamy et al., 1993). The four-class model (Figure 2) showed clear differentiation between co-occurring psychopathology patterns among children and adolescents with ASD, the characteristics of which are summarized in Table 3. The “Low Psychopathology” subgroup was characterized by the lowest percentage of participants with borderline/clinical levels of all problems. Compared to the “Low Psychopathology” subgroup, the “Externalizing Problems” subgroup had more participants with borderline/clinical levels of all problems, mainly ADHD, conduct, and oppositional defiant problems. The “Internalizing Problems” subgroup had fewer participants with borderline/clinical levels of ADHD, conduct, and oppositional defiant problems but more participants with borderline/clinical levels of affective and anxiety problems than the “Externalizing Problems” subgroup. The “High Psychopathology” subgroup was characterized by the highest percentage of participants with borderline/clinical levels of all problems.

[INSERT TABLE 2]

[INSERT FIGURE 2]

### Multinomial Logistic Regression

The results of the multinomial logistic regression are presented in Table 3. Comparisons were made using the “Low Psychopathology” subgroup as the reference. ID, gastrointestinal disorders, and neurological disorders were all found to be significant predictors of subgroup membership ( $p < .001$ ),



## SUBGROUPING BASED ON CO-OCCURRING PSYCHOPATHOLOGY

9

while allergies/autoimmune disorders was not identified as a statistically significant predictor.

Gastrointestinal disorders was the strongest predictor of belonging to all three subgroups characterized by borderline/clinical levels of problems. Relative to the “Low Psychopathology” subgroup, children with histories of at least one gastrointestinal disorder were more likely to belong to the “Externalizing Problems” (OR = 1.481,  $p = .009$ ), “Internalizing Problems” (OR = 1.517,  $p < .001$ ), and “High Psychopathology” (OR = 1.814,  $p < .001$ ) subgroups, whereas children with ID were less likely to belong to these subgroups (OR = .709,  $p = .049$ ; OR = .661,  $p < .001$ ; OR = .537,  $p < .001$ ). Children with histories of at least one neurological disorder were more likely to belong to the “Internalizing Problems” (OR = 1.368,  $p = .003$ ) and “High Psychopathology” (OR = 1.802,  $p < .001$ ) subgroups than the “Low Psychopathology” subgroup.

[INSERT TABLE 3]

### Discussion and Implications

#### Discussion

The current study aimed to use LCA to derive subgroups of school-aged children with ASD based on co-occurring psychopathology while controlling for age and sex and to use multinomial logistic regression to determine predictors of subgroup membership, focusing on the presence of ID and three groups of medical conditions. Using LCA, we derived four subgroups, characterized by low psychopathology, externalizing problems, internalizing problems, and high psychopathology.

While this is the first study to use LCA to derive psychopathology-based subgroups in this population, Nordahl and colleagues (2020) conducted latent profile analysis on a sample of preschool-aged children with ASD using continuous symptom-level data from the CBCL/1.5-5's DSM-Oriented Scales. Their findings, similar to the findings reported here, revealed subgroups characterized by high and low levels of psychopathology. Interestingly, in our sample, we found two additional patterns of psychopathology, in which internalizing and externalizing problems clustered separately. It could be that more unique patterns of psychopathology emerge later in development, as children undergo physio-psychological changes and experience a myriad of social-environmental exposures. In support of this idea, another LCA study, which used clinically-referred and general-population samples of school-aged children, identified four psychopathology-based subgroups resembling ours (Bianchi et al., 2017).

## SUBGROUPING BASED ON CO-OCCURRING PSYCHOPATHOLOGY

Additionally, using multinomial logistic regression, we found that subgroup membership was significantly associated with having a history of at least one gastrointestinal disorder and a history of at least one neurological disorder but not a history of at least one allergy/autoimmune disorder. This finding complements other studies in the literature that have found a relationship between these medical conditions and any one psychiatric disorder in children with ASD by adding a novel contribution: demonstrating that a history of these medical conditions predicts unique patterns of the combined presence/absence of psychiatric symptoms. Our findings are consistent with two studies on how these conditions affect both internalizing and externalizing problems in children with ASD. The first study found more anxiety problems, externalizing problems, and total problems in young children with gastrointestinal symptoms compared to those without symptoms (Fulceri et al., 2016), which is consistent with our finding that having a history of at least one gastrointestinal disorder increases one's likelihood of belonging to the "Externalizing Problems," "Internalizing Problems," and "High Psychopathology" subgroups as compared to the "Low Psychopathology" subgroup. The second study found that having epilepsy, one of the neurological disorders included in our study, resulted in an increased likelihood of having the psychiatric disorders that correspond to our "Externalizing Problems" and "High Psychopathology" subgroups (i.e., ADHD, oppositional defiant or conduct disorder, and any emotional disorder; Simonoff et al., 2008). However, in this study, having a history of at least one neurological disorder increased one's likelihood of belonging to the "Internalizing Problems" and "High Psychopathology" subgroups but not the "Externalizing Problems" subgroup. One possible explanation for this discrepancy is that we included a broader range of neurological disorders (16 conditions, Supplementary Table 3), whereas Simonoff and colleagues focused solely on epilepsy.

ID was also significantly associated with subgroup membership. Specifically, we found that children with ID (IQ under 70) were less likely to belong to the "Externalizing Problems," "Internalizing Problems" and "High Psychopathology" subgroups than the "Low Psychopathology" subgroup, which is consistent with previous studies showing that individuals with ASD and IQs over 70, compared to under 70, are at greater risk for anxiety and depression (Lecavalier, 2006; Hallett et al., 2013a; Sukhodolsky et al. 2008; Mazurek & Kanne 2010). It is possible that lack of emotional insight or difficulties communicating mental states results in an underestimation of psychiatric symptoms in children with ASD and ID (Simonoff et al.,

## **SUBGROUPING BASED ON CO-OCCURRING PSYCHOPATHOLOGY**

11

2008; van Steensel et al., 2017). It is also important to consider whether the measures currently used to assess psychopathology in this population are accurately capturing psychiatric symptoms, as the directionality of the relationship between IQ and psychopathology appears to be informant-dependent (Gadow et al., 2008b; Hallet et al., 2013b). Nonetheless, it is crucial that we better understand the mental health of children with ASD who have lower IQs.

Our study has several limitations. First, we used a categorical framework to conceptualize psychopathology. Though dichotomizing a dimensional measure (i.e., the DSM-Oriented Scales) likely resulted in the loss of information on symptom levels, we chose to do so in order to make our findings more relevant to clinical practice. Second, the cross-sectional nature of the SSC sample does not allow for the evaluation of causal relationships between our predictor variables and psychopathology-based subgroups. Such relationship is likely bidirectional and warrants longitudinal investigation. Third, given the nature of the SSC sample and LCA, our findings may not be generalizable to the broader population of children with ASD. However, our large sample size (over 2,000 individuals with ASD) and use of age and sex as covariates add to the strengths of our study, which was effective at capturing the individual profiles of co-occurring psychopathology that exist within our sample.

### **Implications**

The findings of this study have important implications for clinical practice and research. First, the four subgroups derived from our sample demonstrate a need for clinicians to be cognizant of co-occurring internalizing and externalizing problems in school-aged children with ASD and the potential impact of these psychiatric symptoms on diagnostic tools used to identify ASD. In other words, when a clinician is evaluating a school-aged child for ASD, it is possible that the child will be exhibiting certain patterns of co-occurring psychopathology that could affect their interpretation of ASD symptom measures. Our findings also reinforce the need for multidisciplinary services in this population, suggesting that non-ASD specialists (e.g., primary care physicians) consider co-occurring psychopathology when they are providing care for children with ASD. For example, when seeing a child with ASD who struggles with gastrointestinal symptoms, a pediatrician may want to collaborate with a mental health provider, as children with gastrointestinal disorders could be at increased risk for co-occurring psychopathology. Psychopathology-based subgroups also affect responses to intervention and should be carefully

## **SUBGROUPING BASED ON CO-OCCURRING PSYCHOPATHOLOGY**

12

considered in the development of intervention guidelines, which are currently broad (i.e., non-specific to subpopulations), and future studies (Antshel et al., 2011; McBride et al., 2020; Dekker et al., 2021; Wickstrom et al., 2021). Finally, the findings of this study provide additional rationale to investigate the shared mechanisms of psychiatric and medical conditions. The subgroups derived in this study should be carefully considered when generating hypotheses for etiology-driven research. In conclusion, our findings indicate that psychopathology-based subgroups can exist within school-aged children with ASD and can be predicted by ID and medical conditions. To improve the ways in which we support children with ASD and co-occurring psychopathology, we argue that professionals should go beyond the diagnosis of ASD and consider an individual's compressive symptom profile when diagnosing, treating, and researching this population.

### **Acknowledgements**

Dr. Monden was partially supported by the Clinical Investigator's Research Project at Osaka University's Graduate School of Medicine. Many thanks to Drs. Caroline Lew and Jordan Wickstrom for their valuable feedback on drafts. We are grateful to all of the families at the participating Simons Simplex Collection (SSC) sites, as well as the principal investigators (A. Beaudet, R. Bernier, J. Constantino, E. Cook, E. Fombonne, D. Geschwind, R. Goin-Kochel, E. Hanson, D. Grice, A. Klin, D. Ledbetter, C. Lord, C. Martin, D. Martin, R. Maxim, J. Miles, O. Ousley, K. Pelphrey, B. Peterson, J. Piggot, C. Saulnier, M. State, W. Stone, J. Sutcliffe, C. Walsh, Z. Warren, E. Wijsman). We also appreciate obtaining access to phenotypic data on SFARI Base. Approved researchers can obtain the SSC population datasets described in this study by applying at <https://base.sfari.org>.

### **Conflicts of Interest**

There are no conflicts of interest for the authors to disclose.

**References**

- Achenbach, T. M. (2011). Child Behavior Checklist. In J. S. Kreutzer, J. DeLuca, & B. Caplan (Eds.), *Encyclopedia of Clinical Neuropsychology* (pp. 546–552). Springer New York.  
[https://doi.org/10.1007/978-0-387-79948-3\\_1529](https://doi.org/10.1007/978-0-387-79948-3_1529)
- Antshel, K. M., Polacek, C., McMahon, M., Dygert, K., Spenceley, L., Dygert, L., Miller, L., & Faisal, F. (2011). Comorbid ADHD and Anxiety Affect Social Skills Group Intervention Treatment Efficacy in Children With Autism Spectrum Disorders. *Journal of Developmental & Behavioral Pediatrics, 32*(6), 439–446. <https://doi.org/10.1097/DBP.0b013e318222355d>
- Bianchi, V., Brambilla, P., Garzitto, M., Colombo, P., Fornasari, L., Bellina, M., Bonivento, C., Tesei, A., Piccin, S., Conte, S., Perna, G., Frigerio, A., Castiglioni, I., Fabbro, F., Molteni, M., & Nobile, M. (2017). Latent classes of emotional and behavioural problems in epidemiological and referred samples and their relations to DSM-IV diagnoses. *European Child & Adolescent Psychiatry, 26*(5), 549–557.  
<https://doi.org/10.1007/s00787-016-0918-2>
- Bohman, H., Jonsson, U., Von Knorring, A.-L., Von Knorring, L., Päären, A., & Olsson, G. (2010). Somatic symptoms as a marker for severity in adolescent depression: Somatic adolescent depression. *Acta Paediatrica, 99*(11), 1724–1730. <https://doi.org/10.1111/j.1651-2227.2010.01906.x>
- Bradley, E. A., Summers, J. A., Wood, H. L., & Bryson, S. E. (2004). Comparing Rates of Psychiatric and Behavior Disorders in Adolescents and Young Adults with Severe Intellectual Disability with and without Autism. *Journal of Autism and Developmental Disorders, 34*(2), 151–161.  
<https://doi.org/10.1023/B:JADD.0000022606.97580.19>
- Chandrasekhar, T., & Sikich, L. (2015). Challenges in the diagnosis and treatment of depression in autism spectrum disorders across the lifespan. *Dialogues in Clinical Neuroscience, 17*(2), 219–227.  
<https://www.ncbi.nlm.nih.gov/pmc/articles/PMC4518704/>
- Christopher, K., Bishop, S., Carpenter, L. A., Warren, Z., & Kanne, S. (2021). The Implications of Parent-Reported Emotional and Behavioral Problems on the Modified Checklist for Autism in Toddlers. *Journal of Autism and Developmental Disorders, 51*(3), 884–891. <https://doi.org/10.1007/s10803-020-04469-5>
- Cohen, J. (1960). A Coefficient of Agreement for Nominal Scales. *Educational and Psychological Measurement, 20*(1), 37–46. <https://doi.org/10.1177/001316446002000104>

## SUBGROUPING BASED ON CO-OCCURRING PSYCHOPATHOLOGY

14

- Colombi, C., Fish, A., & Ghaziuddin, M. (2020). Utility of the ADOS-2 in children with psychiatric disorders. *European Child & Adolescent Psychiatry*, 29(7), 989–992. <https://doi.org/10.1007/s00787-019-01411-8>
- Croen, L. A., Zerbo, O., Qian, Y., Massolo, M. L., Rich, S., Sidney, S., & Kripke, C. (2015). The health status of adults on the autism spectrum. *Autism*, 19(7), 814–823. <https://doi.org/10.1177/1362361315577517>
- de Bildt, A., Sytema, S., Kraijer, D., Sparrow, S., & Minderaa, R. (2005). Adaptive functioning and behaviour problems in relation to level of education in children and adolescents with intellectual disability. *Journal of Intellectual Disability Research*, 49(9), 672–681. <https://doi.org/10.1111/j.1365-2788.2005.00711.x>
- Dekker, V., Nauta, M. H., Timmerman, M. E., Mulder, E. J., Hoekstra, P. J., & de Bildt, A. (2021). Application of Latent Class Analysis to Identify Subgroups of Children with Autism Spectrum Disorders who Benefit from Social Skills Training. *Journal of Autism and Developmental Disorders*, 51(6), 2004–2018. <https://doi.org/10.1007/s10803-020-04678-y>
- Ebesutani, C., Bernstein, A., Nakamura, B. J., Chorpita, B. F., Higa-McMillan, C. K., & Weisz, J. R. (2010). Concurrent Validity of the Child Behavior Checklist DSM-Oriented Scales: Correspondence with DSM Diagnoses and Comparison to Syndrome Scales. *Journal of Psychopathology and Behavioral Assessment*, 32(3), 373–384. <https://doi.org/10.1007/s10862-009-9174-9>
- Elliott, C. D. (2007). "Differential Ability Scales" (2nd Ed.). San Antonio, TX: Harcourt Assessment
- Fischbach, G. D., & Lord, C. (2010). The Simons Simplex Collection: A Resource for Identification of Autism Genetic Risk Factors. *Neuron*, 68(2), 192–195. <https://doi.org/10.1016/j.neuron.2010.10.006>
- Fodstad, J. C., Rojahn, J., & Matson, J. L. (2010). Emergent Comorbidity in At Risk Children with and without Autism Spectrum Disorder—A Cross-Sectional Study. *Journal of Developmental and Physical Disabilities*, 22(4), 381–400. <https://doi.org/10.1007/s10882-010-9202-4>
- Fulceri, F., Morelli, M., Santocchi, E., Cena, H., Del Bianco, T., Narzisi, A., Calderoni, S., & Muratori, F. (2016). Gastrointestinal symptoms and behavioral problems in preschoolers with Autism Spectrum Disorder. *Digestive and Liver Disease*, 48(3), 248–254. <https://doi.org/10.1016/j.dld.2015.11.026>
- Gadow, K. D., DeVincent, C. J., & Drabick, D. A. G. (2008a). Oppositional Defiant Disorder as a Clinical Phenotype in Children with Autism Spectrum Disorder. *Journal of Autism and Developmental Disorders*, 38(7), 1302–1310. <https://doi.org/10.1007/s10803-007-0516-8>

## SUBGROUPING BASED ON CO-OCCURRING PSYCHOPATHOLOGY

15

- Gadow, K. D., Devincent, C. J., Pomeroy, J., & Azizian, A. (2005). Comparison of DSM-IV symptoms in elementary school-age children with PDD versus clinic and community samples. *Autism, 9*(4), 392–415. <https://doi.org/10.1177/1362361305056079>
- Gadow, K. D., DeVincent, C., & Schneider, J. (2008b). Predictors of Psychiatric Symptoms in Children with an Autism Spectrum Disorder. *Journal of Autism and Developmental Disorders, 38*(9), 1710–1720. <https://doi.org/10.1007/s10803-008-0556-8>
- Gadow, K. D., Perlman, G., Ramdhany, L., & de Ruiter, J. (2016). Clinical Correlates of Co-occurring Psychiatric and Autism Spectrum Disorder (ASD) Symptom-Induced Impairment in Children with ASD. *Journal of Abnormal Child Psychology, 44*(1), 129–139. <https://doi.org/10.1007/s10802-015-9979-9>
- Giarelli, E., Wiggins, L. D., Rice, C. E., Levy, S. E., Kirby, R. S., Pinto-Martin, J., & Mandell, D. (2010). Sex differences in the evaluation and diagnosis of autism spectrum disorders among children. *Disability and Health Journal, 3*(2), 107–116. <https://doi.org/10.1016/j.dhjo.2009.07.001>
- Gjevik, E., Eldevik, S., Fjæran-Granum, T., & Sponheim, E. (2011). Kiddie-SADS Reveals High Rates of DSM-IV Disorders in Children and Adolescents with Autism Spectrum Disorders. *Journal of Autism and Developmental Disorders, 41*(6), 761–769. <https://doi.org/10.1007/s10803-010-1095-7>
- Gordon-Lipkin, E., Marvin, A. R., Law, J. K., & Lipkin, P. H. (2018). Anxiety and Mood Disorder in Children With Autism Spectrum Disorder and ADHD. *Pediatrics, 141*(4), e20171377. <https://doi.org/10.1542/peds.2017-1377>
- Hallett, V., Lecavalier, L., Sukhodolsky, D. G., Cipriano, N., Aman, M. G., McCracken, J. T., McDougle, C. J., Tierney, E., King, B. H., Hollander, E., Sikich, L., Bregman, J., Anagnostou, E., Donnelly, C., Katsoyich, L., Dukes, K., Vitiello, B., Gadow, K., & Scahill, L. (2013a). Exploring the Manifestations of Anxiety in Children with Autism Spectrum Disorders. *Journal of Autism and Developmental Disorders, 43*(10), 2341–2352. <https://doi.org/10.1007/s10803-013-1775-1>
- Hallett, V., Ronald, A., Colvert, E., Ames, C., Woodhouse, E., Lietz, S., Garnett, T., Gillan, N., Rijdsdijk, F., Scahill, L., Bolton, P., & Happé, F. (2013b). Exploring anxiety symptoms in a large-scale twin study of children with autism spectrum disorders, their co-twins and controls. *Journal of Child Psychology and Psychiatry, 54*(11), 1176–1185. <https://doi.org/10.1111/jcpp.12068>

## SUBGROUPING BASED ON CO-OCCURRING PSYCHOPATHOLOGY

16

- Harris, H. K., Lee, C., Sideridis, G. D., Barbaresi, W. J., & Harstad, E. (2021). Identifying Subgroups of Toddlers with DSM-5 Autism Spectrum Disorder Based on Core Symptoms. *Journal of Autism and Developmental Disorders*. <https://doi.org/10.1007/s10803-021-04879-z>
- Havdahl, K. A., Hus Bal, V., Huerta, M., Pickles, A., Øyen, A.-S., Stoltenberg, C., Lord, C., & Bishop, S. L. (2016). Multidimensional Influences on Autism Symptom Measures: Implications for Use in Etiological Research. *Journal of the American Academy of Child & Adolescent Psychiatry*, 55(12), 1054-1063.e3. <https://doi.org/10.1016/j.jaac.2016.09.490>
- James, R. J. E., Dubey, I., Smith, D., Ropar, D., & Tunney, R. J. (2016). The Latent Structure of Autistic Traits: A Taxometric, Latent Class and Latent Profile Analysis of the Adult Autism Spectrum Quotient. *Journal of Autism and Developmental Disorders*, 46(12), 3712–3728. <https://doi.org/10.1007/s10803-016-2897-z>
- Kaat, A. J., Gadow, K. D., & Lecavalier, L. (2013). Psychiatric Symptom Impairment in Children with Autism Spectrum Disorders. *Journal of Abnormal Child Psychology*, 41(6), 959–969. <https://doi.org/10.1007/s10802-013-9739-7>
- Kim, H., Keifer, C., Rodriguez-Seijas, C., Eaton, N., Lerner, M., & Gadow, K. (2019). Quantifying the Optimal Structure of the Autism Phenotype: A Comprehensive Comparison of Dimensional, Categorical, and Hybrid Models. *Journal of the American Academy of Child & Adolescent Psychiatry*, 58(9), 876-886.e2. <https://doi.org/10.1016/j.jaac.2018.09.431>
- Kim, J. A., Szatmari, P., Bryson, S. E., Streiner, D. L., & Wilson, F. J. (2000). The Prevalence of Anxiety and Mood Problems among Children with Autism and Asperger Syndrome. *Autism*, 4(2), 117–132. <https://doi.org/10.1177/1362361300004002002>
- Lai, M. C., Kassee, C., Besney, R., Bonato, S., Hull, L., Mandy, W., Szatmari, P., & Ameis, S. H. (2019). Prevalence of co-occurring mental health diagnoses in the autism population: a systematic review and meta-analysis. *The Lancet Psychiatry*, 6(10), 819–829. [https://doi.org/10.1016/S2215-0366\(19\)30289-5](https://doi.org/10.1016/S2215-0366(19)30289-5)
- Lecavalier, L. (2006). Behavioral and Emotional Problems in Young People with Pervasive Developmental Disorders: Relative Prevalence, Effects of Subject Characteristics, and Empirical Classification. *Journal of Autism and Developmental Disorders*, 36(8), 1101–1114. <https://doi.org/10.1007/s10803-006-0147-5>



## SUBGROUPING BASED ON CO-OCCURRING PSYCHOPATHOLOGY

17

- Levy, S. E., Giarelli, E., Lee, L.-C., Schieve, L. A., Kirby, R. S., Cunniff, C., Nicholas, J., Reaven, J., & Rice, C. E. (2010). Autism Spectrum Disorder and Co-occurring Developmental, Psychiatric, and Medical Conditions Among Children in Multiple Populations of the United States. *Journal of Developmental & Behavioral Pediatrics, 31*(4), 267–275. <https://doi.org/10.1097/DBP.0b013e3181d5d03b>
- Leyfer, O. T., Folstein, S. E., Bacalman, S., Davis, N. O., Dinh, E., Morgan, J., Tager-Flusberg, H., & Lainhart, J. E. (2006). Comorbid Psychiatric Disorders in Children with Autism: Interview Development and Rates of Disorders. *Journal of Autism and Developmental Disorders, 36*(7), 849–861. <https://doi.org/10.1007/s10803-006-0123-0>
- Linzer, D. A., & Lewis, J. B. (2011). polCA : An R Package for Polytomous Variable Latent Class Analysis. *Journal of Statistical Software, 42*(10). <https://doi.org/10.18637/jss.v042.i10>
- Mannion, A., & Leader, G. (2013). An analysis of the predictors of comorbid psychopathology, gastrointestinal symptoms and epilepsy in children and adolescents with autism spectrum disorder. *Research in Autism Spectrum Disorders, 7*(12), 1663–1671. <https://doi.org/10.1016/j.rasd.2013.10.002>
- Mazefsky, C. A., Schreiber, D. R., Olino, T. M., & Minshew, N. J. (2014). The association between emotional and behavioral problems and gastrointestinal symptoms among children with high-functioning autism. *Autism, 18*(5), 493–501. <https://doi.org/10.1177/1362361313485164>
- Mazurek, M. O., & Kanne, S. M. (2010). Friendship and Internalizing Symptoms Among Children and Adolescents with ASD. *Journal of Autism and Developmental Disorders, 40*(12), 1512–1520. <https://doi.org/10.1007/s10803-010-1014-y>
- McBride, N. M., Weinzimmer, S. A., La Buissonnière-Ariza, V., Schneider, S. C., Ehrenreich May, J., Lewin, A. B., McGuire, J. F., Goodman, W. K., Wood, J. J., & Storch, E. A. (2020). The Impact of Comorbidity on Cognitive-Behavioral Therapy Response in Youth with Anxiety and Autism Spectrum Disorder. *Child Psychiatry & Human Development, 51*(4), 625–635. <https://doi.org/10.1007/s10578-020-00961-2>
- Ming, X., Brimacombe, M., Chaaban, J., Zimmerman-Bier, B., & Wagner, G. C. (2008). Autism Spectrum Disorders: Concurrent Clinical Disorders. *Journal of Child Neurology, 23*(1), 6–13. <https://doi.org/10.1177/0883073807307102>
- Mosner, M. G., Kinard, J. L., Shah, J. S., McWeeny, S., Greene, R. K., Lowery, S. C., Mazefsky, C. A., & Dichter, G. S. (2019). Rates of Co-occurring Psychiatric Disorders in Autism Spectrum Disorder Using the

## SUBGROUPING BASED ON CO-OCCURRING PSYCHOPATHOLOGY

18

Mini International Neuropsychiatric Interview. *Journal of Autism and Developmental Disorders*, 49(9), 3819–3832. <https://doi.org/10.1007/s10803-019-04090>

Mullen, E. M. (1995). *Mullen scales of early learning* (pp. 58-64). Circle Pines, MN: American Guidance Service Inc.

Murphy, O., Healy, O., & Leader, G. (2009). Risk factors for challenging behaviors among 157 children with autism spectrum disorder in Ireland. *Research in Autism Spectrum Disorders*, 3(2), 474–482. <https://doi.org/10.1016/j.rasd.2008.09.008>

Muskens, J. B., Velders, F. P., & Staal, W. G. (2017). Medical comorbidities in children and adolescents with autism spectrum disorders and attention deficit hyperactivity disorders: a systematic review. *European Child & Adolescent Psychiatry*, 26(9), 1093–1103. <https://doi.org/10.1007/s00787-017-1020-0>

Muskett, A., Capriola-Hall, N. N., Radtke, S. R., Factor, R., & Scarpa, A. (2019). Repetitive behaviors in Autism Spectrum Disorder: Associations with depression and anxiety symptoms. *Research in Autism Spectrum Disorders*, 68, 101449. <https://doi.org/10.1016/j.rasd.2019.101449>

Nordahl, C. W., Iosif, A.-M., Young, G. S., Hechtman, A., Heath, B., Lee, J. K., Libero, L., Reinhardt, V. P., Winder-Patel, B., Amaral, D. G., Rogers, S., Solomon, M., & Ozonoff, S. (2020). High Psychopathology Subgroup in Young Children With Autism: Associations With Biological Sex and Amygdala Volume. *Journal of the American Academy of Child & Adolescent Psychiatry*, 59(12), 1353-1363.e2. <https://doi.org/10.1016/j.jaac.2019.11.022>

O'Brien, G., & Pearson, J. (2004). Autism and Learning Disability. *Autism*, 8(2), 125–140. <https://doi.org/10.1177/1362361304042718>

Porcu, M., & Giambona, F. (2017). Introduction to Latent Class Analysis With Applications. *The Journal of Early Adolescence*, 37(1), 129–158. <https://doi.org/10.1177/0272431616648452>

Restrepo, B., Angkustsiri, K., Taylor, S. L., Rogers, S. J., Cabral, J., Heath, B., Hechtman, A., Solomon, M., Ashwood, P., Amaral, D. G., & Nordahl, C. W. (2020). Developmental–behavioral profiles in children with autism spectrum disorder and co-occurring gastrointestinal symptoms. *Autism Research*, 13(10), 1778–1789. <https://doi.org/10.1002/aur.2354>

## SUBGROUPING BASED ON CO-OCCURRING PSYCHOPATHOLOGY

19

- Rosen, T. E., Mazefsky, C. A., Vasa, R. A., & Lerner, M. D. (2018). Co-occurring psychiatric conditions in autism spectrum disorder. *International Review of Psychiatry, 30*(1), 40–61.  
<https://doi.org/10.1080/09540261.2018.1450229>
- Salazar, F., Baird, G., Chandler, S., Tseng, E., O'sullivan, T., Howlin, P., Pickles, A., & Simonoff, E. (2015). Co-occurring Psychiatric Disorders in Preschool and Elementary School-Aged Children with Autism Spectrum Disorder. *Journal of Autism and Developmental Disorders, 45*(8), 2283–2294.  
<https://doi.org/10.1007/s10803-015-2361-5>
- Shree, A., & Shukla, P. C. (2016). Intellectual Disability: Definition, classification, causes and characteristics. *Learning Community-An International Journal of Educational and Social Development, 7*(1), 9.  
<https://doi.org/10.5958/2231-458X.2016.00002.6>
- Sikora, D. M., Vora, P., Coury, D. L., & Rosenberg, D. (2012). Attention-Deficit/Hyperactivity Disorder Symptoms, Adaptive Functioning, and Quality of Life in Children With Autism Spectrum Disorder. *Pediatrics, 130*(Supplement 2), S91–S97. <https://doi.org/10.1542/peds.2012-0900G>
- Simonoff, E., Pickles, A., Charman, T., Chandler, S., Loucas, T., & Baird, G. (2008). Psychiatric Disorders in Children With Autism Spectrum Disorders: Prevalence, Comorbidity, and Associated Factors in a Population-Derived Sample. *Journal of the American Academy of Child & Adolescent Psychiatry, 47*(8), 921–929. <https://doi.org/10.1097/CHI.0b013e318179964f>
- Sinzig, J., Bruning, N., Morsch, D., & Lehmkuhl, G. (2008). Attention profiles in autistic children with and without comorbid hyperactivity and attention problems. *Acta Neuropsychiatrica, 20*(4), 207–215.  
<https://doi.org/10.1111/j.1601-5215.2008.00292.x>
- Soke, G. N., Maenner, M. J., Christensen, D., Kurzius-Spencer, M., & Schieve, L. A. (2018). Prevalence of Co-occurring Medical and Behavioral Conditions/Symptoms Among 4- and 8-Year-Old Children with Autism Spectrum Disorder in Selected Areas of the United States in 2010. *Journal of Autism and Developmental Disorders, 48*(8), 2663–2676. <https://doi.org/10.1007/s10803-018-3521-1>
- Solomon, M., Miller, M., Taylor, S. L., Hinshaw, S. P., & Carter, C. S. (2012). Autism Symptoms and Internalizing Psychopathology in Girls and Boys with Autism Spectrum Disorders. *Journal of Autism and Developmental Disorders, 42*(1), 48–59. <https://doi.org/10.1007/s10803-011-1215-z>

## SUBGROUPING BASED ON CO-OCCURRING PSYCHOPATHOLOGY

20

- Sprenger, L., Bühler, E., Poustka, L., Bach, C., Heinzl-Gutenbrunner, M., Kamp-Becker, I., & Bachmann, C. (2013). Impact of ADHD symptoms on autism spectrum disorder symptom severity. *Research in Developmental Disabilities, 34*(10), 3545–3552. <https://doi.org/10.1016/j.ridd.2013.07.028>
- Strang, J. F., Kenworthy, L., Daniolos, P., Case, L., Wills, M. C., Martin, A., & Wallace, G. L. (2012). Depression and anxiety symptoms in children and adolescents with autism spectrum disorders without intellectual disability. *Research in Autism Spectrum Disorders, 6*(1), 406–412. <https://doi.org/10.1016/j.rasd.2011.06.015>
- Sukhodolsky, D. G., Scahill, L., Gadow, K. D., Arnold, L. E., Aman, M. G., McDougle, C. J., McCracken, J. T., Tierney, E., Williams White, S., Lecavalier, L., & Vitiello, B. (2008). Parent-Rated Anxiety Symptoms in Children with Pervasive Developmental Disorders: Frequency and Association with Core Autism Symptoms and Cognitive Functioning. *Journal of Abnormal Child Psychology, 36*(1), 117–128. <https://doi.org/10.1007/s10802-007-9165-9>
- van Steensel, F. J. A., Bögels, S. M., & Perrin, S. (2011). Anxiety Disorders in Children and Adolescents with Autistic Spectrum Disorders: A Meta-Analysis. *Clinical Child and Family Psychology Review, 14*(3), 302–317. <https://doi.org/10.1007/s10567-011-0097-0>
- van Steensel, F. J., & Heeman, E. J. (2017). Anxiety levels in children with autism spectrum disorder: A meta-analysis. *Journal of Child and Family Studies, 26*(7), 1753-1767.
- Weber, R. J., & Gadow, K. D. (2017). Relation of Psychiatric Symptoms with Epilepsy, Asthma, and Allergy in Youth with ASD vs. Psychiatry Referrals. *Journal of Abnormal Child Psychology, 45*(6), 1247–1257. <https://doi.org/10.1007/s10802-016-0212-2>
- Wechsler, D. (1999). Wechsler Abbreviated Scale of Intelligence (WASI). San Antonio, TX: Psychological Corporation.
- Wechsler, D. (2003). Wechsler Intelligence Scale for Children, 4th Edn. San Antonio, TX: Psychological Corporation.
- Wickstrom, J., Dell'Armo, K., Salzman, E., Hooker, J. L., Delehanty, A., Bishop, S., Tassé, M. J., Wetherby, A. M., Piergies, A. M. H., Damiano, D., Rauch, A., & Thurm, A. (2021). *Systematic Review: Recommendations for Rehabilitation in ASD and ID from Clinical Practice Guidelines* [Preprint]. Psychiatry and Clinical Psychology. <https://doi.org/10.1101/2021.04.05.21254892>

## SUBGROUPING BASED ON CO-OCCURRING PSYCHOPATHOLOGY

**Figure 1**

*Flowchart illustrating the participant selection process for all analyses.*

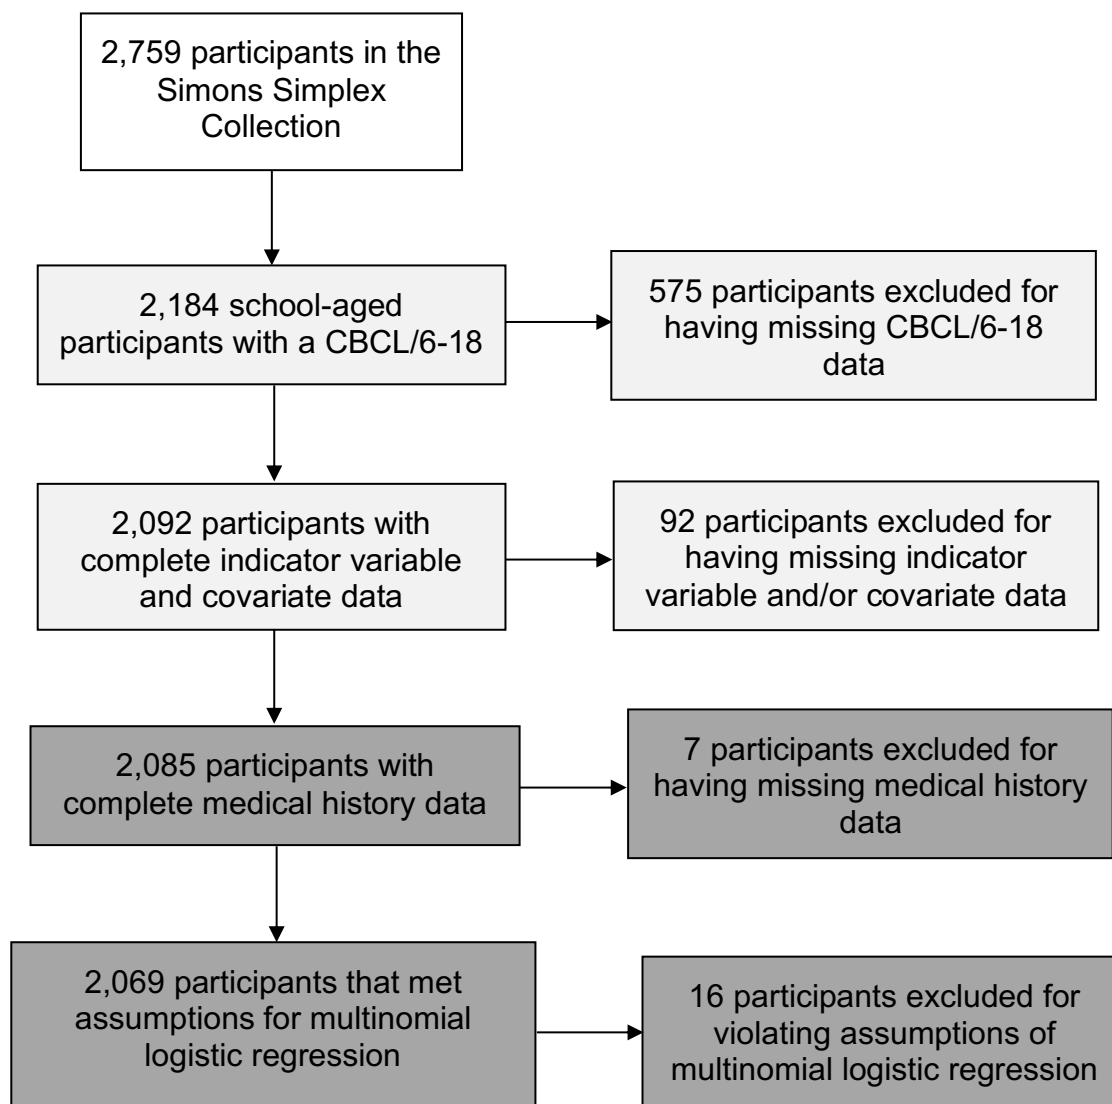

**Table 1***Demographic and clinical characteristics of all four latent classes.*

| Sample Descriptives            | Low Psychopathology |       | Externalizing Problems |       | Internalizing Problems |       | High Psychopathology |       | Total Sample |       |
|--------------------------------|---------------------|-------|------------------------|-------|------------------------|-------|----------------------|-------|--------------|-------|
|                                | n                   | %     | n                      | %     | n                      | %     | n                    | %     | n            | %     |
| Sample Size                    | 789                 | 37.72 | 257                    | 12.28 | 720                    | 34.42 | 326                  | 15.58 | 2,092        | 100   |
| Males                          | 659                 | 83.52 | 193                    | 75.10 | 669                    | 92.92 | 290                  | 88.96 | 1,811        | 86.57 |
| Age <sup>a</sup>               | 124.2               | 38.76 | 112.5                  | 32.30 | 127.7                  | 38.18 | 121.3                | 35.10 | 123.5        | 37.53 |
| Indicator Variables            |                     |       |                        |       |                        |       |                      |       |              |       |
| ADHD Problems                  | 138                 | 17.49 | 144                    | 56.03 | 265                    | 36.81 | 263                  | 80.67 | 810          | 38.72 |
| Affective Problems             | 13                  | 1.65  | 106                    | 41.25 | 405                    | 56.25 | 287                  | 88.04 | 811          | 38.77 |
| Anxiety Problems               | 16                  | 2.03  | 21                     | 8.17  | 580                    | 80.56 | 321                  | 98.47 | 938          | 44.84 |
| Conduct Problems               | 0                   | 0     | 160                    | 62.26 | 1                      | 0.13  | 247                  | 75.77 | 408          | 19.50 |
| Oppositional Defiant Problems  | 0                   | 0     | 177                    | 68.87 | 82                     | 11.39 | 288                  | 88.34 | 547          | 26.15 |
| Predictor Variables            |                     |       |                        |       |                        |       |                      |       |              |       |
| Allergies/Autoimmune Disorders | 349                 | 44.23 | 120                    | 46.70 | 356                    | 49.44 | 167                  | 51.23 | 992          | 47.42 |
| Gastrointestinal Disorders     | 322                 | 40.81 | 124                    | 48.25 | 370                    | 51.39 | 179                  | 54.91 | 995          | 47.56 |
| Intellectual Disability        | 220                 | 27.88 | 67                     | 26.07 | 160                    | 22.22 | 70                   | 21.47 | 517          | 24.71 |
| Neurological Disorders         | 397                 | 50.32 | 134                    | 52.14 | 420                    | 58.33 | 207                  | 63.50 | 1,158        | 55.35 |

<sup>a</sup> Age is described using mean and standard deviation rather than number (n) and percent (%).

**Table 2***Goodness-of-fit criteria for all six latent class models.*

| Model   | df  | AIC       | BIC       | Entropy | Smallest Class (%) |
|---------|-----|-----------|-----------|---------|--------------------|
| 1-class | 26  | 12,942.74 | 12,970.97 | 3.09    | NA                 |
| 2-class | 18  | 11,651.27 | 11,724.66 | 2.80    | 34.71              |
| 3-class | 10  | 11,537.77 | 11,656.33 | 2.76    | 26.35              |
| 4-class | 2   | 11,478.43 | 11,642.16 | 2.74    | 14.61              |
| 5-class | -6  | 11,569.77 | 11,778.67 | 2.76    | 0                  |
| 6-class | -14 | 11,510.43 | 11,764.50 | 2.74    | 0                  |

*Note.* Latent class analysis was conducted with five DSM-Oriented Scales of the Child Behavior Checklist for Ages 6 to 18 (Anxiety Problems, Affective Problems, Attention Deficit/Hyperactivity Problems, Conduct Problems, and Oppositional Defiant Problems) as indicator variables. Age and sex were used as covariates.

Figure 2

Percent of participants in each latent class with borderline/clinical symptoms of co-occurring psychopathology.

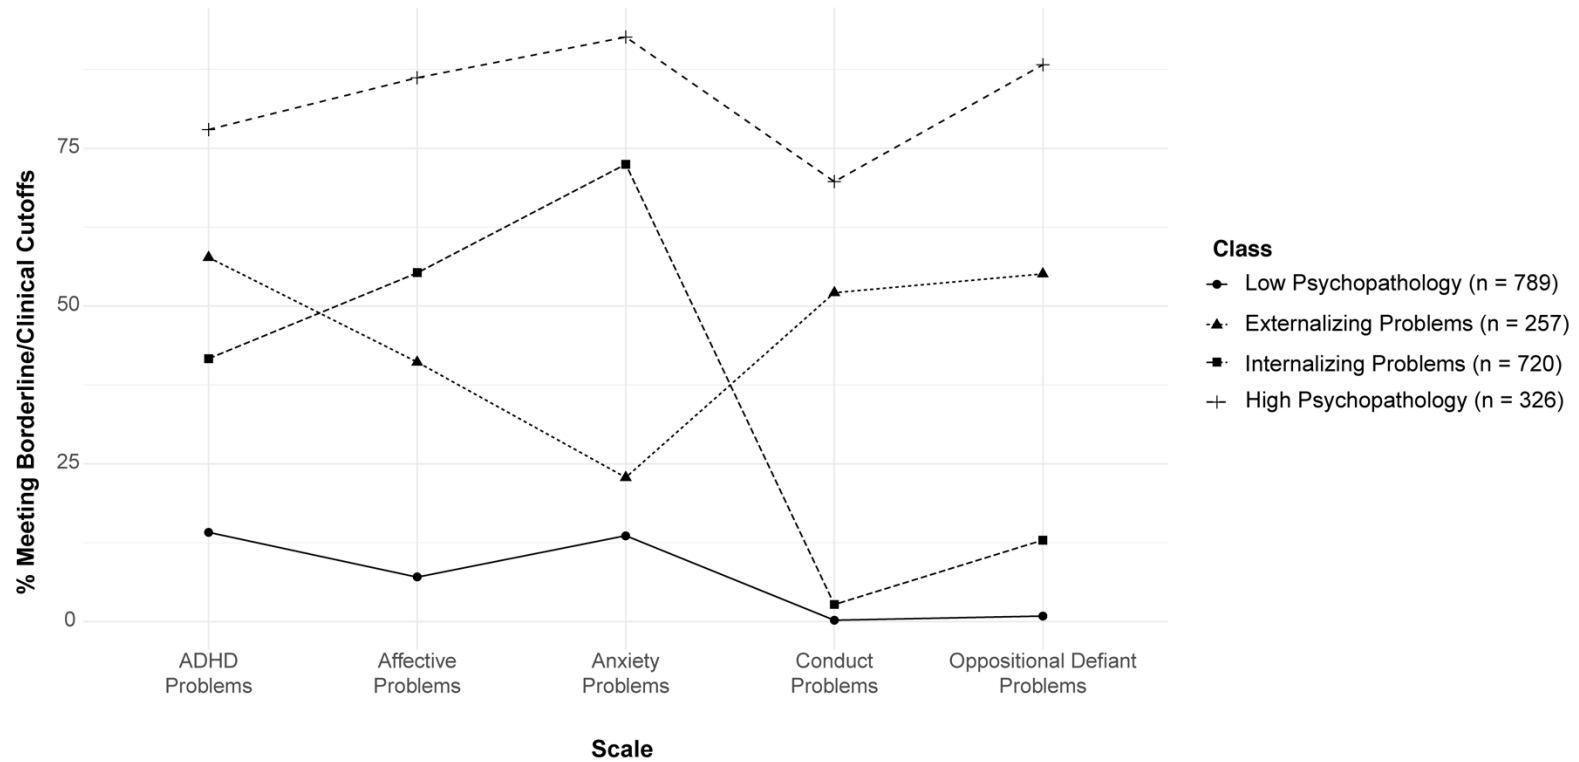

Note. Latent class analysis was conducted with five DSM-Oriented Scales of the Child Behavior Checklist for Ages 6 to 18 (Anxiety Problems, Affective Problems, Attention-Deficit/Hyperactivity Problems, Conduct Problems, and Oppositional Defiant Problems) as indicator variables. Age and sex were used as covariates.



**Table 3**

*Odds ratios (OR) and 95% confidence intervals (95% CI) describing the relationship between predictor variables and latent class membership.*

| Predictor Variables            | Externalizing Problems<br>(n = 245) |             | Internalizing Problems<br>(n = 719) |             | High Psychopathology<br>(n = 319) |             |
|--------------------------------|-------------------------------------|-------------|-------------------------------------|-------------|-----------------------------------|-------------|
|                                | OR                                  | 95% CI      | OR                                  | 95% CI      | OR                                | 95% CI      |
| Allergies/Autoimmune Disorders | 1.126                               | .840-1.509  | 1.131                               | .919-1.392  | 1.146                             | .877-1.498  |
| Gastrointestinal Disorders     | 1.481**                             | 1.102-1.989 | 1.517***                            | 1.230-1.871 | 1.814***                          | 1.383-2.378 |
| Intellectual Disability        | .709*                               | .503-.998   | .661***                             | .519-.841   | .537***                           | .388-.743   |
| Neurological Disorders         | 1.170                               | .873-1.569  | 1.368**                             | 1.110-1.685 | 1.802***                          | 1.369-2.372 |

*Note.* The “Low Psychopathology” subgroup was compared to the “Externalizing Problems,” “Internalizing Problems,” and “High Psychopathology” subgroups. For each predictor variable, the reference group was “0,” meaning that participants did not have an intellectual disability or a history of at least one gastrointestinal, neurological, or allergy/autoimmune disorder. 16 outliers were excluded for violating the assumptions of multinomial logistic regression.

\* $p < .05$ . \*\* $p < .01$ . \*\*\* $p < .001$ .
