**Subgrouping School-Aged Children on the Autism Spectrum Based on Co-Occurring Psychiatric Symptoms**

Antonia M. H. Piergies<sup>a†</sup>, Tomoya Hirota<sup>a</sup>, Rei Monden<sup>b,c</sup>, Shuting Zheng<sup>a</sup>

<sup>a</sup>Department of Psychiatry and Behavior Sciences, Weill Institute for Neurosciences, University of California, San Francisco, 401 Parnassus Ave, San Francisco, CA, 94143, USA; [apiergies@ucdavis.edu](mailto:apiergies@ucdavis.edu) (A. M. H. P.); [tomoya.hirota@ucsf.edu](mailto:tomoya.hirota@ucsf.edu) (T. H.); [shuting.zheng@ucsf.edu](mailto:shuting.zheng@ucsf.edu) (S. Z.)

<sup>b</sup>Department of Biomedical Statistics, Graduate School of Medicine, Osaka University, 2-2; Yamadaoka, Suita, Osaka, 565-0871, Japan; [mondn@biostat.med.osaka-u.ac.jp](mailto:mondn@biostat.med.osaka-u.ac.jp) (R. M.)

<sup>c</sup>University of Groningen, University Medical Center Groningen, Interdisciplinary Center Psychopathology and Emotion Regulation (ICPE), Hanzeplein 1, 9713 GZ Groningen, Netherlands

<sup>†</sup>Corresponding author

**Abstract**

**Background:** Phenotypic heterogeneity along the autism spectrum is compounded by co-occurring psychiatric conditions. Deriving subgroups of autistic individuals based on symptoms of these conditions could better our understanding of psychiatric symptom patterns existing within this population. This study's goals were to derive subgroups of school-aged autistic children based on co-occurring psychiatric symptoms while controlling for age and sex and to examine correlates of subgroup membership while controlling for the degree of ASD-related diagnostic features. **Method:** Latent class models were estimated in a sample from the Simons Simplex Collection ( $n = 2,087$ ) using "borderline/clinical" versus "normative" range data from five of the *DSM*-Oriented Scales from the CBCL/6-18 as indicator variables. We evaluated the predictive value of  $NVIQ < 70$ , atypical sleep duration, allergies/autoimmune conditions, gastrointestinal conditions, and neurological conditions on subgroup membership using multinomial logistic regression. **Results:** Four subgroups emerged: *Low Psychiatric Symptoms* (41.02%), *Externalizing Symptoms* (12.36%), *Internalizing Symptoms* (31.58%), and *High Psychiatric Symptoms* (15.05%). Key findings were that  $NVIQ < 70$  was associated with decreased odds of belonging to the *Internalizing Symptoms* and *High Psychiatric Symptoms* subgroups over the *Low Psychiatric Symptoms* subgroup, while atypical sleep duration and gastrointestinal conditions were associated with increased odds of belonging to the *Externalizing Symptoms* and *High Psychiatric Symptoms* subgroups. Neurological conditions were also associated with increased odds of belonging to the *Externalizing Symptoms* subgroup. **Conclusion:** Distinct patterns of psychiatric symptoms exist within school-aged autistic children and are correlated with  $NVIQ < 70$ , atypical sleep duration, and medical conditions, providing insights for clinical practice and etiology-driven research.

*Keywords:* autism spectrum disorder, latent class analysis, co-occurring psychiatric symptoms, nonverbal IQ, atypical sleep duration, medical conditions

## **Introduction**

Co-occurring psychiatric conditions are prevalent among autistic children (Rosen et al., 2018), with 70-91% meeting diagnostic criteria for at least one at some point during their lifetimes (Leyfer et al., 2006; Simonoff et al., 2008; Salazar et al., 2015; Mosner et al., 2019). Common co-occurring conditions include anxiety disorders, attention-deficit/hyperactivity disorder (ADHD), depressive disorders, obsessive-compulsive disorder (OCD), and oppositional defiant disorder (ODD; Simonoff et al., 2008; Gjevik et al., 2011; Lai et al., 2019).

The presence of psychiatric conditions has been linked to increased impairments in adaptive, social, and academic functioning (Kim et al., 2000; Sikora et al., 2012; Kaat et al., 2013), and can make diagnosing autism spectrum disorder (ASD) more challenging (Levy et al., 2010; Rosen et al., 2018). For example, the presence of internalizing and externalizing symptoms—those that are internally- (e.g., anxiety problems) and externally-driven (e.g., conduct problems), respectively—has been shown to impact the sensitivity and specificity of commonly-used ASD screeners and diagnostic measures, including the Autism Diagnostic Interview-Revised (ADI-R), the Autism Diagnostic Observation Schedule (ADOS), the Modified Checklist for Autism in Toddlers (MCHAT), and the Social Responsiveness Scale (SRS; Havdahl et al., 2016; Colombi et al., 2019; Christopher et al., 2020). Additionally, the presence of internalizing and externalizing symptoms appear to differentially affect intervention responses in autistic children. For example, one study reported that autistic children with ADHD did not respond to a ten-week social skills training, whereas those with an anxiety disorder and those without a co-occurring psychiatric condition did (Antshel et al., 2011).

Co-occurring psychiatric conditions further contribute to the phenotypic heterogeneity of ASD. On the one hand, they can influence the presentation of core ASD diagnostic features (Wood & Gadow, 2010; Sprenger et al., 2013) and the presentation of associated psychiatric symptoms (Sinzig et al., 2008). For example, compared to autistic children without ADHD and children with ADHD alone, autistic children with ADHD can present with more attentional and social difficulties (Sinzig et al., 2008; Sprenger et al., 2013), and autistic children with an anxiety or a depressive disorder can present with more restricted/repetitive behaviors and social withdrawal (Chandrasekhar & Sikich, 2015; Muskett et al., 2019). On the other hand, co-occurring psychiatric conditions can make associated symptoms, such as anxiety, present atypically

## SUBGROUPING BASED ON CO-OCCURRING CONDITIONS

4

(Kerns & Kendall, 2012). In autistic children, anxiety can manifest as obsessive-compulsive behaviors without premonitory distress and uncommon types of specific phobia, for example. Since some psychiatric conditions are more likely to present together in the same, autistic child than others—for example, an ADHD diagnosis is often accompanied by diagnoses of an anxiety disorder, a mood disorder, or ODD (Gadow et al., 2008a; Gordon-Lipkin et al., 2018)—patterns of psychiatric symptoms are suspected to exist in this population. Deriving subgroups based on co-occurring psychiatric symptoms could facilitate the identification of symptom patterns in this population, which could in turn be used in future studies to better our understanding of the shared and distinct mechanisms underlying specific symptom profiles. Transdiagnostic constructs, in particular, could prove useful to prevention, screening, detection, and intervention efforts and lead to more efficient delivery of services. For example, shifting the focus of psychiatric symptom measures away from diagnostic categories and towards constructs that are impaired across disorders would allow for interventions that are both more tailored to one's needs and more generalizable along the autism spectrum, as autistic children often present with multiple, co-occurring conditions (Simonoff et al., 2008).

One useful technique for deriving subgroups is latent class analysis (LCA; Porcu & Giambona, 2017), a person-centered approach that assigns individuals to otherwise unobserved classes based on a combination of observed categorical variables. Several studies have used person-centered approaches when attempting to disentangle the heterogeneity in the expression of autistic traits (Gotham et al., 2012; Lord et al., 2012; James et al., 2016; Lerner et al., 2017; Kim et al., 2019; Harris et al., 2021) and the presentation of other developmental and behavioral characteristics (Landa et al., 2012; Wiggins et al., 2017; Kang et al., 2020; Zheng et al., 2020). However, relatively little attention in the subgrouping literature has been given to co-occurring psychiatric symptoms, which have been recognized as an area of importance (Lombardo et al., 2019). The few studies that have considered co-occurring psychiatric symptoms when subgrouping samples of autistic children are limited in that they either focused on older, school-aged children ( $\geq 15$  years) and aggregated all psychiatric symptoms into a single large category (Doshi-Velez et al., 2014) or focused on younger, preschool-aged children and kept psychiatric symptoms separated, even though multiple, co-occurring conditions are more common in older children (Wiggins et al., 2017; Dovgan & Mazurek, 2019; Nordahl et al., 2020). Additionally, all these studies included other

## **SUBGROUPING BASED ON CO-OCCURRING CONDITIONS**

5

child-level indicator variables (e.g., adaptive functioning, cognitive development) in their models along with psychiatric symptoms. Although these studies have demonstrated the potential for identifying more homogeneous ASD subgroups, no study has systematically examined whether meaningful subgroups of children within the entire school-aged range (6 to 18 years) can be formed based solely on patterns of psychiatric symptoms. The school-aged period is crucial to the study of psychiatric symptoms, as most psychiatric conditions emerge within it as children undergo physiological and neurodevelopmental changes (e.g., puberty) and are exposed to a myriad of environmental stimuli (e.g., interactions with caregivers, peers, and teachers; Solmi et al., 2021).

The presentation of co-occurring psychiatric conditions in autistic children is complex and can be influenced by various factors, such as cognitive ability, sleep duration, and medical history. Regarding cognitive ability, some studies show that autistic children with below average cognitive ability experience more anxiety and exhibit more challenging behaviors (e.g., aggression, self-injury; Bradley et al., 2004; O'Brien & Pearson, 2004; Murphy et al., 2009), while others suggest more internalizing and externalizing symptoms in those with average or above average cognitive ability (Gadow et al., 2005; Gadow et al., 2008b; van Steensel et al. 2011; Gjevik et al., 2011; Strang et al., 2012). With regard to sleep duration, atypical sleep duration, especially that due to insomnia, has been associated with increased internalizing and externalizing symptoms, namely attention difficulties, anxiety, and mood dysregulation, in autistic children (Park et al., 2012; Richdale & Baglin, 2015; Veatch et al., 2017).

In addition to co-occurring psychiatric symptoms, it is estimated that 10-77% of autistic children have a co-occurring medical condition, with gastrointestinal conditions, neurological conditions, and allergies/autoimmune conditions being among the most well-studied (Muskens, et al., 2017). The presence of medical conditions, especially gastrointestinal and neurological conditions, has also been positively associated with internalizing and externalizing symptoms in autistic children (Gadow et al., 2008b; Simonoff et al., 2008; Mannion & Leader, 2013; Mazefsky et al., 2014; Fulceri et al., 2016; Weber & Gadow, 2017; Restrepo et al., 2020). However, several studies have not found significant associations between other medical conditions (e.g., allergies/autoimmune conditions) and co-occurring psychiatric symptoms in autistic children (Ming et al., 2008; Weber & Gadow, 2017). Considering these mixed

## **SUBGROUPING BASED ON CO-OCCURRING CONDITIONS**

6

findings, more research is needed to investigate the relationship between child-level factors and co-occurring psychiatric symptoms, especially in terms of symptom-based subgroups.

In addition, age and sex have been shown to differentially affect the presentation of co-occurring psychiatric symptoms in autistic children. Older children seem to be at higher risk for internalizing and externalizing symptoms than younger children (Fodstad et al., 2010; Salazar et al., 2015; Soke et al., 2018), while internalizing symptoms are more often reported in females, and externalizing symptoms are more often reported in males (Giarelli et al. 2010; Solomon et al., 2012; Salazar et al., 2015). These studies imply that age and sex should be carefully controlled during investigations of co-occurring psychiatric symptoms in autistic children. Lastly, there is emerging but inconsistent evidence of a relationship between the degree of ASD-related diagnostic features and co-occurring psychiatric symptoms, cognitive ability, atypical sleep duration, and medical conditions, with studies reporting positive (Yoshida & Uchiyama, 2004; Jang et al., 2010; Snow & Lecavalier, 2011; Wang et al., 2011; Ewen et al., 2019; Lindor et al., 2019) and negative (Mosner et al., 2020) relationships as well as no relationship (Simonoff et al., 2013; Louwerse et al., 2015; Lindor et al., 2019). Therefore, studies probing whether these factors influence the presentation of co-occurring psychiatric symptoms should control for the degree of ASD-related diagnostic features.

The purpose of this study was (1) to derive subgroups of school-aged autistic children based on the presence of co-occurring psychiatric symptoms while controlling for age and sex and (2) to examine predictors of subgroup membership, focusing on the presence of cognitive ability, atypical sleep duration, and three groups of medical conditions—allergies/autoimmune conditions, gastrointestinal conditions, and neurological conditions—while controlling for the degree of ASD-related diagnostic features.

## **Methods**

### **Participants**

Data were obtained from the Simons Simplex Collection (SSC; version 15). The data collection process has been described in detail elsewhere (Fischbach & Lord, 2010) and briefly summarized below. Phenotypic data were collected over a six-month period from more than 2,700 families that were already receiving services from one of twelve university-affiliated clinics. Each family was composed of a single autistic child (i.e., the proband), their unaffected parents, and their unaffected sibling(s). To be included in

## SUBGROUPING BASED ON CO-OCCURRING CONDITIONS

7

the SSC, probands needed to be English-speaking, older than 4 years old, and younger than 18 years old. Probands also needed to have a best-estimate diagnosis of ASD and meet designated criteria on the ADI-R, the ADOS, and a measure of nonverbal cognitive ability. Specifically, for the ADI-R, probands were required to either surpass standard cutoffs on both the Language/Communication and Reciprocal Social Interactions domains, surpass one domain's cutoff and be within two points of the other domain's cutoff, or be within one point of both domains' cutoffs. For the ADOS, probands were required to surpass cutoffs for Autism Spectrum or Autism classification. For the measure of nonverbal cognitive ability, probands under 6 years and 11 months of age were required to have a nonverbal mental age  $\geq 24$  months, although exceptions of mental ages  $< 24$  months but  $\geq 18$  months were made after careful review when necessary. Probands 7 years of age or older were required to have a nonverbal mental age of  $\geq 30$  months (see the SSC's Researcher Welcome Packet for more information on inclusion criteria). Informed consent was obtained at each data collection site included in the SSC.

Figure 1 illustrates the participant selection process for the current study. Our original analytic sample consisted of 2,184 school-aged autistic children (aged 6 to 18 years old) whose caregivers had completed a CBCL/6-18. For the LCA, 97 (4.44%) of the participants were excluded because they had missing data for indicator variables and/or covariates (described below), resulting in a sample of 2,087 (95.56%) children. Further, 36 (1.72% of 2,087) participants from the LCA sample were excluded from the multinomial logistic regression due to missing indicator variables data, resulting in a sample of 2,051 (93.91%) children. An additional 97 (4.73% of 2,051) participants were excluded from this analysis because they were considered outliers, having standardized residuals  $> |2|$  and therefore violating the assumptions of multinomial logistic regression. Thus, the final sample consisted of 1,954 (89.47%) children.

### Measures

#### *Indicator Variables for Latent Class Analysis*

The presence of co-occurring psychiatric symptoms was determined using the *DSM-Oriented Scales* of the caregiver-report form of the CBCL/6-18. The scales are comprised of items that describe specific emotions and behaviors. These items are first rated 0 ("not true") to 2 ("often" or "very true") by caregivers. *T*-scores are then calculated based on raw score totals. While the *DSM-Oriented Scales* are

## SUBGROUPING BASED ON CO-OCCURRING CONDITIONS

8

more dimensional measures of symptom levels (although *T*-scores may not even capture the full range of variation), for the purpose of the current analysis, we dichotomized *T*-scores based on the recommended cutoffs separating the “borderline/clinical” (elevated levels of symptoms defined by *T*-scores  $\geq 65$ ) and “normative” ranges (absence of elevated symptoms defined by *T*-scores  $< 65$ ; Achenbach & Rescorla, 2001). We estimated latent class models using five of the six *DSM*-Oriented Scales: ADHD Problems, Affective Problems, Anxiety Problems, Conduct Problems, and Oppositional Defiant Problems. We excluded the Somatic Problems scale from our analysis given previously-reported concerns around its psychometric properties (Ebesutani et al., 2009) and its overlap with other scales. We also conducted a sensitivity analysis, using all six scales as indicator variables in our LCA and found little added value when the Somatic Problems scale was included (Supplementary Table 1; Supplementary Figure 1) and observed substantial agreement between class assignments from LCAs with and without the Somatic Problems scale ( $\kappa > 0.80$ ; Cohen, 1960).

### ***Indicator Variables for Multinomial Logistic Regression***

***Nonverbal IQ.*** Nonverbal IQ (NVIQ) was assessed using one of four measures included in the SSC data collection process, the Mullen Scales of Early Learning (Mullen, 1995), the Differential Ability Scales-II (Elliott, 2007), the Wechsler Intelligence Scale for Children-IV, or the Wechsler Abbreviated Scale of Intelligence (Wechsler, 1999; Weschler, 2003). Of note, for the Mullen, NVIQ was calculated by averaging age-equivalent scores from the Fine Motor and Visual Reception scales, dividing this average by the child’s chronological age, and multiplying this quotient by 100 (Bishop et al., 2011).

***Atypical sleep duration.*** The classification of sleep duration as atypical was determined by following the methods of a previous SSC study (Veatch et al., 2017); children whose current sleep duration fell outside of the recommended age-based ranges, per the American Academy of Pediatrics (Paruthi et al., 2016), were considered to have sleep durations that were atypical. A manually-cleaned version of this variable has been made available (Supplementary Table 8).

***Medical conditions.*** Information about medical history was obtained from the SSC’s medical history form, indicating whether or not participants had ever had a given condition, as reported by their caregiver(s). We grouped conditions into larger categories based on the organization of the SSC’s medical history form and a previous study (Croen et al., 2015; Supplementary Tables 2 and 3). While we



## SUBGROUPING BASED ON CO-OCCURRING CONDITIONS

9

started with nine groups in total—*Allergies/Autoimmune Conditions, Cancer, Chronic Illnesses, Diseases & Surgeries, Gastrointestinal Conditions, Genetic Conditions, Hearing and Vision Problems, Heart Disease, and Neurological Conditions*—we ultimately included the three that were most relevant to co-occurring psychiatric symptoms in autistic children based on previous studies: *Allergies/Autoimmune Conditions, Gastrointestinal Conditions, and Neurological Conditions* (Muskens et al., 2017; Tye et al., 2019; see Supplementary Table 2 for each group’s endorsement rate). The variables representing these three groups were coded dichotomously, with 1 indicating that a participant had a history of at least one of the conditions within the category (i.e., responses of “true” or “diagnosed” on the SSC’s medical history form) and 0 indicating that a participant did not have a history of any condition within the category (i.e., responses of “false” or “no” on the SSC’s medical history form). Ambiguous responses, such as “not sure” or “suspected,” were also coded as 0. If all the conditions in the category were missing responses, the category was coded as “NA.” The conditions in all three groups are displayed in Supplementary Table 3. The individual conditions with the highest endorsement rates in each category were: allergies and/or reactions to the environment (27.31%), food (14.37%), and medication (13.90%), asthma (10.30%), constipation (18.30%), diarrhea (6.71%), gastroesophageal reflux (6.61%), unusual stools (5.56%), excessively clumsy/uncoordinated due to a neurological condition (8.10%), and seizures (5.61%).

### **Covariates**

Age was approximated using participants’ age at ADOS administration. The degree of ASD-related diagnostic features was captured using the ADOS’s Comparison Scores (CSS; Gotham et al., 2009). Because CSS data could not be calculated for Module 4 participants at the time of collection, and were thus missing, we calculated CSS data for Module 4 participants based on the revised algorithm and added these data to our analysis (Hus & Lord, 2014).

### **Statistical Analyses**

LCA was performed in R (version 4.0.4) using the polCA package (Linzer & Lewis, 2013). Latent class models with one through six classes were estimated based on five binary indicator variables (from the CBCL/6-18’s *DSM-Oriented Scales*): ADHD symptoms, affective symptoms, anxiety symptoms, conduct symptoms, and oppositional defiant symptoms. Age and sex were included in the models as covariates. Comparisons between models were made using goodness-of-fit criteria, including the Akaike

## SUBGROUPING BASED ON CO-OCCURRING CONDITIONS

10

information criterion (AIC), the Bayesian information criterion (BIC), and entropy. Lower AIC and BIC values and higher entropy values indicate better model fit. Additional goodness-of-fit criteria (e.g., Gsq, Llik, cAIC, aBIC) are reported in Supplementary Table 4. Models were also evaluated for interpretability (i.e., whether the derived classes were clinically relevant and distinguishable). Posterior probabilities were used to assign participants to their most likely class. Multinomial logistic regression was performed in SPSS (version 27; IBM Corporation, Armonk, NY) to investigate whether the derived classes could be predicted by five variables—nonverbal IQ (NVIQ) < 70, atypical sleep duration, allergies/autoimmune conditions, gastrointestinal conditions, or neurological conditions—while controlling for the degree of ASD-related diagnostic features (measured by ADOS CSS data). Residual analysis was used to check relevant assumptions: linearity, normality, and homogeneity of variance. Multicollinearity was checked using Cramer's V. All analysis scripts can be found here:

[https://osf.io/xyvc2/?view\\_only=736ea37d02404383bc9125745e3c2391](https://osf.io/xyvc2/?view_only=736ea37d02404383bc9125745e3c2391).

### Results

For the entire LCA sample ( $n = 2,087$ ), the mean age was 10.30 years (range: 6-18,  $SD = 3.12$ ) and 1,808 (86.63%) participants were male (Table 1). Additionally, the sample included 516 (24.72%) participants who had NVIQs < 70 ( $M = 84.48$ ,  $SD = 26.28$ ), 501 (24.01%) participants who had atypical sleep duration, 992 (47.53%) who had histories of at least one allergy/autoimmune condition, 664 (31.82%) who had histories of at least one gastrointestinal condition, and 517 (24.77%) who had histories of at least one neurological condition.

[INSERT TABLE 1]

### Latent Class Analysis

The results of the LCA (Table 2), which controlled for age and sex, showed that a four-class model was optimal, with the smallest AIC and BIC. None of the entropy values were close to zero, indicating that classes were well-separated (Zhang et al., 2018). The four-class model (Figure 2) showed clear differentiation between co-occurring psychiatric symptom patterns among autistic children and adolescents, the characteristics of which are summarized in Table 3. We also performed an LCA which repeated model estimation 1,000 times using a subset of 1,000 participants as a validation sample, which

## SUBGROUPING BASED ON CO-OCCURRING CONDITIONS

11

suggested either a three- or four-class solution (Supplementary Table 4, Figure 2). The *Low Psychiatric Symptoms* subgroup was characterized by the lowest percentage of participants with “borderline/clinical” levels of all symptoms. Compared to the *Low Psychiatric Symptoms* subgroup, the *Externalizing Symptoms* subgroup had more participants with “borderline/clinical” levels of all symptoms, mainly ADHD, conduct, and oppositional defiant symptoms. The *Internalizing Symptoms* subgroup had fewer participants with “borderline/clinical” levels of ADHD, conduct, and oppositional defiant symptoms but more participants with “borderline/clinical” levels of affective and anxiety symptoms than the *Externalizing Symptoms* subgroup. The *High Psychiatric Symptoms* subgroup was characterized by the highest percentage of participants with “borderline/clinical” levels of all symptoms.

[INSERT TABLE 2]

[INSERT FIGURE 2]

### Multinomial Logistic Regression

The results of the multinomial logistic regression are presented in Table 3. Comparisons were made while controlling for the degree of ASD-related diagnostic features and using the *Low Psychiatric Symptoms* subgroup as the reference.  $NVIQ < 70$  ( $p < .001$ ), atypical sleep duration ( $p < .001$ ), allergies/autoimmune conditions ( $p < .05$ ), gastrointestinal conditions ( $p < .001$ ), and neurological conditions ( $p < .001$ ) were all found to be significant predictors of subgroup membership. Moreover, almost all these variables were significantly associated with belonging to the three subgroups characterized by elevated “borderline/clinical” levels of symptoms. Given discourse surrounding the relationship between statistical significance (i.e.,  $p$ -values) and sample size (Lantz et al., 2012), we chose to focus on predictors with the most robust effects.  $NVIQ < 70$ , atypical sleep duration, gastrointestinal conditions, and neurological conditions were the most robust predictors of subgroup membership, making participants approximately two times more or less likely to belong to one of these subgroups. Relative to the *Low Psychiatric Symptoms* subgroup, children with  $NVIQs < 70$  were less likely to belong to the *Internalizing Symptoms* ( $OR = .63, p < .001$ ) or the *High Psychiatric Symptoms* ( $OR = .42, p < .001$ ) subgroups. Children sleeping shorter or longer than recommended and children with histories of at least one gastrointestinal condition were more likely to belong to the *Externalizing Symptoms* ( $OR = 2.07, p < .001$ ;  $OR = 2.11, p < .001$ ) and *High Psychiatric Symptoms* ( $OR = 2.15, p < .001$ ;  $OR = 1.90, p < .001$ ).

## SUBGROUPING BASED ON CO-OCCURRING CONDITIONS

12

.001) subgroups than the *Low Psychiatric Symptoms* subgroup, whereas children with histories of at least one neurological condition were more likely to belong to the *Externalizing Symptoms* subgroup alone (OR = 2.15,  $p < .001$ ).

[INSERT TABLE 3]

### Discussion and Implications

#### Discussion

The current study is the first to use LCA to derive subgroups of school-aged autistic children based on patterns of co-occurring psychiatric symptoms while controlling for age and sex. We identified four subgroups, characterized by low psychiatric symptoms, externalizing symptoms, internalizing symptoms, and high psychiatric symptoms across CBCL scales. Using multinomial logistic regression, while controlling for the degree of ASD-related diagnostic features, we also found evidence of the predictive value of NVIQ < 70, atypical sleep duration, and three groups of medical conditions— allergies/autoimmune conditions, gastrointestinal conditions, and neurological conditions—for subgroup membership.

The *Low Psychiatric Symptoms* subgroup had the lowest endorsement of ADHD, affective, anxiety, conduct, and oppositional defiant symptoms. The *Low Psychiatric Symptoms* subgroup (41.02%) was the largest subgroup in our sample, suggesting that slightly less than half of school-aged autistic children are within the “normative” range for most, if not all, psychiatric symptoms measured by the CBCL/6-18. This rate is similar to rates of “no psychiatric diagnosis” in other ASD samples (37.2%; Simonoff et al., 2008) and is substantially lower than rates of belonging to the equivalent subgroup in general-population and clinically-referred samples, which are presumably majority nonautistic, of past studies that have derived subgroups based on psychiatric symptoms: 62.5% (Olino et al., 2012), 66.32% (Bianchi et al., 2017), 77.41% (Essau & de la Torre-Luque, 2019), 79.2% (Parviainen et al., 2020). Thus, this finding supports the idea of elevated, clinically-relevant psychiatric symptoms in autistic children. Additionally, the most endorsed symptom in our *Low Psychiatric Symptoms* subgroup was ADHD (16.12%), whereas the most endorsed symptoms in the equivalent subgroup of comparison samples were major depressive disorder (40.3%; Olino et al., 2012) and specific phobia (12%; Essau & de la Torre-Luque, 2019). There were

## SUBGROUPING BASED ON CO-OCCURRING CONDITIONS

13

negligible differences in endorsement across symptoms in the remaining comparison samples' equivalent subgroups (Bianchi et al., 2017; Parviainen et al., 2020).

Relative to the *Low Psychiatric Symptoms* subgroup, the *Internalizing Symptoms* subgroup had more symptom endorsement across all five scales, especially for affective and anxiety symptoms. The *Internalizing Symptoms* subgroup was our second largest subgroup (31.58%), which is unsurprising given that anxiety (44.85%) and affective (38.76%) symptoms were the most endorsed psychiatric symptoms in our sample. While the percentage of participants belonging to this subgroup is far greater than the relative size of comparison samples' equivalent subgroups (9.1-16.9%; Olinio et al., 2012; Parviainen et al., 2020), these rates are lower than previously reported rates of anxiety (56%) and depression (44%) in autistic children (Strang et al., 2012). This discrepancy could be due to the fact that 15.05% of our sample belonged to the *High Psychiatric Symptoms* subgroup, which is characterized by high rates of both internalizing and externalizing symptoms. Overall, the presence of a larger subgroup characterized by internalizing symptoms in our sample is in agreement with past studies reporting higher rates of anxiety and depression in autistic individuals as compared to individuals in the general population (White et al., 2009; Kim & Lecavalier, 2021).

The *Externalizing Symptoms* subgroup (12.3%) was the smallest subgroup in our sample, characterized by multiple highly-endorsed externalizing symptoms: ADHD (56.59%), conduct (62.79%), and oppositional defiant (68.60%) symptoms. The *Externalizing Symptoms* subgroup also had more symptom endorsement across all five scales relative to the *Low Psychiatric Symptoms* subgroup but less endorsement of affective and anxiety symptoms and more endorsement of ADHD, conduct, and oppositional defiant symptoms than the *Internalizing Symptoms* subgroup. This subgroup is larger than equivalent subgroups in Essau and de la Torre-Luque's (2019; 6.97%) and Parviainen and colleagues' (2020; 9.1%) studies, but smaller than the equivalent subgroup in Olinio and colleagues' study (2012; 16.4%). Participants in equivalent subgroups frequently endorsed multiple symptoms that were indicative of externalizing conditions, including conduct disorder, ODD, and substance use disorders, but not ADHD, although ADHD symptoms were not assessed in one of the three studies. Meanwhile, Bianchi and colleagues' (2017) study lacks such a subgroup. Rather, their study identified an "ADHD" subgroup, in which ~70% of children had attention-related symptoms in the "borderline/clinical" range but relatively few

## SUBGROUPING BASED ON CO-OCCURRING CONDITIONS

other symptoms that were externalizing. Therefore, the externalizing symptoms of autistic children, marked by a combination of ADHD, ODD, and CD, might be more intricate than those in other populations of children.

The *High Psychiatric Symptoms* subgroup had the highest endorsement of all psychiatric symptoms assessed. Notably, this subgroup (15.05%) was about double the size of Bianchi and colleagues' "Severe Dysregulated" subgroup (7.82%), and substantially larger than the equivalent subgroups in Olino and colleagues' (2012) and Parviainen and colleagues' (2020) samples, to which 2.6-4.2% of participants belonged. Essau and de la Torre-Luque's (2019) sample lacked such a subgroup entirely. Our findings demonstrate an increased rate of complex psychiatric symptom patterns in autistic children as compared to nonautistic children, with symptoms of ADHD often co-occurring with other externalizing and internalizing symptoms. Taken together, the latent structure of co-occurring psychiatric symptoms appears to be similar among autistic and nonautistic children, with the same transdiagnostic factors of "internalizing" and "externalizing" generally explaining symptom co-occurrence in both groups (Rodriguez-Seijas et al., 2020). Our study also appears to support the idea that symptom clusters (e.g., those involving ADHD symptoms) may result from a process that is unique to ASD. We observed medium-to-high endorsement rates of ADHD symptoms in the *Externalizing Symptoms*, *Internalizing Symptoms*, and *High Psychiatric Symptoms* subgroups (range: 40.52-81.53%), in addition to an endorsement rate of 16.12% in the *Low Psychiatric Symptoms* subgroup. This observation is consistent with the literature, as ASD and ADHD co-occur at rates greater than chance (Miller et al., 2019). Having ADHD symptoms might increase autistic children's risk of experiencing and exhibiting other psychiatric symptoms, such as anxiety, aggression, delinquent behavior, and thought problems (Gadow et al., 2009; Matsushima et al., 2008). Indeed, the most common combination of co-occurring psychiatric conditions in autistic children is ADHD, anxiety disorders, and ODD (Brookman-Frazee et al., 2018).

Multiple, co-occurring psychiatric conditions impact autistic children's participation in daily activities (Dovgan & Mazurek, 2019). Our subgroups represent the need for interventions targeting aspects of internalizing and externalizing symptoms singly as well as simultaneously. While interventions undoubtedly need to be individualized to align with the priorities of autistic children and their families, identifying a set of educational strategies that are effective for relatively homogeneous subgroups could

## SUBGROUPING BASED ON CO-OCCURRING CONDITIONS

be feasible, although more research is needed. For example, studies assessing the service needs of autistic children belonging to the *High Psychiatric Symptoms* subgroup could be of great importance, as internalizing symptoms may be overshadowed by externalizing symptoms. Internalizing symptoms affect school performance and peer relationships (Reaven, 2009), yet they might be less obvious targets for parents and teachers and, therefore, may be left unaddressed. One study did not find a relationship between internalizing symptoms and receipt of school services (Rosen et al., 2019). However, externalizing symptoms have been negatively associated with receipt of school services (Rosen et al., 2019). It is speculated that this relationship was due to a higher priority assigned to disruptive behaviors and thus the pursuit of out-of-school interventions. In line with this thought, another study found that autistic children with ADHD were likely to receive out-of-school interventions in addition to in-school interventions (Zablotsky et al., 2020). Thus, the need for research on the adaptation of screeners and evidence-based interventions for the internalizing and externalizing symptoms of autistic children should continue to be emphasized to ensure that sufficient support is available to this population (Kerns et al., 2016; Kerns et al., 2017).

Using multinomial logistic regression, we found that cognitive ability and atypical sleep duration were associated with subgroup membership. Specifically, we found that children with NVIQs < 70 were about half as likely to belong to the *Internalizing Symptoms* or *High Psychiatric Symptoms* subgroups than the *Low Psychiatric Symptoms* subgroup, which is consistent with previous studies suggesting that autistic individuals with average or above average cognitive ability are more often reported to have certain psychiatric conditions, such as anxiety and depressive disorders, than those with below average cognitive ability (Lecavalier, 2006; Hallett et al., 2013a; Sukhodolsky et al. 2008; Mazurek & Kanne 2010). In fact, Mayes and colleagues (2022) recently found that caregivers of autistic children with NVIQs < 70 generally reported lower internalizing and externalizing symptoms in their children than caregivers of autistic children with NVIQs  $\geq$  70. Specifically, these children had lower oppositional, irritable, tantrum, mean/bullying, lying/cheating, generalized anxiety, and depression ratings but higher separation anxiety ratings. Of note, these results were similar in a sample of children with ADHD (but without ASD). Because NVIQ < 70 was a robust predictor of *Internalizing Symptoms* and *High Psychiatric Symptoms* subgroup membership in our study, our results could be driven by data from participants with NVIQs  $\geq$  70, who



## SUBGROUPING BASED ON CO-OCCURRING CONDITIONS

16

make up over 75% of our sample. Indeed, mean NVIQ was highest for the *Internalizing Symptoms* subgroup (87.08), followed by the *High Psychiatric Symptoms* subgroup (85.02), and then the *Externalizing Symptoms* (84.53) and *Low Psychiatric Symptoms* (82.88) subgroups. It is also possible that difficulties expressing subjective emotional experiences is contributing to an underestimation of caregiver-reported psychiatric symptoms in autistic children with NVIQs < 70 (Simonoff et al., 2008; van Steensel et al., 2017), as the directionality of the relationship between cognitive ability and psychiatric conditions appears to be informant-dependent (Gadow et al., 2008b; Hallet et al., 2013b). Thus, future studies should use alternative strategies to measure psychiatric symptoms in samples of autistic children who vary in cognitive ability. For example, objective measures, such as physiological data, could help clinicians and researchers capture emotional and behavioral responses in autistic children with lower NVIQs (Kushki et al., 2013). Alternatively, autistic children with average or above average cognitive ability may be more aware of accessibility-related challenges, and this awareness could be a risk factor for psychiatric conditions (Sterling et al., 2008). Finally, parents may be overestimating psychiatric symptoms in autistic children with average or above average cognitive ability (Nicpon et al., 2010).

Atypical sleep duration predicted membership to the *Externalizing Symptoms* and *High Psychiatric Symptoms* subgroups. This finding is in line with the results of Adams and colleagues' (2014) study involving autistic children, in which increased severity of sleep disturbance was positively associated with externalizing and total (i.e., internalizing and externalizing) symptoms, as well as the results of other studies (e.g., Cohen et al., 2018). Insomnia, the more highly endorsed form of atypical sleep duration in our study, has been linked to differences in prefrontal cortex, basal ganglia, and amygdala functioning, which could be impacting executive functioning, reward anticipation, and emotional reactivity in certain contexts, leading to externalizing symptoms or overall high psychiatric symptoms (Maski & Kothare, 2013).

Additionally, using multinomial logistic regression, we found that subgroup membership was predicted by having a history of at least one gastrointestinal condition and a history of at least one neurological condition. This finding complements other studies in the literature that have found a relationship between these medical conditions and any one psychiatric condition in autistic children by adding a novel contribution: demonstrating that a history of these medical conditions predicts unique patterns based on



## SUBGROUPING BASED ON CO-OCCURRING CONDITIONS

17

the combined presence/absence of psychiatric symptoms (Gadow et al., 2008b; Simonoff et al., 2008; Mannion & Leader, 2013; Mazefsky et al., 2014; Fulceri et al., 2016; Weber & Gadow, 2017; Restrepo et al., 2020). Our findings are consistent with two studies on how these conditions affect internalizing and externalizing symptoms in autistic children. The first study found more anxiety, externalizing, and total symptoms in young children with gastrointestinal symptoms compared to those without symptoms (Fulceri et al., 2016), which is consistent with our finding that having a history of at least one gastrointestinal condition roughly doubles one's likelihood of belonging to the *Externalizing Symptoms* and *High Psychiatric Symptoms* subgroups over the *Low Psychiatric Symptoms* subgroup. The second study found that having epilepsy, one of the neurological conditions included in our study, resulted in an increased likelihood of having the psychiatric conditions that correspond to our *Externalizing Symptoms* and *High Psychiatric Symptoms* subgroups (i.e., ADHD, oppositional defiant or conduct disorder, and any emotional disorder) by ~11- and 17-fold, respectively (Simonoff et al., 2008). In our study, having a history of at least one neurological condition robustly predicted *Externalizing Symptoms* subgroup membership, increasing a child's likelihood by about two-fold. One possible explanation for the difference in the magnitude of our study's and this study's odds ratios is that we included a broader range of neurological conditions (16 conditions, Supplementary Table 3), whereas Simonoff and colleagues focused solely on epilepsy. Possible mediators of this notable association between mental and physical health in autistic children include differences in neural circuitry (e.g., the serotonergic system; Pan et al., 2021), autonomic nervous system functioning (Ferguson et al., 2017), and the gut-brain axis (Chen et al., 2021).

Our study has several limitations. First, we used a categorical framework to conceptualize psychiatric symptoms. Though dichotomizing a dimensional measure (i.e., the *DSM-Oriented Scales*) likely resulted in the loss of information on symptom levels, we chose to do so in order to make our findings directly relevant to clinical practice by focusing on the presence or absence of "borderline/clinical-range" psychiatric symptoms. Second, psychiatric symptoms may present differently in autistic children and/or children with lower cognitive ability (Kerns et al., 2012), and some symptoms may not reflect the same constructs as they do in typically developing (Rodriguez-Seijas et al., 2019) or other clinical populations (Sinzig et al., 2009). Additionally, although the CBCL's *DSM-Oriented Scales* were designed to map on to a wide range of specific disorders of the *DSM-5*, including major depressive disorder, persistent

## **SUBGROUPING BASED ON CO-OCCURRING CONDITIONS**

18

depressive disorder, generalized anxiety disorder, separation anxiety disorder, social anxiety disorder, specific phobia, ADHD, oppositional defiant disorder, and conduct disorder, they are not all-encompassing. Further, we defined atypical sleep solely based on duration. We also captured the degree of ASD-related diagnostic features via ADOS Comparison Score (CSS) data, which only provide information on behaviors observed in a limited context (Hus et al., 2014). Therefore, our study may have failed to capture some psychiatric symptoms and other co-occurring conditions in this population. Third, the cross-sectional nature of the SSC sample does not allow for the evaluation of causal relationships between our indicator variables and psychiatric symptom-based subgroups. Such relationship is likely bidirectional and warrants longitudinal investigation. Fourth, given the nature of the SSC sample and LCA, our findings may not be widely generalizable to all children on the autism spectrum. With regard to the SSC sample, multiplex families were excluded, inclusion was based on strict ADI-R and ADOS cut-offs, and participants received their best-estimate diagnosis of ASD over a decade ago. Regarding LCA, this method takes a model-based subgrouping approach, and the best fitting model is determined based on the available data, limiting the generalizability to other samples. We also caution fellow clinicians and researchers that our findings should be interpreted with the sampling method in mind, as it may not fully represent the range of psychiatric symptoms in this population due to changing diagnostic criteria and referral processes (Lai et al., 2015; Lord et al., 2018; CDC, 2021). However, our large sample size (~2,000 autistic individuals) and use of age, sex, and the degree of ASD-related diagnostic features as covariates add to the strengths of our study, which was effective at capturing the individual profiles of co-occurring psychiatric conditions that exist within our sample and predictors of such profiles.

### **Implications**

The findings of this study could have important implications for clinical practice and research. First, the four subgroups derived from our sample demonstrate a need for clinicians to be cognizant of co-occurring internalizing and externalizing symptoms in school-aged autistic children and the potential impact of these psychiatric symptoms on tools used to detect ASD. In other words, when a clinician is evaluating a school-aged child for ASD, it is likely that the child will be displaying certain patterns of co-occurring psychiatric symptoms that could affect their interpretation of ASD diagnostic measures. Additionally, our subgroups support the idea of initially using broadband screeners to evaluate the mental

## SUBGROUPING BASED ON CO-OCCURRING CONDITIONS

19

health of school-aged autistic children before using more targeted, disorder-specific measures, since the majority of participants in our sample had symptoms consistent with more than one condition. Our findings also reinforce the need for multidisciplinary services in this population, suggesting that ASD specialists consider other co-occurring conditions when they are providing care for autistic children. For example, based on our study's subgroups, when seeing an autistic child with a combination of internalizing and externalizing symptoms, a psychologist may want to collaborate with a physician to monitor for atypical sleep duration, gastrointestinal conditions, and/or neurological conditions. Psychiatric symptom-based subgroups also affect responses to intervention and should be carefully considered in the development of intervention guidelines, which are currently broad (i.e., non-specific to subpopulations), and in future studies on how different subpopulations of autistic children respond to interventions (Antshel et al., 2011; McBride et al., 2020; Dekker et al., 2021; Wickstrom et al., 2021). For example, light therapy could be beneficial to children belonging to a *High Psychiatric Symptoms* subgroup, who are at elevated risk for depression and atypical sleep duration (Fritzsche et al., 2001). Finally, the findings of this study provide additional rationale to investigate the shared and distinct mechanisms between psychiatric conditions and other co-occurring conditions. Relatively little research has been done in this area, but differences in emotion regulation, executive functioning, and cognitive control are among potential candidates (Mazefsky et al., 2013; Neuhaus et al., 2014; Weiss, 2014; Hedley et al., 2021). Since the SSC has extensive phenotypic and genetic data available, future studies could replicate our subgroups and directly examine potential transdiagnostic constructs. For example, several studies have suggested shared genetic contributions to ASD and ADHD phenotypes as well as ASD, depression, and anxiety phenotypes (Ronald et al., 2014; Ruparel et al., 2017). Studies have also suggested overlap in genetic factors that increase one's chances of developing ASD, intellectual disability, atypical sleep duration, and medical conditions (Veatch et al., 2015; Jeste & Geschwind, 2014). Finally, studies should investigate contextual factors contributing to the mental health of school-aged autistic children. For example, ASD acceptance from external sources is associated with depression (Cage et al., 2018). In conclusion, our findings indicate that there are unique patterns of psychiatric symptoms among school-aged autistic children which are associated with cognitive ability, atypical sleep duration, and medical conditions. To improve the ways in which we support autistic children, we argue

## **SUBGROUPING BASED ON CO-OCCURRING CONDITIONS**

20

that professionals should go beyond the diagnosis of ASD and consider an individual's comprehensive profile when diagnosing, treating, and researching this population.

### **Acknowledgements**

Dr. Monden was partially supported by the Clinical Investigator's Research Project at Osaka University's Graduate School of Medicine. Many thanks to Drs. Caroline Lew, Jordan Wickstrom, and Meghan Miller for their valuable feedback on drafts. We are grateful to all of the families at the participating Simons Simplex Collection (SSC) sites, as well as the principal investigators (A. Beaudet, R. Bernier, J. Constantino, E. Cook, E. Fombonne, D. Geschwind, R. Goin-Kochel, E. Hanson, D. Grice, A. Klin, D. Ledbetter, C. Lord, C. Martin, D. Martin, R. Maxim, J. Miles, O. Ousley, K. Pelphrey, B. Peterson, J. Piggot, C. Saulnier, M. State, W. Stone, J. Sutcliffe, C. Walsh, Z. Warren, E. Wijsman). We also appreciate obtaining access to phenotypic data on SFARI Base. Approved researchers can obtain the SSC population datasets described in this study by applying at <https://base.sfari.org>.

### **Conflicts of Interest**

There are no conflicts of interest for the authors to disclose.

**References**

- Adams, H. L., Matson, J. L., & Jang, J. (2014). The relationship between sleep problems and challenging behavior among children and adolescents with autism spectrum disorder. *Research in Autism Spectrum Disorders*, 8(9), 1024–1030. <https://doi.org/10.1016/j.rasd.2014.05.008>
- Bianchi, V., Brambilla, P., Garzitto, M., Colombo, P., Fornasari, L., Bellina, M., Bonivento, C., Tesei, A., Piccin, S., Conte, S., Perna, G., Frigerio, A., Castiglioni, I., Fabbro, F., Molteni, M., & Nobile, M. (2017). Latent classes of emotional and behavioural problems in epidemiological and referred samples and their relations to DSM-IV diagnoses. *European Child & Adolescent Psychiatry*, 26(5), 549–557. <https://doi.org/10.1007/s00787-016-0918-2>
- Bishop, S. L., Guthrie, W., Coffing, M., & Lord, C. (2011). Convergent Validity of the Mullen Scales of Early Learning and the Differential Ability Scales in Children With Autism Spectrum Disorders. *American Journal on Intellectual and Developmental Disabilities*, 116(5), 331–343. <https://doi.org/10.1352/1944-7558-116.5.331>
- Bradley, E. A., Summers, J. A., Wood, H. L., & Bryson, S. E. (2004). Comparing Rates of Psychiatric and Behavior Disorders in Adolescents and Young Adults with Severe Intellectual Disability with and without Autism. *Journal of Autism and Developmental Disorders*, 34(2), 151–161. <https://doi.org/10.1023/B:JADD.0000022606.97580.19>
- Brookman-Frazee, L., Stadnick, N., Chlebowski, C., Baker-Ericzén, M., & Ganger, W. (2018). Characterizing psychiatric comorbidity in children with autism spectrum disorder receiving publicly funded mental health services. *Autism*, 22(8), 938–952. <https://doi.org/10.1177/1362361317712650>
- Cage, E., Di Monaco, J., & Newell, V. (2018). Experiences of Autism Acceptance and Mental Health in Autistic Adults. *Journal of Autism and Developmental Disorders*, 48(2), 473–484. <https://doi.org/10.1007/s10803-017-3342-7>
- Chandrasekhar, T., & Sikich, L. (2015). Challenges in the diagnosis and treatment of depression in autism spectrum disorders across the lifespan. *Dialogues in Clinical Neuroscience*, 17(2), 219–227. <https://www.ncbi.nlm.nih.gov/pmc/articles/PMC4518704/>

## SUBGROUPING BASED ON CO-OCCURRING CONDITIONS

22

- Christopher, K., Bishop, S., Carpenter, L. A., Warren, Z., & Kanne, S. (2021). The Implications of Parent-Reported Emotional and Behavioral Problems on the Modified Checklist for Autism in Toddlers. *Journal of Autism and Developmental Disorders*, 51(3), 884–891. <https://doi.org/10.1007/s10803-020-04469-5>
- Cohen, S., Fulcher, B. D., Rajaratnam, S. M. W., Conduit, R., Sullivan, J. P., St Hilaire, M. A., Phillips, A. J. K., Loddenkemper, T., Kothare, S. V., McConnell, K., Braga-Kenyon, P., Ahearn, W., Shlesinger, A., Potter, J., Bird, F., Cornish, K. M., & Lockley, S. W. (2018). Sleep patterns predictive of daytime challenging behavior in individuals with low-functioning autism. *Autism Research*, 11(2), 391–403. <https://doi.org/10.1002/aur.1899>
- Colombi, C., Fish, A., & Ghaziuddin, M. (2020). Utility of the ADOS-2 in children with psychiatric disorders. *European Child & Adolescent Psychiatry*, 29(7), 989–992. <https://doi.org/10.1007/s00787-019-01411-8>
- Croen, L. A., Zerbo, O., Qian, Y., Massolo, M. L., Rich, S., Sidney, S., & Kripke, C. (2015). The health status of adults on the autism spectrum. *Autism*, 19(7), 814–823. <https://doi.org/10.1177/1362361315577517>
- de Bildt, A., Sytema, S., Kraijer, D., Sparrow, S., & Minderaa, R. (2005). Adaptive functioning and behaviour problems in relation to level of education in children and adolescents with intellectual disability. *Journal of Intellectual Disability Research*, 49(9), 672–681. <https://doi.org/10.1111/j.1365-2788.2005.00711.x>
- Dekker, V., Nauta, M. H., Timmerman, M. E., Mulder, E. J., Hoekstra, P. J., & de Bildt, A. (2021). Application of Latent Class Analysis to Identify Subgroups of Children with Autism Spectrum Disorders who Benefit from Social Skills Training. *Journal of Autism and Developmental Disorders*, 51(6), 2004–2018. <https://doi.org/10.1007/s10803-020-04678-y>
- Doshi-Velez, F., Ge, Y., & Kohane, I. (2014). Comorbidity Clusters in Autism Spectrum Disorders: An Electronic Health Record Time-Series Analysis. *Pediatrics*, 133(1), e54–e63. <https://doi.org/10.1542/peds.2013-0819>
- Dovgan, K., & Mazurek, M. O. (2019). Impact of multiple co-occurring emotional and behavioural conditions on children with autism and their families. *Journal of Applied Research in Intellectual Disabilities*, 32(4), 967–980. <https://doi.org/10.1111/jar.12590>
- Essau, C. A., & de la Torre-Luque, A. (2019). Comorbidity profile of mental disorders among adolescents: A latent class analysis. *Psychiatry Research*, 278, 228–234. <https://doi.org/10.1016/j.psychres.2019.06.007>

## SUBGROUPING BASED ON CO-OCCURRING CONDITIONS

23

- Ewen, J. B., Marvin, A. R., Law, K., & Lipkin, P. H. (2019). Epilepsy and Autism Severity: A Study of 6,975 Children. *Autism Research, 12*(8), 1251–1259. <https://doi.org/10.1002/aur.2132>
- Fodstad, J. C., Rojahn, J., & Matson, J. L. (2010). Emergent Comorbidity in At Risk Children with and without Autism Spectrum Disorder—A Cross-Sectional Study. *Journal of Developmental and Physical Disabilities, 22*(4), 381–400. <https://doi.org/10.1007/s10882-010-9202-4>
- Fritzsche, M., Heller, R., Hill, H., & Kick, H. (2001). Sleep deprivation as a predictor of response to light therapy in major depression. *Journal of Affective Disorders, 62*(3), 207–215. [https://doi.org/10.1016/S0165-0327\(00\)00154-3](https://doi.org/10.1016/S0165-0327(00)00154-3)
- Fulceri, F., Morelli, M., Santocchi, E., Cena, H., Del Bianco, T., Narzisi, A., Calderoni, S., & Muratori, F. (2016). Gastrointestinal symptoms and behavioral problems in preschoolers with Autism Spectrum Disorder. *Digestive and Liver Disease, 48*(3), 248–254. <https://doi.org/10.1016/j.dld.2015.11.026>
- Gadow, K. D., DeVincent, C. J., & Drabick, D. A. G. (2008a). Oppositional Defiant Disorder as a Clinical Phenotype in Children with Autism Spectrum Disorder. *Journal of Autism and Developmental Disorders, 38*(7), 1302–1310. <https://doi.org/10.1007/s10803-007-0516-8>
- Gadow, K. D., Devincent, C. J., Pomeroy, J., & Azizian, A. (2005). Comparison of DSM-IV symptoms in elementary school-age children with PDD versus clinic and community samples. *Autism, 9*(4), 392–415. <https://doi.org/10.1177/1362361305056079>
- Gadow, K. D., DeVincent, C. J., & Schneider, J. (2009). Comparative Study of Children With ADHD Only, Autism Spectrum Disorder + ADHD, and Chronic Multiple Tic Disorder + ADHD. *Journal of Attention Disorders, 12*(5), 474–485. <https://doi.org/10.1177/1087054708320404>
- Gadow, K. D., DeVincent, C., & Schneider, J. (2008b). Predictors of Psychiatric Symptoms in Children with an Autism Spectrum Disorder. *Journal of Autism and Developmental Disorders, 38*(9), 1710–1720. <https://doi.org/10.1007/s10803-008-0556-8>
- Giarelli, E., Wiggins, L. D., Rice, C. E., Levy, S. E., Kirby, R. S., Pinto-Martin, J., & Mandell, D. (2010). Sex differences in the evaluation and diagnosis of autism spectrum disorders among children. *Disability and Health Journal, 3*(2), 107–116. <https://doi.org/10.1016/j.dhjo.2009.07.001>



## SUBGROUPING BASED ON CO-OCCURRING CONDITIONS

24

- Gjevik, E., Eldevik, S., Fjæran-Granum, T., & Sponheim, E. (2011). Kiddie-SADS Reveals High Rates of DSM-IV Disorders in Children and Adolescents with Autism Spectrum Disorders. *Journal of Autism and Developmental Disorders*, *41*(6), 761–769. <https://doi.org/10.1007/s10803-010-1095-7>
- Gordon-Lipkin, E., Marvin, A. R., Law, J. K., & Lipkin, P. H. (2018). Anxiety and Mood Disorder in Children With Autism Spectrum Disorder and ADHD. *Pediatrics*, *141*(4), e20171377. <https://doi.org/10.1542/peds.2017-1377>
- Gotham, K., Pickles, A., & Lord, C. (2009). Standardizing ADOS Scores for a Measure of Severity in Autism Spectrum Disorders. *Journal of Autism and Developmental Disorders*, *39*(5), 693–705. <https://doi.org/10.1007/s10803-008-0674-3>
- Gotham, K., Pickles, A., & Lord, C. (2012). Trajectories of Autism Severity in Children Using Standardized ADOS Scores. *PEDIATRICS*, *130*(5), e1278–e1284. <https://doi.org/10.1542/peds.2011-3668>
- Harris, H. K., Lee, C., Sideridis, G. D., Barbaresi, W. J., & Harstad, E. (2021). Identifying Subgroups of Toddlers with DSM-5 Autism Spectrum Disorder Based on Core Symptoms. *Journal of Autism and Developmental Disorders*. <https://doi.org/10.1007/s10803-021-04879-z>
- Havdahl, K. A., Hus Bal, V., Huerta, M., Pickles, A., Øyen, A.-S., Stoltenberg, C., Lord, C., & Bishop, S. L. (2016). Multidimensional Influences on Autism Symptom Measures: Implications for Use in Etiological Research. *Journal of the American Academy of Child & Adolescent Psychiatry*, *55*(12), 1054-1063.e3. <https://doi.org/10.1016/j.jaac.2016.09.490>
- Hedley, D., Uljarević, M., Cai, R. Y., Bury, S. M., Stokes, M. A., & Evans, D. W. (2021). Domains of the autism phenotype, cognitive control, and rumination as transdiagnostic predictors of DSM-5 suicide risk. *PLOS ONE*, *16*(1), e0245562. <https://doi.org/10.1371/journal.pone.0245562>
- Hus, V., Gotham, K., & Lord, C. (2014). Standardizing ADOS Domain Scores: Separating Severity of Social Affect and Restricted and Repetitive Behaviors. *Journal of Autism and Developmental Disorders*, *44*(10), 2400–2412. <https://doi.org/10.1007/s10803-012-1719-1>
- Hus, V., & Lord, C. (2014). The Autism Diagnostic Observation Schedule, Module 4: Revised Algorithm and Standardized Severity Scores. *Journal of Autism and Developmental Disorders*, *44*(8), 1996–2012. <https://doi.org/10.1007/s10803-014-2080-3>



## SUBGROUPING BASED ON CO-OCCURRING CONDITIONS

25

- James, R. J. E., Dubey, I., Smith, D., Ropar, D., & Tunney, R. J. (2016). The Latent Structure of Autistic Traits: A Taxometric, Latent Class and Latent Profile Analysis of the Adult Autism Spectrum Quotient. *Journal of Autism and Developmental Disorders*, 46(12), 3712–3728. <https://doi.org/10.1007/s10803-016-2897-z>
- Jeste, S. S., & Geschwind, D. H. (2014). Disentangling the heterogeneity of autism spectrum disorder through genetic findings. *Nature Reviews Neurology*, 10(2), 74–81. <https://doi.org/10.1038/nrneurol.2013.278>
- Kaat, A. J., Gadow, K. D., & Lecavalier, L. (2013). Psychiatric Symptom Impairment in Children with Autism Spectrum Disorders. *Journal of Abnormal Child Psychology*, 41(6), 959–969. <https://doi.org/10.1007/s10802-013-9739-7>
- Kang, E., Gadow, K. D., & Lerner, M. D. (2020). Atypical Communication Characteristics, Differential Diagnosis, and the Autism Spectrum Disorder Phenotype in Youth. *Journal of Clinical Child & Adolescent Psychology*, 49(2), 251–263. <https://doi.org/10.1080/15374416.2018.1539912>
- Kerns, C. M., & Kendall, P. C. (2012). The presentation and classification of anxiety in autism spectrum disorder. *Clinical Psychology: Science and Practice*, 19(4), 323–347. <https://doi.org/10.1111/cpsp.12009>
- Kerns, C. M., Renno, P., Kendall, P. C., Wood, J. J., & Storch, E. A. (2017). Anxiety Disorders Interview Schedule–Autism Addendum: Reliability and Validity in Children With Autism Spectrum Disorder. *Journal of Clinical Child & Adolescent Psychology*, 46(1), 88–100. <https://doi.org/10.1080/15374416.2016.1233501>
- Kerns, C. M., Wood, J. J., Kendall, P. C., Renno, P., Crawford, E. A., Mercado, R. J., Fujii, C., Collier, A., Hoff, A., Kagan, E. R., Small, B. J., Lewin, A. B., & Storch, E. A. (2016). The Treatment of Anxiety in Autism Spectrum Disorder (TAASD) Study: Rationale, Design and Methods. *Journal of Child and Family Studies*, 25(6), 1889–1902. <https://doi.org/10.1007/s10826-016-0372-2>
- Kim, H., Keifer, C., Rodriguez-Seijas, C., Eaton, N., Lerner, M., & Gadow, K. (2019). Quantifying the Optimal Structure of the Autism Phenotype: A Comprehensive Comparison of Dimensional, Categorical, and Hybrid Models. *Journal of the American Academy of Child & Adolescent Psychiatry*, 58(9), 876–886.e2. <https://doi.org/10.1016/j.jaac.2018.09.431>

## SUBGROUPING BASED ON CO-OCCURRING CONDITIONS

26

- Kim, J. A., Szatmari, P., Bryson, S. E., Streiner, D. L., & Wilson, F. J. (2000). The Prevalence of Anxiety and Mood Problems among Children with Autism and Asperger Syndrome. *Autism, 4*(2), 117–132. <https://doi.org/10.1177/1362361300004002002>
- Kim, S. Y., & Lecavalier, L. (2021). Depression in young autistic people: A scoping review. *Research in Autism Spectrum Disorders, 88*, 101841. <https://doi.org/10.1016/j.rasd.2021.101841>
- Kushki, A., Drumm, E., Pla Mobarak, M., Tanel, N., Dupuis, A., Chau, T., & Anagnostou, E. (2013). Investigating the Autonomic Nervous System Response to Anxiety in Children with Autism Spectrum Disorders. *PLoS ONE, 8*(4), e59730. <https://doi.org/10.1371/journal.pone.0059730>
- Lai, M.-C., Kassee, C., Besney, R., Bonato, S., Hull, L., Mandy, W., Szatmari, P., & Ameis, S. H. (2019). Prevalence of co-occurring mental health diagnoses in the autism population: a systematic review and meta-analysis. *The Lancet Psychiatry, 6*(10), 819–829. [https://doi.org/10.1016/S2215-0366\(19\)30289-5](https://doi.org/10.1016/S2215-0366(19)30289-5)
- Lai, M.-C., Lombardo, M. V., Auyeung, B., Chakrabarti, B., & Baron-Cohen, S. (2015). Sex/Gender Differences and Autism: Setting the Scene for Future Research. *Journal of the American Academy of Child & Adolescent Psychiatry, 54*(1), 11–24. <https://doi.org/10.1016/j.jaac.2014.10.003>
- Landa, R. J., Gross, A. L., Stuart, E. A., & Bauman, M. (2012). Latent class analysis of early developmental trajectory in baby siblings of children with autism: Latent class analysis of developmental trajectories. *Journal of Child Psychology and Psychiatry, 53*(9), 986–996. <https://doi.org/10.1111/j.1469-7610.2012.02558.x>
- Lantz, B. (2013). The large sample size fallacy: *The large sample size fallacy*. *Scandinavian Journal of Caring Sciences, 27*(2), 487–492. <https://doi.org/10.1111/j.1471-6712.2012.01052.x>
- Lerner, M. D., De Los Reyes, A., Drabick, D. A. G., Gerber, A. H., & Gadow, K. D. (2017). Informant discrepancy defines discrete, clinically useful autism spectrum disorder subgroups. *Journal of Child Psychology and Psychiatry, 58*(7), 829–839. <https://doi.org/10.1111/jcpp.12730>
- Levy, S. E., Giarelli, E., Lee, L.-C., Schieve, L. A., Kirby, R. S., Cunniff, C., Nicholas, J., Reaven, J., & Rice, C. E. (2010). Autism Spectrum Disorder and Co-occurring Developmental, Psychiatric, and Medical Conditions Among Children in Multiple Populations of the United States. *Journal of Developmental & Behavioral Pediatrics, 31*(4), 267–275. <https://doi.org/10.1097/DBP.0b013e3181d5d03b>

## SUBGROUPING BASED ON CO-OCCURRING CONDITIONS

27

- Leyfer, O. T., Folstein, S. E., Bacalman, S., Davis, N. O., Dinh, E., Morgan, J., Tager-Flusberg, H., & Lainhart, J. E. (2006). Comorbid Psychiatric Disorders in Children with Autism: Interview Development and Rates of Disorders. *Journal of Autism and Developmental Disorders*, *36*(7), 849–861. <https://doi.org/10.1007/s10803-006-0123-0>
- Lindor, E., Sivaratnam, C., May, T., Stefanac, N., Howells, K., & Rinehart, N. (2019). Problem Behavior in Autism Spectrum Disorder: Considering Core Symptom Severity and Accompanying Sleep Disturbance. *Frontiers in Psychiatry*, *10*, 487. <https://doi.org/10.3389/fpsy.2019.00487>
- Linzer, D. A., & Lewis, J. B. (2011). **poLCA**: An R Package for Polytomous Variable Latent Class Analysis. *Journal of Statistical Software*, *42*(10). <https://doi.org/10.18637/jss.v042.i10>
- Lombardo, M. V., Lai, M.-C., & Baron-Cohen, S. (2019). Big data approaches to decomposing heterogeneity across the autism spectrum. *Molecular Psychiatry*, *24*(10), 1435–1450. <https://doi.org/10.1038/s41380-018-0321-0>
- Lord, C., Elsabbagh, M., Baird, G., & Veenstra-Vanderweele, J. (2018). Autism spectrum disorder. *The Lancet*, *392*(10146), 508–520. [https://doi.org/10.1016/S0140-6736\(18\)31129-2](https://doi.org/10.1016/S0140-6736(18)31129-2)
- Lord, C., Luyster, R., Guthrie, W., & Pickles, A. (2012). Patterns of developmental trajectories in toddlers with autism spectrum disorder. *Journal of Consulting and Clinical Psychology*, *80*(3), 477–489. <https://doi.org/10.1037/a0027214>
- Louwerse, A., Eussen, M. L. J. M., Van der Ende, J., de Nijs, P. F. A., Van Gool, A. R., Dekker, L. P., Verheij, C., Verheij, F., Verhulst, F. C., & Greaves-Lord, K. (2015). ASD Symptom Severity in Adolescence of Individuals Diagnosed with PDD-NOS in Childhood: Stability and the Relation with Psychiatric Comorbidity and Societal Participation. *Journal of Autism and Developmental Disorders*, *45*(12), 3908–3918. <https://doi.org/10.1007/s10803-015-2595-2>
- Mannon, A., & Leader, G. (2013). An analysis of the predictors of comorbid psychopathology, gastrointestinal symptoms and epilepsy in children and adolescents with autism spectrum disorder. *Research in Autism Spectrum Disorders*, *7*(12), 1663–1671. <https://doi.org/10.1016/j.rasd.2013.10.002>
- Matsushima, N., Miyawaki, D., Tsuji, H., Takahashi, K., Horino, A., Kawaguchi, T., Suzuki, F., & Kiriike, N. (2008). Evaluation of attention-deficit/hyperactivity disorder symptoms in male children with high-functioning pervasive developmental disorders. *Osaka City Medical Journal*, *54*(1), 1–10.

## SUBGROUPING BASED ON CO-OCCURRING CONDITIONS

28

- Mayes, S. D., Baweja, R., Waschbusch, D. A., & Calhoun, S. L. (2022). Relationship between IQ and Internalizing and Externalizing Symptoms in Children with Autism and Children with ADHD. *Journal of Mental Health Research in Intellectual Disabilities*, 1–16. <https://doi.org/10.1080/19315864.2022.2029643>
- Mazefsky, C. A., Herrington, J., Siegel, M., Scarpa, A., Maddox, B. B., Scahill, L., & White, S. W. (2013). The Role of Emotion Regulation in Autism Spectrum Disorder. *Journal of the American Academy of Child & Adolescent Psychiatry*, 52(7), 679–688. <https://doi.org/10.1016/j.jaac.2013.05.006>
- Mazefsky, C. A., Schreiber, D. R., Olino, T. M., & Minshew, N. J. (2014). The association between emotional and behavioral problems and gastrointestinal symptoms among children with high-functioning autism. *Autism*, 18(5), 493–501. <https://doi.org/10.1177/1362361313485164>
- McBride, N. M., Weinzimmer, S. A., La Buissonnière-Ariza, V., Schneider, S. C., Ehrenreich May, J., Lewin, A. B., McGuire, J. F., Goodman, W. K., Wood, J. J., & Storch, E. A. (2020). The Impact of Comorbidity on Cognitive-Behavioral Therapy Response in Youth with Anxiety and Autism Spectrum Disorder. *Child Psychiatry & Human Development*, 51(4), 625–635. <https://doi.org/10.1007/s10578-020-00961-2>
- Miller, M., Musser, E. D., Young, G. S., Olson, B., Steiner, R. D., & Nigg, J. T. (2019). Sibling Recurrence Risk and Cross-aggregation of Attention-Deficit/Hyperactivity Disorder and Autism Spectrum Disorder. *JAMA Pediatrics*, 173(2), 147. <https://doi.org/10.1001/jamapediatrics.2018.4076>
- Mosner, M. G., Kinard, J. L., Shah, J. S., McWeeny, S., Greene, R. K., Lowery, S. C., Mazefsky, C. A., & Dichter, G. S. (2019). Rates of Co-occurring Psychiatric Disorders in Autism Spectrum Disorder Using the Mini International Neuropsychiatric Interview. *Journal of Autism and Developmental Disorders*, 49(9), 3819–3832. <https://doi.org/10.1007/s10803-019-04090-1>
- Mullen, E. M. (1995). *Mullen scales of early learning* (pp. 58-64). Circle Pines, MN: American Guidance Service Inc.
- Murphy, O., Healy, O., & Leader, G. (2009). Risk factors for challenging behaviors among 157 children with autism spectrum disorder in Ireland. *Research in Autism Spectrum Disorders*, 3(2), 474–482. <https://doi.org/10.1016/j.rasd.2008.09.008>
- Muskens, J. B., Velders, F. P., & Staal, W. G. (2017). Medical comorbidities in children and adolescents with autism spectrum disorders and attention deficit hyperactivity disorders: a systematic review. *European Child & Adolescent Psychiatry*, 26(9), 1093–1103. <https://doi.org/10.1007/s00787-017-1020-0>

## SUBGROUPING BASED ON CO-OCCURRING CONDITIONS

29

- Muskett, A., Capriola-Hall, N. N., Radtke, S. R., Factor, R., & Scarpa, A. (2019). Repetitive behaviors in Autism Spectrum Disorder: Associations with depression and anxiety symptoms. *Research in Autism Spectrum Disorders*, 68, 101449. <https://doi.org/10.1016/j.rasd.2019.101449>
- Neuhaus, E., Bernier, R., & Beauchaine, T. P. (2014). Brief report: social skills, internalizing and externalizing symptoms, and respiratory sinus arrhythmia in autism. *Journal of Autism and Developmental Disorders*, 44(3), 730–737. <https://doi.org/10.1007/s10803-013-1923-7>
- Nordahl, C. W., Iosif, A.-M., Young, G. S., Hechtman, A., Heath, B., Lee, J. K., Libero, L., Reinhardt, V. P., Winder-Patel, B., Amaral, D. G., Rogers, S., Solomon, M., & Ozonoff, S. (2020). High Psychopathology Subgroup in Young Children With Autism: Associations With Biological Sex and Amygdala Volume. *Journal of the American Academy of Child & Adolescent Psychiatry*, 59(12), 1353-1363.e2. <https://doi.org/10.1016/j.jaac.2019.11.022>
- O'Brien, G., & Pearson, J. (2004). Autism and Learning Disability. *Autism*, 8(2), 125–140. <https://doi.org/10.1177/1362361304042718>
- Olino, T. M., Klein, D. N., Farmer, R. F., Seeley, J. R., & Lewinsohn, P. M. (2012). Examination of the structure of psychopathology using latent class analysis. *Comprehensive Psychiatry*, 53(4), 323–332. <https://doi.org/10.1016/j.comppsy.2011.05.008>
- Park, S., Cho, S.-C., Cho, I. H., Kim, B.-N., Kim, J.-W., Shin, M.-S., Chung, U.-S., Park, T.-W., Son, J.-W., & Yoo, H. J. (2012). Sleep problems and their correlates and comorbid psychopathology of children with autism spectrum disorders. *Research in Autism Spectrum Disorders*, 6(3), 1068–1072. <https://doi.org/10.1016/j.rasd.2012.02.004>
- Paruthi, S., Brooks, L. J., D'Ambrosio, C., Hall, W. A., Kotagal, S., Lloyd, R. M., Malow, B. A., Maski, K., Nichols, C., Quan, S. F., Rosen, C. L., Troester, M. M., & Wise, M. S. (2016). Recommended Amount of Sleep for Pediatric Populations: A Consensus Statement of the American Academy of Sleep Medicine. *Journal of Clinical Sleep Medicine*, 12(06), 785–786. <https://doi.org/10.5664/jcsm.5866>
- Parviainen, M., Aunola, K., Torppa, M., Poikkeus, A.-M., & Vasalampi, K. (2020). Symptoms of psychological ill-being and school dropout intentions among upper secondary education students: A person-centered approach. *Learning and Individual Differences*, 80, 101853. <https://doi.org/10.1016/j.lindif.2020.101853>

## SUBGROUPING BASED ON CO-OCCURRING CONDITIONS

30

- Porcu, M., & Giambona, F. (2017). Introduction to Latent Class Analysis With Applications. *The Journal of Early Adolescence*, 37(1), 129–158. <https://doi.org/10.1177/0272431616648452>
- Reaven, J. A. (2009). Children with high-functioning autism spectrum disorders and co-occurring anxiety symptoms: implications for assessment and treatment. *Journal for Specialists in Pediatric Nursing: JSPN*, 14(3), 192–199. <https://doi.org/10.1111/j.1744-6155.2009.00197.x>
- Restrepo, B., Angkustsiri, K., Taylor, S. L., Rogers, S. J., Cabral, J., Heath, B., Hechtman, A., Solomon, M., Ashwood, P., Amaral, D. G., & Nordahl, C. W. (2020). Developmental–behavioral profiles in children with autism spectrum disorder and co-occurring gastrointestinal symptoms. *Autism Research*, 13(10), 1778–1789. <https://doi.org/10.1002/aur.2354>
- Richdale, A. L., & Baglin, C. L. (2015). Self-report and caregiver-report of sleep and psychopathology in children with high-functioning autism spectrum disorder: A pilot study. *Developmental Neurorehabilitation*, 18(4), 272–279. <https://doi.org/10.3109/17518423.2013.829534>
- Rodriguez-Seijas, C., Gadow, K. D., Rosen, T. E., Kim, H., Lerner, M. D., & Eaton, N. R. (2020). A transdiagnostic model of psychiatric symptom co-occurrence and autism spectrum disorder. *Autism Research*, 13(4), 579–590. <https://doi.org/10.1002/aur.2228>
- Ronald, A., Larsson, H., Anckarsäter, H., & Lichtenstein, P. (2014). Symptoms of autism and ADHD: A Swedish twin study examining their overlap. *Journal of Abnormal Psychology*, 123(2), 440–451. <https://doi.org/10.1037/a0036088>
- Rosen, T. E., Mazefsky, C. A., Vasa, R. A., & Lerner, M. D. (2018). Co-occurring psychiatric conditions in autism spectrum disorder. *International Review of Psychiatry*, 30(1), 40–61. <https://doi.org/10.1080/09540261.2018.1450229>
- Rosen, T. E., Spaulding, C. J., Gates, J. A., & Lerner, M. D. (2019). Autism severity, co-occurring psychopathology, and intellectual functioning predict supportive school services for youth with autism spectrum disorder. *Autism*, 23(7), 1805–1816. <https://doi.org/10.1177/1362361318809690>
- Ruparelia, K., Manji, K., Abubakar, A., & Newton, C. R. (2017). Investigating the Evidence of Behavioral, Cognitive, and Psychiatric Endophenotypes in Autism: A Systematic Review. *Autism Research and Treatment*, 2017, 1–17. <https://doi.org/10.1155/2017/6346912>



## SUBGROUPING BASED ON CO-OCCURRING CONDITIONS

31

- Salazar, F., Baird, G., Chandler, S., Tseng, E., O'sullivan, T., Howlin, P., Pickles, A., & Simonoff, E. (2015). Co-occurring Psychiatric Disorders in Preschool and Elementary School-Aged Children with Autism Spectrum Disorder. *Journal of Autism and Developmental Disorders*, *45*(8), 2283–2294. <https://doi.org/10.1007/s10803-015-2361-5>
- Sikora, D. M., Vora, P., Coury, D. L., & Rosenberg, D. (2012). Attention-Deficit/Hyperactivity Disorder Symptoms, Adaptive Functioning, and Quality of Life in Children With Autism Spectrum Disorder. *Pediatrics*, *130*(Supplement 2), S91–S97. <https://doi.org/10.1542/peds.2012-0900G>
- Simonoff, E., Jones, C. R. G., Baird, G., Pickles, A., Happé, F., & Charman, T. (2013). The persistence and stability of psychiatric problems in adolescents with autism spectrum disorders. *Journal of Child Psychology and Psychiatry*, *54*(2), 186–194. <https://doi.org/10.1111/j.1469-7610.2012.02606.x>
- Simonoff, E., Pickles, A., Charman, T., Chandler, S., Loucas, T., & Baird, G. (2008). Psychiatric Disorders in Children With Autism Spectrum Disorders: Prevalence, Comorbidity, and Associated Factors in a Population-Derived Sample. *Journal of the American Academy of Child & Adolescent Psychiatry*, *47*(8), 921–929. <https://doi.org/10.1097/CHI.0b013e318179964f>
- Sinzig, J., Bruning, N., Morsch, D., & Lehmkuhl, G. (2008). Attention profiles in autistic children with and without comorbid hyperactivity and attention problems. *Acta Neuropsychiatrica*, *20*(4), 207–215. <https://doi.org/10.1111/j.1601-5215.2008.00292.x>
- Sinzig, J., Walter, D., & Doepfner, M. (2009). Attention Deficit/Hyperactivity Disorder in Children and Adolescents With Autism Spectrum Disorder: Symptom or Syndrome? *Journal of Attention Disorders*, *13*(2), 117–126. <https://doi.org/10.1177/1087054708326261>
- Snow, A. V., & Lecavalier, L. (2011). Comparing Autism, PDD-NOS, and Other Developmental Disabilities on Parent-Reported Behavior Problems: Little Evidence for ASD Subtype Validity. *Journal of Autism and Developmental Disorders*, *41*(3), 302–310. <https://doi.org/10.1007/s10803-010-1054-3>
- Soke, G. N., Maenner, M. J., Christensen, D., Kurzius-Spencer, M., & Schieve, L. A. (2018). Prevalence of Co-occurring Medical and Behavioral Conditions/Symptoms Among 4- and 8-Year-Old Children with Autism Spectrum Disorder in Selected Areas of the United States in 2010. *Journal of Autism and Developmental Disorders*, *48*(8), 2663–2676. <https://doi.org/10.1007/s10803-018-3521-1>

## SUBGROUPING BASED ON CO-OCCURRING CONDITIONS

32

- Solmi, M., Radua, J., Olivola, M., Croce, E., Soardo, L., Salazar de Pablo, G., Il Shin, J., Kirkbride, J. B., Jones, P., Kim, J. H., Kim, J. Y., Carvalho, A. F., Seeman, M. V., Correll, C. U., & Fusar-Poli, P. (2021). Age at onset of mental disorders worldwide: large-scale meta-analysis of 192 epidemiological studies. *Molecular Psychiatry*, 1–15. <https://doi.org/10.1038/s41380-021-01161-7>
- Solomon, M., Miller, M., Taylor, S. L., Hinshaw, S. P., & Carter, C. S. (2012). Autism Symptoms and Internalizing Psychopathology in Girls and Boys with Autism Spectrum Disorders. *Journal of Autism and Developmental Disorders*, 42(1), 48–59. <https://doi.org/10.1007/s10803-011-1215-z>
- Sprenger, L., Bühler, E., Poustka, L., Bach, C., Heinzl-Gutenbrunner, M., Kamp-Becker, I., & Bachmann, C. (2013). Impact of ADHD symptoms on autism spectrum disorder symptom severity. *Research in Developmental Disabilities*, 34(10), 3545–3552. <https://doi.org/10.1016/j.ridd.2013.07.028>
- Strang, J. F., Kenworthy, L., Daniolos, P., Case, L., Wills, M. C., Martin, A., & Wallace, G. L. (2012). Depression and anxiety symptoms in children and adolescents with autism spectrum disorders without intellectual disability. *Research in Autism Spectrum Disorders*, 6(1), 406–412. <https://doi.org/10.1016/j.rasd.2011.06.015>
- Tye, C., Runicles, A. K., Whitehouse, A. J. O., & Alvares, G. A. (2019). Characterizing the Interplay Between Autism Spectrum Disorder and Comorbid Medical Conditions: An Integrative Review. *Frontiers in Psychiatry*, 9, 751. <https://doi.org/10.3389/fpsy.2018.00751>
- van Steensel, F. J. A., Bögels, S. M., & Perrin, S. (2011). Anxiety Disorders in Children and Adolescents with Autistic Spectrum Disorders: A Meta-Analysis. *Clinical Child and Family Psychology Review*, 14(3), 302–317. <https://doi.org/10.1007/s10567-011-0097-0>
- van Steensel, F. J. A., & Heeman, E. J. (2017). Anxiety Levels in Children with Autism Spectrum Disorder: A Meta-Analysis. *Journal of Child and Family Studies*, 26(7), 1753–1767. <https://doi.org/10.1007/s10826-017-0687-7>
- Veatch, O. J., Maxwell-Horn, A. C., & Malow, B. A. (2015). Sleep in Autism Spectrum Disorders. *Current Sleep Medicine Reports*, 1(2), 131–140. <https://doi.org/10.1007/s40675-015-0012-1>
- Veatch, O. J., Sutcliffe, J. S., Warren, Z. E., Keenan, B. T., Potter, M. H., & Malow, B. A. (2017). Shorter sleep duration is associated with social impairment and comorbidities in ASD: Sleep duration relates to social impairment. *Autism Research*, 10(7), 1221–1238. <https://doi.org/10.1002/aur.1765>



## SUBGROUPING BASED ON CO-OCCURRING CONDITIONS

33

- Wang, L. W., Tancredi, D. J., & Thomas, D. W. (2011). The Prevalence of Gastrointestinal Problems in Children Across the United States With Autism Spectrum Disorders From Families With Multiple Affected Members. *Journal of Developmental & Behavioral Pediatrics, 32*(5), 351–360.  
<https://doi.org/10.1097/DBP.0b013e31821bd06a>
- Weber, R. J., & Gadow, K. D. (2017). Relation of Psychiatric Symptoms with Epilepsy, Asthma, and Allergy in Youth with ASD vs. Psychiatry Referrals. *Journal of Abnormal Child Psychology, 45*(6), 1247–1257.  
<https://doi.org/10.1007/s10802-016-0212-2>
- Weiss, J. A. (2014). Transdiagnostic case conceptualization of emotional problems in youth with ASD: An emotion regulation approach. *Clinical Psychology: Science and Practice, 21*(4), 331–350.  
<https://doi.org/10.1111/cpsp.12084>
- White, S. W., Oswald, D., Ollendick, T., & Scahill, L. (2009). Anxiety in children and adolescents with autism spectrum disorders. *Clinical Psychology Review, 29*(3), 216–229.  
<https://doi.org/10.1016/j.cpr.2009.01.003>
- Wickstrom, J., Dell'Armo, K., Salzman, E., Hooker, J. L., Delehanty, A., Bishop, S., Tassé, M. J., Wetherby, A. M., Piergies, A. M. H., Damiano, D., Rauch, A., & Thurm, A. (2021). Systematic Review: Recommendations for Rehabilitation in ASD and ID From Clinical Practice Guidelines. *Archives of Rehabilitation Research and Clinical Translation, 3*(3), 100140.  
<https://doi.org/10.1016/j.arrct.2021.100140>
- Wiggins, L. D., Tian, L. H., Levy, S. E., Rice, C., Lee, L.-C., Schieve, L., Pandey, J., Daniels, J., Blaskey, L., Hepburn, S., Landa, R., Edmondson-Pretzel, R., & Thompson, W. (2017). Homogeneous Subgroups of Young Children with Autism Improve Phenotypic Characterization in the Study to Explore Early Development. *Journal of Autism and Developmental Disorders, 47*(11), 3634–3645.  
<https://doi.org/10.1007/s10803-017-3280-4>
- Wood, J. J., & Gadow, K. D. (2010). Exploring the nature and function of anxiety in youth with autism spectrum disorders. *Clinical Psychology: Science and Practice, 17*(4), 281–292.  
<https://doi.org/10.1111/j.1468-2850.2010.01220.x>

## SUBGROUPING BASED ON CO-OCCURRING CONDITIONS

34

Xue Ming, Brimacombe, M., Chaaban, J., Zimmerman-Bier, B., & Wagner, G. C. (2008). Autism Spectrum Disorders: Concurrent Clinical Disorders. *Journal of Child Neurology*, 23(1), 6–13.

<https://doi.org/10.1177/0883073807307102>

Yoshida, Y., & Uchiyama, T. (2004). The clinical necessity for assessing Attention Deficit/Hyperactivity Disorder (AD/HD) symptoms in children with high-functioning Pervasive Developmental Disorder (PDD).

*European Child & Adolescent Psychiatry*, 13(5), 307–314. <https://doi.org/10.1007/s00787-004-0391-1>

Zablotsky, B., Bramlett, M. D., & Blumberg, S. J. (2020). The Co-Occurrence of Autism Spectrum Disorder in Children With ADHD. *Journal of Attention Disorders*, 24(1), 94–103.

<https://doi.org/10.1177/1087054717713638>

Zhang, Z., Abarda, A., Contractor, A. A., Wang, J., & Dayton, C. M. (2018). Exploring heterogeneity in clinical trials with latent class analysis. *Annals of Translational Medicine*, 6(7), 119–119.

<https://doi.org/10.21037/atm.2018.01.24>

Zheng, S., Hume, K. A., Able, H., Bishop, S. L., & Boyd, B. A. (2020). Exploring Developmental and Behavioral Heterogeneity among Preschoolers with ASD: A Cluster Analysis on Principal Components.

*Autism Research*, 13(5), 796–809. <https://doi.org/10.1002/aur.2263>

**Figure 1**

*Flowchart illustrating the participant selection process for all analyses.*

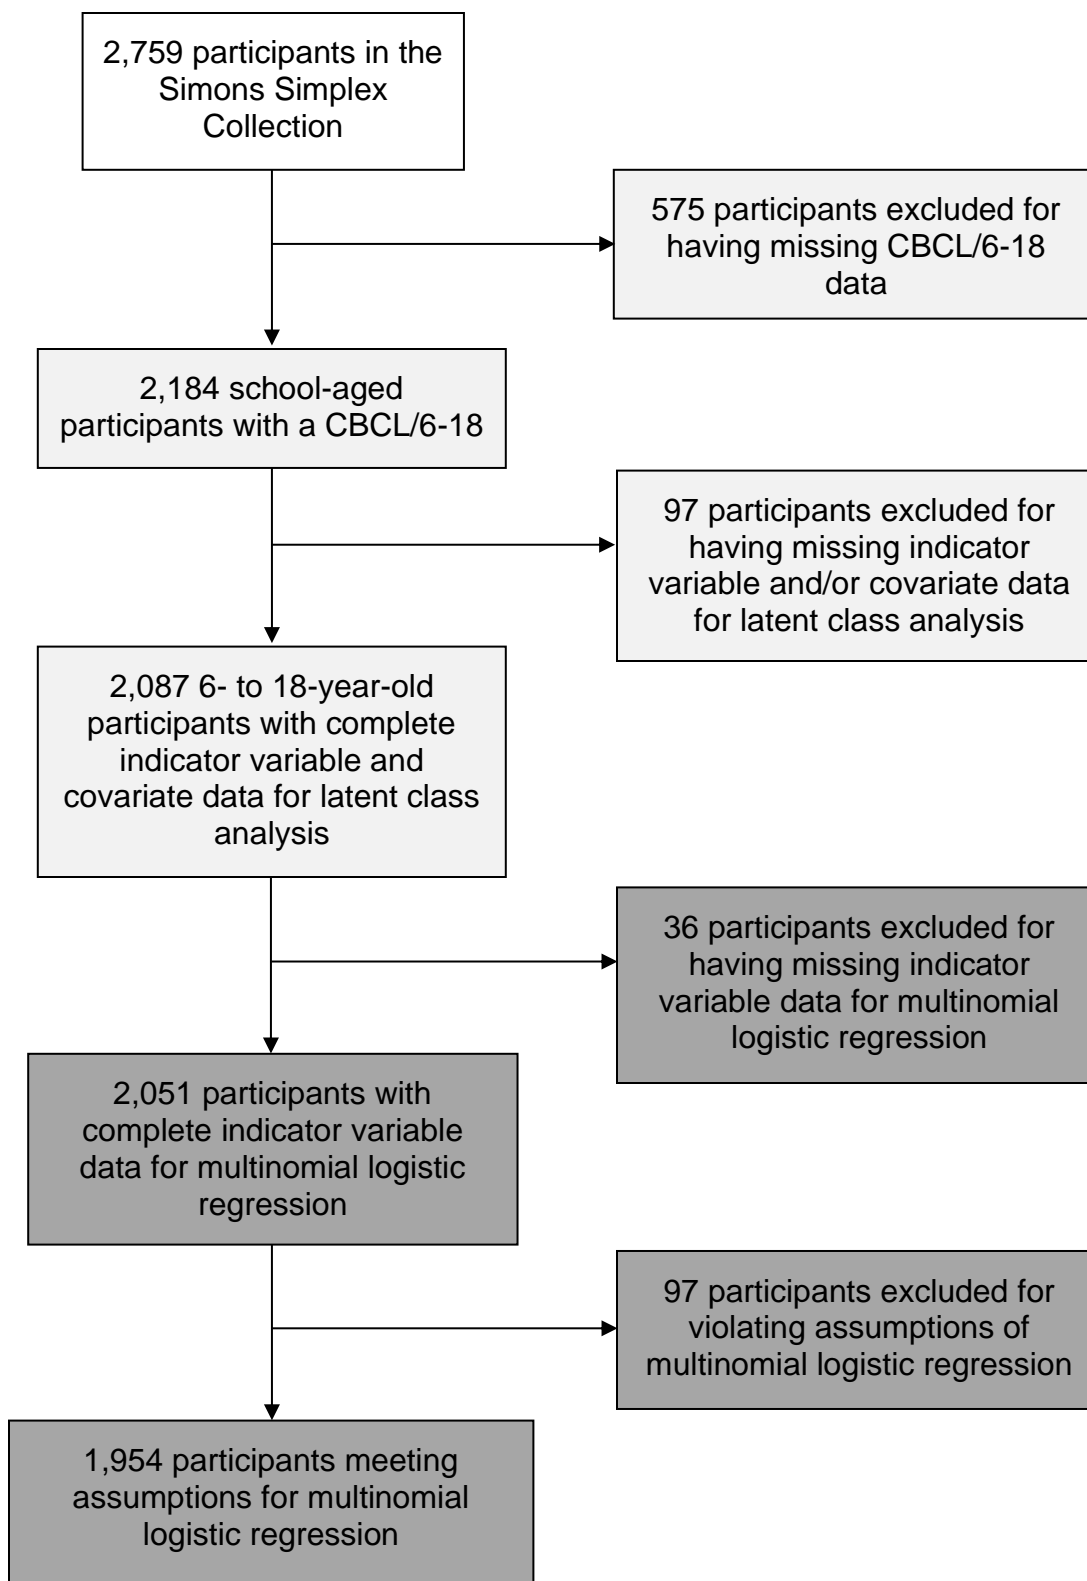

**Table 1***Demographic and clinical characteristics of all four latent classes.*

| Sample Descriptives             | Low Psychiatric Symptoms |       | Externalizing Symptoms |       | Internalizing Symptoms |       | High Psychiatric Symptoms |       | Total Sample |       |
|---------------------------------|--------------------------|-------|------------------------|-------|------------------------|-------|---------------------------|-------|--------------|-------|
|                                 | n                        | %     | n                      | %     | n                      | %     | n                         | %     | n            | %     |
| Sample Size                     | 856                      | 41.02 | 258                    | 12.36 | 659                    | 31.58 | 314                       | 15.05 | 2,087        | 100   |
| Sex (males)                     | 723                      | 84.46 | 195                    | 75.58 | 611                    | 92.72 | 279                       | 88.85 | 1,808        | 86.63 |
| Age <sup>a</sup> (years)        | 10.14                    | 3.23  | 9.47                   | 2.73  | 10.93                  | 3.14  | 10.11                     | 2.85  | 10.30        | 3.12  |
| ADOS CSS <sup>a</sup>           | 7.49                     | 1.72  | 7.38                   | 1.69  | 7.52                   | 1.70  | 7.36                      | 1.66  | 7.47         | 1.70  |
| NVIQ <sup>a</sup>               | 82.88                    | 26.76 | 84.53                  | 27.83 | 87.08                  | 26.17 | 85.02                     | 25.62 | 84.73        | 26.59 |
| Indicator Variables             |                          |       |                        |       |                        |       |                           |       |              |       |
| ADHD Problems                   | 138                      | 16.12 | 146                    | 56.59 | 267                    | 40.52 | 256                       | 81.53 | 807          | 38.67 |
| Affective Problems              | 52                       | 6.07  | 108                    | 41.86 | 369                    | 56.00 | 280                       | 89.17 | 809          | 38.76 |
| Anxiety Problems                | 44                       | 5.14  | 22                     | 8.53  | 559                    | 84.83 | 311                       | 99.04 | 936          | 44.85 |
| Conduct Problems                | 0                        | 0     | 162                    | 62.79 | 3                      | 0.46  | 241                       | 76.75 | 406          | 19.45 |
| Oppositional Defiant Problems   | 0                        | 0     | 177                    | 68.60 | 88                     | 13.35 | 279                       | 88.85 | 544          | 26.07 |
| NVIQ < 70                       | 239                      | 27.92 | 68                     | 26.36 | 141                    | 21.40 | 68                        | 21.66 | 516          | 24.72 |
| Atypical Sleep Duration         | 178                      | 20.79 | 64                     | 24.81 | 166                    | 25.19 | 93                        | 29.62 | 501          | 24.01 |
| Allergies/Autoimmune Conditions | 376                      | 43.93 | 121                    | 46.90 | 332                    | 50.38 | 163                       | 51.91 | 992          | 47.53 |
| Gastrointestinal Conditions     | 232                      | 27.10 | 89                     | 34.50 | 227                    | 34.45 | 116                       | 36.94 | 664          | 31.82 |
| Neurological Conditions         | 183                      | 21.38 | 72                     | 27.91 | 176                    | 26.71 | 86                        | 27.39 | 517          | 24.77 |

<sup>a</sup> Age, ADOS CSS, and NVIQ are described using mean and standard deviation rather than number (n) and percent (%).

**Table 2***Goodness-of-fit criteria for all six latent class models.*

| Model   | <i>df</i> | AIC       | BIC       | Entropy | Smallest Class (%) |
|---------|-----------|-----------|-----------|---------|--------------------|
| 1-class | 26        | 12,904.46 | 12,932.68 | 3.09    | NA                 |
| 2-class | 18        | 11,609.27 | 11,682.64 | 2.80    | 34.61              |
| 3-class | 10        | 11,495.77 | 11,614.28 | 2.75    | 25.97              |
| 4-class | 2         | 11,440.13 | 11,603.79 | 2.74    | 14.55              |
| 5-class | -6        | 11,473.61 | 11,682.42 | 2.74    | 0                  |
| 6-class | -14       | 11,611.02 | 11,864.98 | 2.77    | 0                  |

*Note.* Latent class analysis was conducted with five *DSM*-Oriented Scales of the Child Behavior Checklist for Ages 6 to 18 (Anxiety Problems, Affective Problems, Attention Deficit/Hyperactivity Problems, Conduct Problems, and Oppositional Defiant Problems) as indicator variables. Age and sex were used as covariates.

Figure 2

Percent of participants in each latent class with borderline/clinical levels of co-occurring psychiatric symptoms.

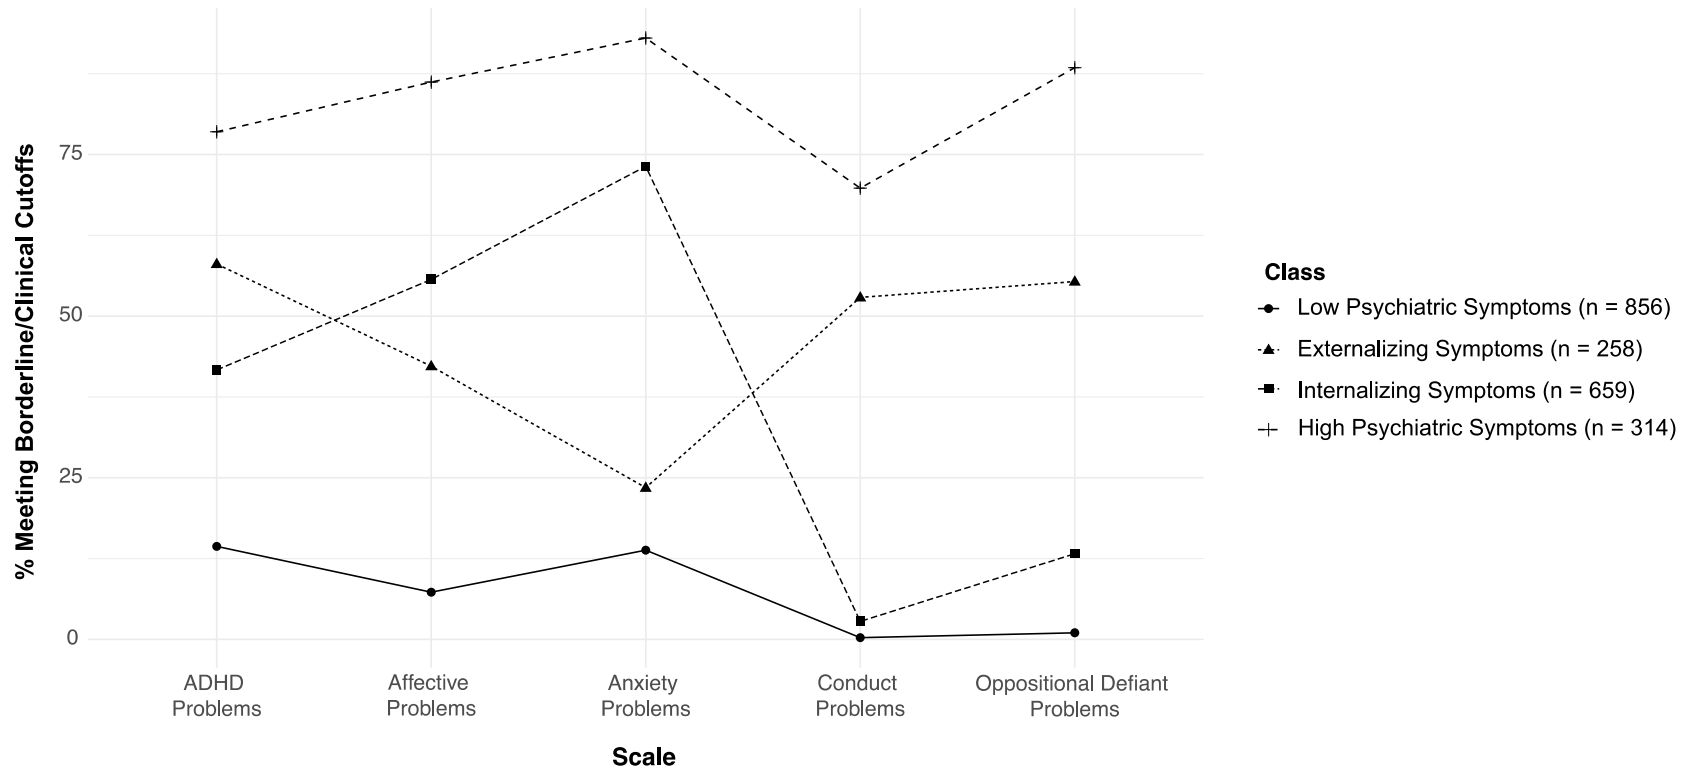

Note. Latent class analysis was conducted with five DSM-Oriented Scales of the Child Behavior Checklist for Ages 6 to 18 (Anxiety Problems, Affective Problems, Attention-Deficit/Hyperactivity Problems, Conduct Problems, and Oppositional Defiant Problems) as indicator variables. Age and sex were used as covariates.

**Table 3**

Odds ratios (OR) and 95% confidence intervals (95% CI) describing the relationship between indicator variables and latent class membership.

| Indicator Variables             | Externalizing Symptoms<br>(n = 189) |           | Internalizing Symptoms<br>(n = 648) |           | High Psychiatric Symptoms<br>(n = 274) |            |
|---------------------------------|-------------------------------------|-----------|-------------------------------------|-----------|----------------------------------------|------------|
|                                 | OR                                  | 95% CI    | OR                                  | 95% CI    | OR                                     | 95% CI     |
| Allergies/Autoimmune Conditions | 1.43*                               | 1.03-1.98 | 1.27*                               | 1.03-1.57 | 1.46**                                 | 1.10-1.93  |
| Atypical Sleep Duration         | <b>2.07***</b>                      | 1.45-2.94 | 1.37*                               | 1.07-1.75 | <b>2.15***</b>                         | 1.58 -2.93 |
| Gastrointestinal Conditions     | <b>2.11***</b>                      | 1.51-2.94 | 1.39**                              | 1.11-1.75 | <b>1.90***</b>                         | 1.41-2.55  |
| Neurological Conditions         | <b>2.15***</b>                      | 1.52-3.05 | 1.39**                              | 1.09-1.77 | 1.58**                                 | 1.15-2.17  |
| NVIQ < 70                       | .72                                 | .49-1.05  | <b>.63***</b>                       | .49-.81   | <b>.42***</b>                          | .29-.61    |

Note. The *Low Psychiatric Symptoms* subgroup was compared to the *Externalizing Symptoms*, *Internalizing Symptoms*, and *High Psychiatric Symptoms* subgroups. For each indicator variable, the reference group was 0, meaning that participants did not have a NVIQ < 70, atypical sleep duration, or a history of at least one gastrointestinal, neurological, or allergy/autoimmune condition. The degree of ASD-related diagnostic features, measured by ADOS CSS data, was used as a covariate. 97 outliers were excluded for violating the assumptions of multinomial logistic regression.

\*p<.05. \*\*p<.01. \*\*\*p <.001.
