# Supplementary material for: Subgrouping School-Aged Children on the Autism Spectrum Based on Co-Occurring Psychiatric Symptoms
Source: bioRxiv or medRxiv preprint supplement (doi:10.1101/2021.07.19.21260784), 2022-04-01
Supplement: Supplementary file [file media-1.pdf]

### Supplementary File

This file belongs to the article: “Subgrouping School-Aged Children on the Autism Spectrum Based on Co-Occurring Psychiatric Symptoms” (Piergies et al., *submitted*). It contains results from the four-class-solution latent class analysis which used all six *DSM*-Oriented Scales of the Child Behavior Checklist for Ages 6 to 18 as indicator variables and age and sex as covariates (Supplementary Table 1, Figure 1), frequency tables showing the number and percent of participants with histories of at least one of the medical conditions mentioned in our study (Supplementary Table 2, Table 3), additional goodness-of-fit criteria for the four-class-solution latent class analysis which used five *DSM*-Oriented Scales of the Child Behavior Checklist for Ages 6 to 18 as indicator variables and age and sex as covariates (Supplementary Table 4, Figure 2), results from a sensitivity analysis comparing fit indices between our three- and four-class models which used five *DSM*-Oriented Scales of the Child Behavior Checklist for Ages 6 to 18 as indicator variables and age and sex as covariates after 1,000 repetitions with a subset of 1,000 participants comprising the validation sample (Supplementary Figure 3), a graph illustrating the three-class model which used five *DSM*-Oriented Scales of the Child Behavior Checklist for Ages 6 to 18 as indicator variables and age and sex as covariates (Supplementary Figure 4), frequency tables showing endorsement rates ( $\geq 1\%$ ) of conditions within medical condition categories and psychiatric symptom-based subgroups (Supplementary Tables 5, 6, and 7), and our manually-cleaned “current sleep duration” variable (Supplementary Table 8).

**Supplementary Table 1**

*Goodness-of-fit criteria for all six latent class models.*

| Model   | <i>df</i> | AIC       | BIC       | Entropy | Smallest Class (%) |
|---------|-----------|-----------|-----------|---------|--------------------|
| 1-class | 57        | 14,676.54 | 14,710.4  | 3.51    | NA                 |
| 2-class | 48        | 13,252.17 | 13,336.82 | 3.19    | 37.40              |
| 3-class | 39        | 13,103.05 | 13,238.48 | 3.14    | 22.19              |
| 4-class | 30        | 13,039.47 | 13,225.69 | 3.12    | 14.74              |
| 5-class | 21        | 13,049.75 | 13,286.76 | 3.12    | 2.40               |
| 6-class | 12        | 13,223.22 | 13,511.01 | 3.18    | 1.29               |

*Note.* Latent class analysis was conducted with all six *DSM*-Oriented Scales of the Child Behavior Checklist for Ages 6 to 18 (Anxiety Problems, Affective Problems, Attention Deficit/Hyperactivity Problems, Conduct Problems, Oppositional Defiant Problems, and Somatic Problems) as indicator variables. Age and sex were used as covariates.

### Supplementary Figure 1

Percent of participants in each latent class with borderline/clinical levels of co-occurring psychiatric symptoms.

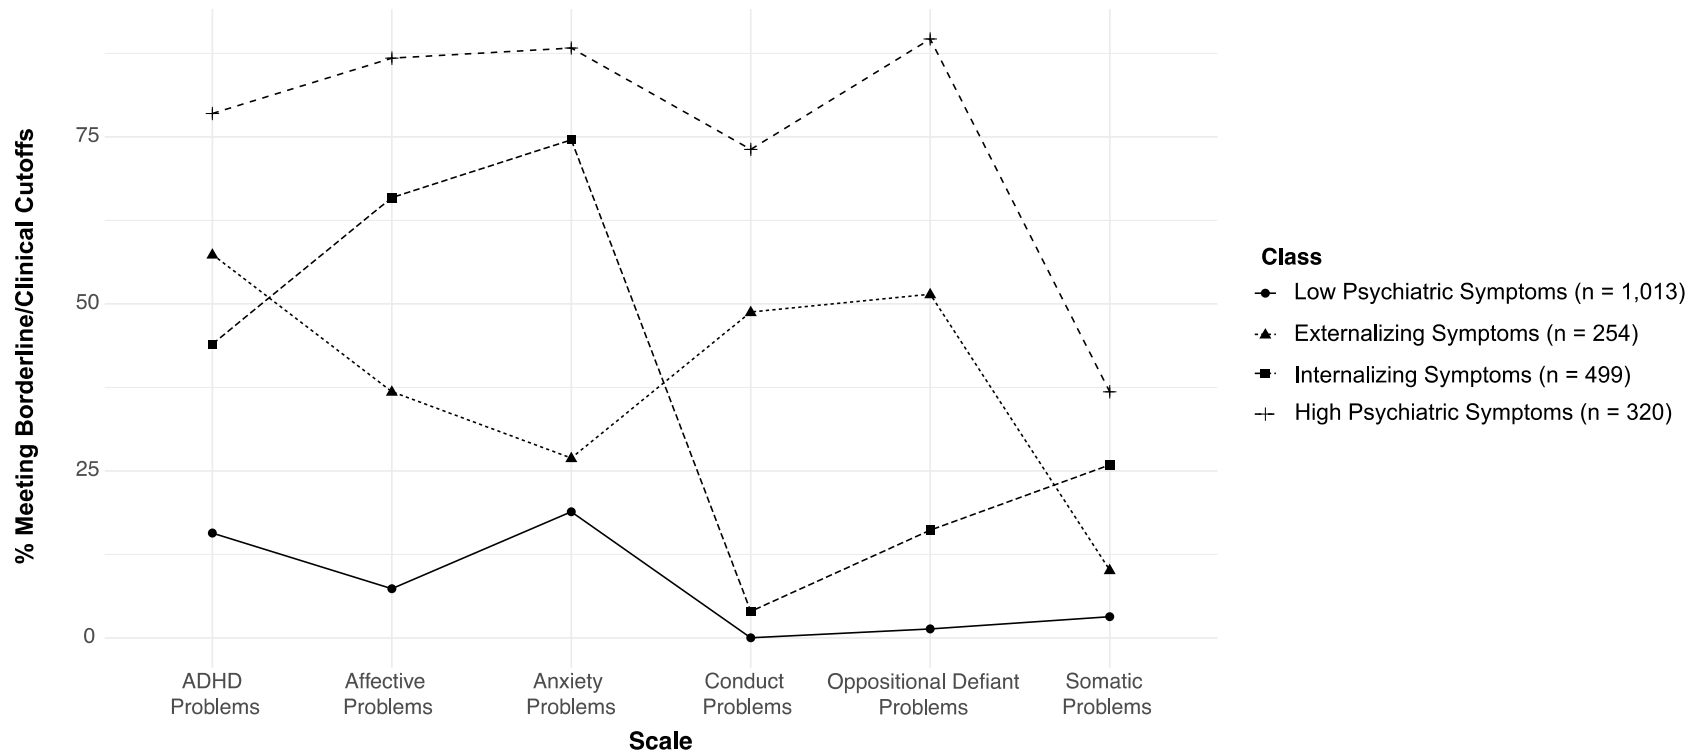

*Note.* Latent class analysis was conducted with all six *DSM*-Oriented Scales of the Child Behavior Checklist for Ages 6 to 18 (Anxiety Problems, Affective Problems, Attention Deficit/Hyperactivity Problems, Conduct Problems, Oppositional Defiant Problems, and Somatic Problems) as indicator variables. Age and sex were used as covariates.

**Supplementary Table 2**

*Number (n) and percent (%) of participants whose caregiver(s) endorsed a history of each medical condition grouped into one of six larger categories: Cancer, Chronic Illnesses, Diseases & Surgeries, Genetic Conditions, Hearing/Vision Problems, and Heart Disease.*

| Broader Category        | Endorsed |      |
|-------------------------|----------|------|
|                         | n        | %    |
| Cancer                  | 2        | 0.1  |
| Chronic Illnesses       | 30       | 1.44 |
| Diseases & Surgeries    | 1,814    | 86.9 |
| Genetic Conditions      | 21       | 1    |
| Hearing/Vision Problems | 115      | 5.5  |
| Heart Disease           | 4        | 0.19 |

**Supplementary Table 3**

Number of participants whose caregiver(s) endorsed a history of each medical condition grouped into one of three larger categories:

Allergies/Autoimmune Conditions, Gastrointestinal Conditions, and Neurological Conditions.

| Allergies/Autoimmune Conditions           |          |     | Gastrointestinal Conditions          |          |       | Neurological Conditions                       |          |       |
|-------------------------------------------|----------|-----|--------------------------------------|----------|-------|-----------------------------------------------|----------|-------|
| Disease Name                              | Endorsed |     | Disease Name                         | Endorsed |       | Disease Name                                  | Endorsed |       |
|                                           | Yes      | NA  |                                      | Yes      | NA    |                                               | Yes      | NA    |
| Adrenal insufficiency (Addison's disease) | 2        | 118 | Bloating (problematic)               | 54       | 1,989 | Cerebral palsy                                | 6        | 2,078 |
| Allergies and/or reactions to medications | 290      | 10  | Constipation (problematic)           | 382      | 1,541 | Cranial nerve disorder (e.g., Bell's Palsy)   | 2        | 2,085 |
| Asthma                                    | 215      | 143 | Diarrhea (problematic)               | 140      | 1,858 | CT/MRI scan done <sup>a</sup>                 | 40       | 1,576 |
| Bowel disorders                           | 42       | 122 | Excessive gas (problematic)          | 67       | 1,916 | EEG done <sup>a</sup>                         | 82       | 1,582 |
| Celiac disease                            | 10       | 117 | Gastric ulcers                       | 3        | 2,083 | Encephalitis                                  | 2        | 2,085 |
| Diabetes mellitus type I                  | 1        | 132 | Gastroesophageal reflux              | 138      | 1,894 | Excessively clumsy/uncoordinated <sup>b</sup> | 169      | 1,660 |
| Diabetes mellitus type II                 | 0        | 147 | Inflammatory bowel disease           | 2        | 2,081 | Febrile seizures (with fever)                 | 65       | 2,022 |
| Food allergies                            | 300      | 8   | Irritable bowel syndrome             | 11       | 2,068 | Head injury/loss of consciousness             | 86       | 1,963 |
| Environmental allergies                   | 570      | 9   | Severe abdominal pain                | 68       | 1,963 | Meningitis                                    | 8        | 2,076 |
| Hashimoto's thyroiditis                   | 2        | 120 | Ulcerative colitis                   | 4        | 2,081 | Movement abnormalities (e.g., tremor)         | 34       | 2,014 |
| Hyperthyroidism                           | 2        | 128 | Unusual stools (problematic)         | 116      | 1,874 | PET scan done <sup>a</sup>                    | 1        | 2,072 |
| Hypothyroidism                            | 11       | 140 | Vomiting (problematic)               | 68       | 1,973 | Positive lead screening                       | 23       | 2,054 |
| Multiple sclerosis                        | 1        | 120 | Other gastrointestinal condition (1) | 47       | 2024  | Seizures                                      | 117      | 1,970 |
| Psoriasis                                 | 20       | 122 | Other gastrointestinal condition (2) | 2        | 2090  | Stroke                                        | 0        | 144   |
| Rheumatoid arthritis (adult)              | 1        | 141 |                                      |          |       | Tic's/Tourette's                              | 51       | 1,961 |
| Rheumatoid arthritis (juvenile)           | 1        | 118 |                                      |          |       | Tuberous sclerosis                            | 1        | 2,085 |
| Systemic lupus erythematosus              | 1        | 121 |                                      |          |       |                                               |          |       |
| Other autoimmune condition                | 26       | 129 |                                      |          |       |                                               |          |       |

<sup>a</sup>In the case of "CT/MRI done," "EEG done," and "PET done," only participants who had an atypical scan were marked as having at least one condition in the larger category.

<sup>b</sup>Being "excessively clumsy/uncoordinated" was only considered to be a neurological condition if the participant was subsequently diagnosed with a neurological condition.

**Supplementary Table 4**

*Extensive goodness-of-fit criteria for two- through six-class models estimated using latent class analysis.*

| Model   | <i>df</i> | Gsq    | Llik     | AIC      | AICc     | cAIC     | mAIC     | BIC      | aBIC     | HQ       | HT       | Entropy | Smallest Class (%) |
|---------|-----------|--------|----------|----------|----------|----------|----------|----------|----------|----------|----------|---------|--------------------|
| 2-class | 18        | 189.39 | -5791.64 | 11609.27 | 11609.44 | 11695.68 | 11622.27 | 11682.68 | 11641.38 | 11636.16 | 11609.48 | 3.19    | 37.40              |
| 3-class | 10        | 65.95  | -5726.88 | 11495.77 | 11496.20 | 11635.34 | 11516.77 | 11614.34 | 11547.62 | 11539.21 | 11496.26 | 3.14    | 22.19              |
| 4-class | 2         | 10.28  | -5691.07 | 11440.13 | 11440.95 | 11632.88 | 11469.13 | 11603.88 | 11511.74 | 11500.12 | 11441.04 | 3.12    | 14.74              |
| 5-class | -6        | 7.55   | -5685.83 | 11445.66 | 11446.99 | 11691.58 | 11482.66 | 11654.58 | 11537.02 | 11522.19 | 11447.10 | 3.12    | 2.40               |
| 6-class | -14       | 189.39 | -5791.64 | 11673.27 | 11675.25 | 11972.36 | 11718.27 | 11927.36 | 11784.39 | 11766.36 | 11675.39 | 3.18    | 1.29               |

*Note.* Latent class analysis was conducted with five *DSM*-Oriented Scales of the Child Behavior Checklist for Ages 6 to 18 (Anxiety Problems, Affective Problems, Attention Deficit/Hyperactivity Problems, Conduct Problems, and Oppositional Defiant Problems) as indicator variables. Age and sex were used as covariates.

**Supplementary Figure 2**

*Extensive goodness-of-fit criteria for two- through six-class models estimated using latent class analysis.*

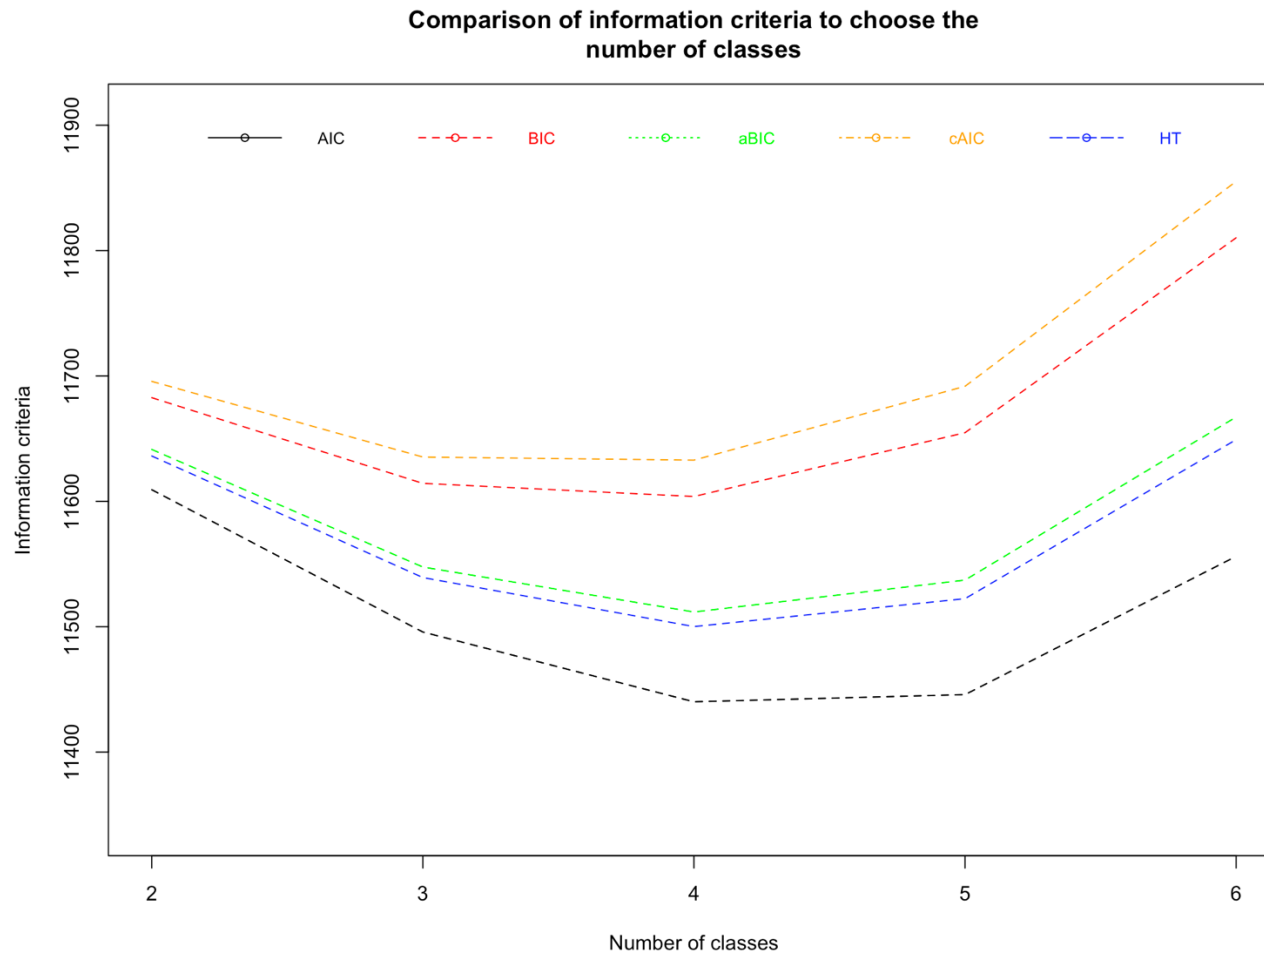



**Supplementary Figure 3**

Goodness-of-fit criteria for a randomly selected subset of 1,000 participants from the entire latent class analysis sample ( $n = 2,087$ ) with 1,000 estimations of one to six latent classes.

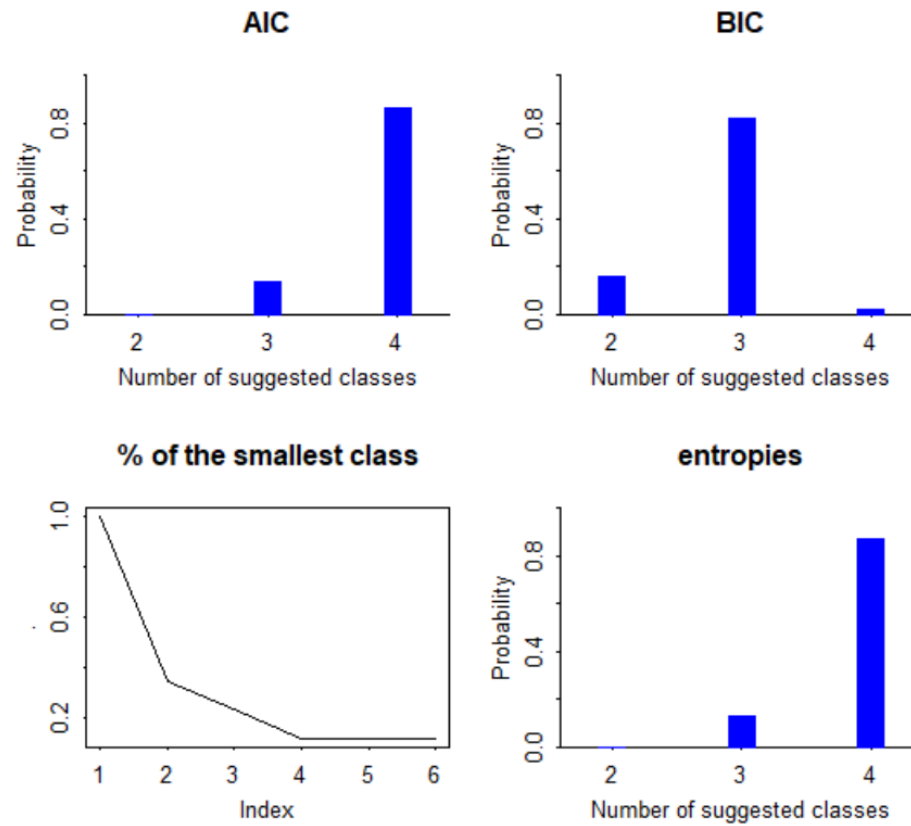

### Supplementary Figure 4

Percent of participants in each latent class with borderline/clinical levels of co-occurring psychiatric symptoms.

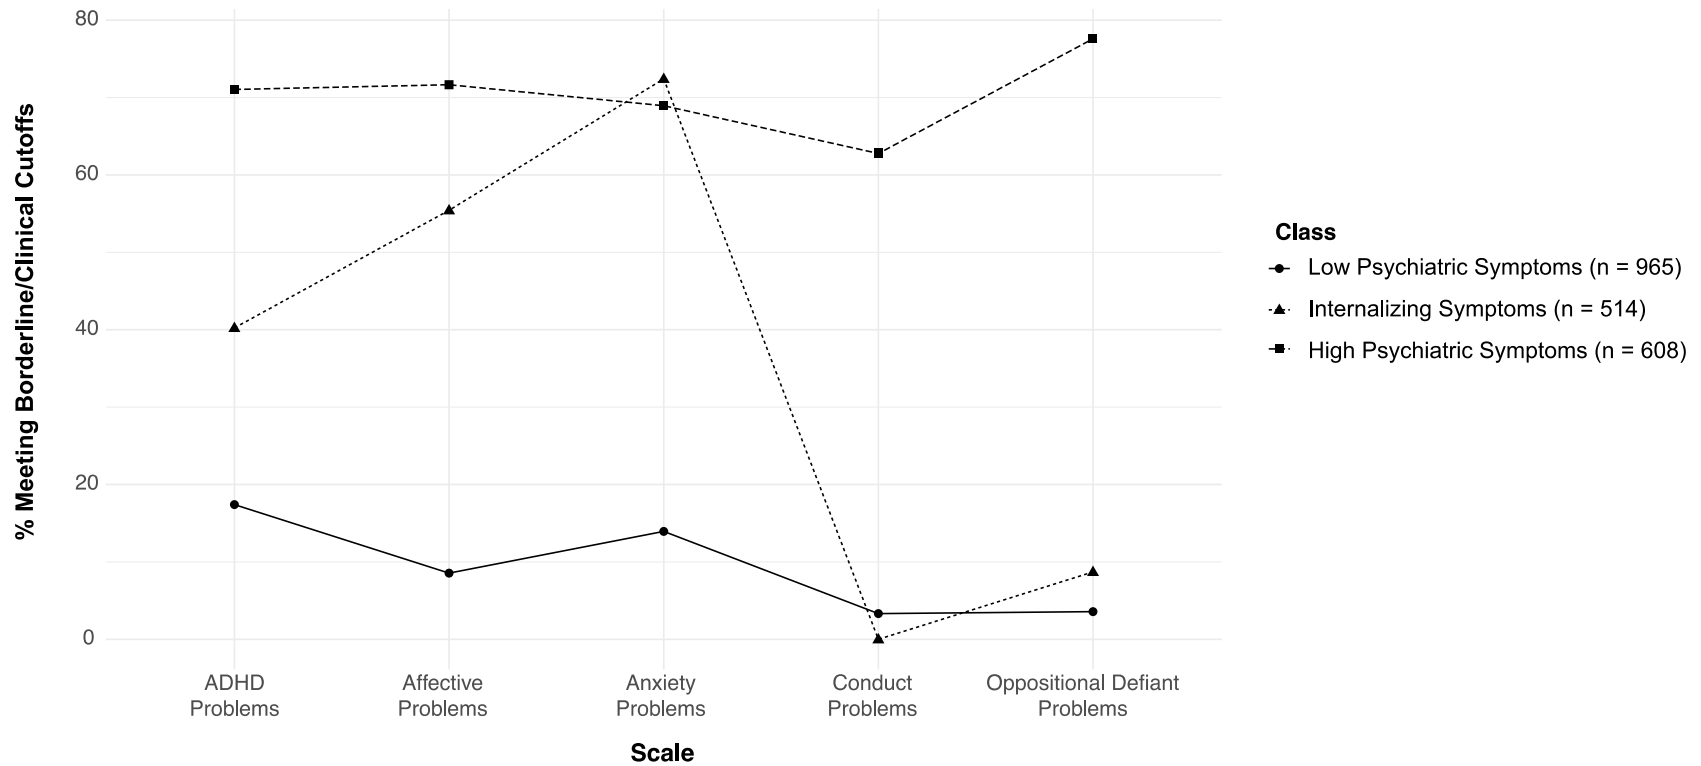

*Note.* Latent class analysis was conducted with five *DSM*-Oriented Scales of the Child Behavior Checklist for Ages 6 to 18 (Anxiety Problems, Affective Problems, Attention Deficit/Hyperactivity Problems, Conduct Problems, and Oppositional Defiant Problems) as indicator variables. Age and sex were used as covariates.

**Supplementary Table 5**

*Percent of participants whose caregiver(s) endorsed a history of each medical condition grouped into one of three larger categories:*

*Allergies/Autoimmune Conditions.*

---

| Subgroup               | Asthma | Bowel Disorders | Hypothyroidism | Other Autoimmune Condition | Psoriasis | Environment Allergies | Food Allergies | Medication Allergies |
|------------------------|--------|-----------------|----------------|----------------------------|-----------|-----------------------|----------------|----------------------|
| Externalizing Symptoms | 6.20   | 4.26            | 0.39           | 1.55                       | 2.33      | 24.81                 | 15.12          | 11.63                |
| Internalizing Symptoms | 11.68  | 1.82            | 0.15           | 0.91                       | 1.37      | 28.98                 | 12.75          | 16.54                |
| High Symptoms          | 12.10  | 3.18            | 1.27           | 1.59                       | 0.32      | 29.94                 | 15.29          | 16.56                |

---

*Note. Only allergies/autoimmune conditions with endorsement rates  $\geq 1\%$  are shown.*

**Supplementary Table 6**

*Percent of participants whose caregiver(s) endorsed a history of each medical condition grouped into one of three larger categories:*

*Gastrointestinal Conditions.*

---

| Subgroup               | Bloating | Constipation | Diarrhea | Excessive Gas | Gastroesophageal Reflux | Irritable Bowel syndrome | Other Gastrointestinal Condition (1) | Unusual Stools | Vomiting |
|------------------------|----------|--------------|----------|---------------|-------------------------|--------------------------|--------------------------------------|----------------|----------|
| Externalizing Symptoms | 2.58     | 19.77        | 5.43     | 2.33          | 5.04                    | 1.16                     | 3.49                                 | 8.14           | 3.49     |
| Internalizing Symptoms | 2.58     | 21.24        | 7.74     | 3.49          | 7.44                    | 0.46                     | 2.28                                 | 5.31           | 4.10     |
| High Symptoms          | 3.18     | 19.75        | 9.24     | 5.41          | 9.24                    | 0.32                     | 2.23                                 | 5.10           | 4.78     |

---

*Note. Only gastrointestinal conditions with endorsement rates  $\geq 1\%$  are shown.*

**Supplementary Table 7**

*Percent of participants whose caregiver(s) endorsed a history of each medical condition grouped into one of three larger categories: Neurological Conditions.*

---

| Subgroup               | EEG Done | Excessively Clumsy/Uncoordinated | Meningitis | Movement Abnormalities | MRI/CT Done | Positive Lead Screening | Tourette's/Tics | Febrile Seizures | Seizures Other |
|------------------------|----------|----------------------------------|------------|------------------------|-------------|-------------------------|-----------------|------------------|----------------|
| Externalizing Symptoms | 3.10     | 8.53                             | 1.16       | 2.33                   | 2.71        | 0.39                    | 3.10            | 3.49             | 5.04           |
| Internalizing Symptoms | 4.55     | 10.17                            | 0.15       | 1.97                   | 1.82        | 1.37                    | 12.75           | 3.95             | 6.83           |
| High Symptoms          | 3.50     | 11.46                            | 0.32       | 0.64                   | 1.59        | 1.27                    | 15.29           | 3.82             | 5.10           |

---

*Note. Only neurological conditions with endorsement rates  $\geq 1\%$  are shown.*

**Supplementary Table 8**

*Manually-recoded sleep duration (sleep\_duration\_curr\_clean) variable from the Simons Simplex Collection.*

| child_regularity_duration_hours_curr | sleep_duration_curr_clean |
|--------------------------------------|---------------------------|
| 7.5                                  | 7.5                       |
| 9                                    | 9                         |
| 10                                   | 10                        |
| 9                                    | 9                         |
| 9                                    | 9                         |
| 10                                   | 10                        |
| About 9 hours                        | 9                         |
| 10                                   | 10                        |
| 9                                    | 9                         |
| 10                                   | 10                        |
| 9                                    | 9                         |
|                                      |                           |
| 9                                    | 9                         |
| 12                                   | 12                        |
| 10                                   | 10                        |
| 8                                    | 8                         |
| 7                                    | 7                         |
| 8                                    | 8                         |
| 12-Nov                               | 11.5                      |
| 11-Oct                               | 10.5                      |
| 8.5                                  | 8.5                       |
| 9                                    | 9                         |
| About 10 hours                       | 10                        |
| 10                                   | 10                        |

|                         |      |
|-------------------------|------|
| 11                      | 11   |
| 6                       | 6    |
| 10.5                    | 10.5 |
| 8                       | 8    |
| 9                       | 9    |
| 8-9 hours               | 8.5  |
| 11                      | 11   |
| 11                      | 11   |
| 10                      | 10   |
| 10-Jul                  | 8.5  |
| 10-Sep                  | 9.5  |
| 7.5                     | 7.5  |
| 12-Nov                  | 11.5 |
| 9-Aug                   | 8.5  |
| 11                      | 11   |
| 9.5 hrs during the week | 9.5  |
| 8                       | 8    |
| 11                      | 11   |
| 9                       | 9    |
| 8                       | 8    |
| 9                       | 9    |
| 9                       | 9    |
| 10                      | 10   |
| 8                       | 8    |
| 10                      | 10   |
| 10 hours                | 10   |
| 10                      | 10   |
| 10                      | 10   |

|             |      |
|-------------|------|
| 10          | 10   |
| 9           | 9    |
| 8 1/2 hours | 8.5  |
| 9           | 9    |
| 8-Jul       | 7.5  |
| 10-Sep      | 9.5  |
| 11          | 11   |
| 10          | 10   |
| 8 hours     | 8    |
| 8           | 8    |
| 8-Jul       | 7.5  |
| 8           | 8    |
| 11          | 11   |
| 10.5        | 10.5 |
| 10          | 10   |
| 10.5        | 10.5 |
| 8.5         | 8.5  |
| 10          | 10   |
| 11          | 11   |
| 9 hours     | 9    |
| 7           | 7    |
| 9           | 9    |
| 9           | 9    |
| 10hrs       | 10   |
| 9           | 9    |
| 11          | 11   |
| 10          | 10   |
| 9           | 9    |



|            |      |
|------------|------|
| 10         | 10   |
| 11-Oct     | 10.5 |
| 9          | 9    |
| 5          | 5    |
| 10         | 10   |
| 9.5        | 9.5  |
| 8          | 8    |
| 8 hours    | 8    |
| 7.5 hrs    | 7.5  |
| 8          | 8    |
| 8          | 8    |
| 9          | 9    |
| 9.5        | 9.5  |
| ~7         | 7    |
| 10-Sep     | 9.5  |
| 10         | 10   |
| 8-10 hrs   | 9    |
| 10 hours   | 10   |
| 9          | 9    |
| 10         | 10   |
| 10         | 10   |
| 10.5 hours | 10.5 |
| 11         | 11   |
| 8          | 8    |
| 8          | 8    |
| 11         | 11   |
| 10         | 10   |
| 7          | 7    |

|             |      |
|-------------|------|
| 8-9.5       | 8.75 |
| 9           | 9    |
| 6           | 6    |
| 10          | 10   |
| 9           | 9    |
| 10          | 10   |
| 8.5         | 8.5  |
| 9           | 9    |
| 7           | 7    |
| 7.5-9 hours | 8.25 |
| 10          | 10   |
| 10          | 10   |
| 9 hours     | 9    |
| 9-Aug       | 8.5  |
| 9-10 hrs    | 9.5  |
| 8           | 8    |
| 10-Sep      | 9.5  |
| 10-Sep      | 9.5  |
| 9.5         | 9.5  |
| 10          | 10   |
| 9-Aug       | 8.5  |
| 8           | 8    |
| 8           | 8    |
| 9           | 9    |
| 10          | 10   |
| 10          | 10   |
| 9           | 9    |
| 10          | 10   |

|        |      |
|--------|------|
| 9      | 9    |
| 8      | 8    |
| 8      | 8    |
| 9.5    | 9.5  |
| 10     | 10   |
| 9      | 9    |
| 8      | 8    |
| 9      | 9    |
|        |      |
|        |      |
| 9      | 9    |
| 9      | 9    |
| 9.5    | 9.5  |
| 10     | 10   |
| 10     | 10   |
| 8-Jul  | 7.5  |
| 8      | 8    |
| 7-Jun  | 6.5  |
| 8      | 8    |
| 8 hrs  | 8    |
| 9.75   | 9.75 |
| 10     | 10   |
| 10     | 10   |
| 10-Aug | 9    |
| 9      | 9    |
| 9      | 9    |
| 9.5    | 9.5  |
| 8.5    | 8.5  |

|               |      |
|---------------|------|
| 9-10 hours    | 9.5  |
| 9             | 9    |
| 9             | 9    |
| 9             | 9    |
| 8-Jul         | 7.5  |
| 10            | 10   |
| 11            | 11   |
| 10-Aug        | 9    |
| 9             | 9    |
| 7 hrs         | 7    |
| 10            | 10   |
| 9             | 9    |
| about 8 hours | 8    |
| 9             | 9    |
| 10            | 10   |
| 9             | 9    |
| 9 hours       | 9    |
| 11-Oct        | 10.5 |
| 10            | 10   |
|               |      |
|               |      |
| 10-11 hours   | 10.5 |
| 10            | 10   |
| 10            | 10   |
| 9 hours       | 9    |
| 11            | 11   |
| 10            | 10   |
| 9 hrs         | 9    |

|             |      |
|-------------|------|
| 9.5         | 9.5  |
| 8           | 8    |
| 8.5         | 8.5  |
| 10          | 10   |
| 9           | 9    |
| 11          | 11   |
| 9           | 9    |
| 8.5         | 8.5  |
| 8           | 8    |
| 9.5         | 9.5  |
| 9           | 9    |
| 9           | 9    |
| 10.5        | 10.5 |
| 7           | 7    |
| 10          | 10   |
| 8           | 8    |
| 9           | 9    |
| 9           | 9    |
| 9.5         | 9.5  |
| 9           | 9    |
| 9 hours     | 9    |
| 9.5         | 9.5  |
| 7.5-8 hours | 7.75 |
| 11-Oct      | 10.5 |
| 10          | 10   |
| 8           | 8    |
| 10          | 10   |
| 9           | 9    |

|            |      |
|------------|------|
| 8          | 8    |
| don't know |      |
| 8          | 8    |
| 8.5 hrs    | 8.5  |
| 10         | 10   |
| 10         | 10   |
| 8-9 hours  | 8.5  |
| 5-Apr      | 4.5  |
| 10         | 10   |
| 9          | 9    |
| 12-Nov     | 11.5 |
| 10         | 10   |
| 9.5        | 9.5  |
| 10         | 10   |
| 9          | 9    |
| 10         | 10   |
| 10         | 10   |
| 10 hrs     | 10   |
| 9          | 9    |
| 9-10 hrs   | 9.5  |
| 8-9 hours  | 8.5  |
| 8.5        | 8.5  |
| 8-Jul      | 7.5  |
| 10         | 10   |
| 9          | 9    |
| 10         | 10   |
| 9.5        | 9.5  |
| 8          | 8    |

|          |      |
|----------|------|
| 9        | 9    |
| 9-Aug    | 8.5  |
| 9        | 9    |
| 10 hrs   | 10   |
| 10-Sep   | 9.5  |
| 10-Sep   | 9.5  |
| 10 hours | 10   |
| 8 hours  | 8    |
| 10       | 10   |
| 11       | 11   |
| 9.5      | 9.5  |
| 9        | 9    |
| 9        | 9    |
| 8.5      | 8.5  |
| 10       | 10   |
| 9.5      | 9.5  |
| 11       | 11   |
| 9.5      | 9.5  |
| 8        | 8    |
| 10       | 10   |
| 11       | 11   |
| 10       | 10   |
| 11-Oct   | 10.5 |
| 9        | 9    |
| 9.5      | 9.5  |
| 9        | 9    |
| 10       | 10   |
| 8 hours  | 8    |

|          |      |
|----------|------|
| 8        | 8    |
| 9        | 9    |
| 11 hours | 11   |
| 10.5     | 10.5 |
| 10       | 10   |
| 9        | 9    |
| 8        | 8    |
| 9        | 9    |
| 10 hours | 10   |
| 11-Oct   | 10.5 |
| 10       | 10   |
| 8        | 8    |
| 10-Sep   | 9.5  |
| 10.5     | 10.5 |
| 10       | 10   |
| 10       | 10   |
| 8        | 8    |
| 11       | 11   |
| 10       | 10   |
| 10       | 10   |
| 10.5     | 10.5 |
| 8        | 8    |
| 10       | 10   |
| 9 hours  | 9    |
| 11 hours | 11   |
| 10       | 10   |
| 8        | 8    |
| 8        | 8    |



|            |      |
|------------|------|
| 9 hours    | 9    |
| 8          | 8    |
| 9          | 9    |
| 9          | 9    |
| 10.5 hours | 10.5 |
| 10         | 10   |
| 8.5        | 8.5  |
| 10         | 10   |
| 7          | 7    |
| 11-Oct     | 10.5 |
| 10 hours   | 10   |
| 10         | 10   |
| 11         | 11   |
| 7-Jun      | 6.5  |
| 11.5       | 11.5 |
| 9          | 9    |
| 9          | 9    |
|            |      |
| 10.5       | 10.5 |
| 11 hrs     | 11   |
| 13         | 13   |
| 10         | 10   |
| 4          | 4    |
| 8.5        | 8.5  |
| 10         | 10   |
| 10 hours   | 10   |
| 7.5        | 7.5  |
| 10         | 10   |

|         |      |
|---------|------|
| 8 hours | 8    |
| 9.5     | 9.5  |
| 10      | 10   |
| 8hrs    | 8    |
| 10.5    | 10.5 |
| 9       | 9    |
| 10-Sep  | 9.5  |
| 8       | 8    |
| 7       | 7    |
| 10      | 10   |
| 8       | 8    |
| 9       | 9    |
| 7.5     | 7.5  |
| 8       | 8    |
| 8-Jul   | 7.5  |
| 10      | 10   |
| 11-Oct  | 10.5 |
| 10.5    | 10.5 |
| 10      | 10   |
| 9-Aug   | 8.5  |
| 9.5     | 9.5  |
| 10      | 10   |
| 10 hrs  | 10   |
| 9       | 9    |
| 8 hours | 8    |
| 7.5     | 7.5  |
| 9       | 9    |
| 8       | 8    |

|                |      |
|----------------|------|
| 11             | 11   |
| 8              | 8    |
| 10             | 10   |
| 9 1/2-10 hours | 9.75 |
| 10             | 10   |
| 8 hrs          | 8    |
| 9              | 9    |
| 12-Oct         | 11   |
| 11             | 11   |
| 9.5            | 9.5  |
| 10             | 10   |
| 10             | 10   |
| 8              | 8    |
| 11             | 11   |
| 7.5            | 7.5  |
| 7              | 7    |
| 11             | 11   |
| 9              | 9    |
| 9              | 9    |
| 8              | 8    |
| 9              | 9    |
| 8              | 8    |
| 8.5hrs         | 8.5  |
| 6-Sep          | 7.5  |
|                |      |
| 8.5            | 8.5  |
| 10-Aug         | 9    |
| 10             | 10   |

|           |      |
|-----------|------|
| 6         | 6    |
| 8.5       | 8.5  |
| 10        | 10   |
| 10        | 10   |
| 7 hours   | 7    |
| 10        | 10   |
| 9         | 9    |
| 10        | 10   |
| 6         | 6    |
| 9         | 9    |
| 7         | 7    |
| 9-Aug     | 8.5  |
| 7.5       | 7.5  |
| 8-9 hours | 8.5  |
| 11 hours  | 11   |
| 8         | 8    |
| 7         | 7    |
| 9         | 9    |
| 6.5 HRS   | 6.5  |
| 9         | 9    |
| 9 hrs     | 9    |
| 9         | 9    |
| 9 hrs     | 9    |
| 10        | 10   |
| 10-12 hrs | 11   |
| 10        | 10   |
| 10.5      | 10.5 |
| 9         | 9    |

|         |      |
|---------|------|
| 8       | 8    |
| 5.5     | 5.5  |
| 11-Sep  | 10   |
| 11      | 11   |
| 10      | 10   |
| 10-Sep  | 9.5  |
| 10.5    | 10.5 |
| 9       | 9    |
| 9       | 9    |
| 8 hrs   | 8    |
| 10      | 10   |
| 9       | 9    |
| 8       | 8    |
| normal  |      |
| 8 hours | 8    |
| 10      | 10   |
| 7       | 7    |
| 9-Aug   | 8.5  |
| 9.5     | 9.5  |
| 10      | 10   |
| 9       | 9    |
| 8       | 8    |
| 7       | 7    |
| 8.5     | 8.5  |
| 12      | 12   |
| 8       | 8    |
| 10.5    | 10.5 |
| 9       | 9    |

|        |      |
|--------|------|
| 8      | 8    |
| 10     | 10   |
| 6      | 6    |
| 10     | 10   |
| 9      | 9    |
| 8.5    | 8.5  |
| 10-Aug | 9    |
| 7      | 7    |
| 9      | 9    |
| 11     | 11   |
| 10     | 10   |
| 9      | 9    |
| 11-Oct | 10.5 |
| 10     | 10   |
| 6.5    | 6.5  |
| 8      | 8    |
| 8.5    | 8.5  |
| 9      | 9    |
| 8      | 8    |
| 9      | 9    |
| 10     | 10   |
| 7.5    | 7.5  |
| 10     | 10   |
| 12     | 12   |
| 8      | 8    |
| 6      | 6    |
| 7      | 7    |
| 11     | 11   |

|        |      |
|--------|------|
| 9      | 9    |
| 10     | 10   |
| 9      | 9    |
| 9      | 9    |
| 9      | 9    |
| 10.5   | 10.5 |
| 8      | 8    |
| 8      | 8    |
| 10     | 10   |
| 10     | 10   |
| 9      | 9    |
| 10.5   | 10.5 |
| 10     | 10   |
| 7      | 7    |
| 10     | 10   |
| 7.5    | 7.5  |
| 8      | 8    |
| 10     | 10   |
| 9      | 9    |
| 10-Sep | 9.5  |
| 10     | 10   |
| 10     | 10   |
| 9      | 9    |
| 8      | 8    |
| 10     | 10   |
| 10     | 10   |
| 12     | 12   |
| 10-Sep | 9.5  |

|        |     |
|--------|-----|
| 12     | 12  |
| 9      | 9   |
| 9      | 9   |
| 8      | 8   |
| 8      | 8   |
| 12     | 12  |
| 10     | 10  |
| 9      | 9   |
| 11     | 11  |
| 9      | 9   |
| 10     | 10  |
| 10     | 10  |
| 8      | 8   |
| 8      | 8   |
| 8      | 8   |
| 10     | 10  |
| 8      | 8   |
| 9      | 9   |
| 7.5    | 7.5 |
| 8-Jul  | 7.5 |
| 12     | 12  |
| 12-Oct | 11  |
| 9      | 9   |
| 9      | 9   |
| 9.5    | 9.5 |
| 8      | 8   |
| 9      | 9   |
| 9      | 9   |



|       |      |
|-------|------|
| 10    | 10   |
| 10    | 10   |
| 10.5  | 10.5 |
| 8     | 8    |
| 9.5   | 9.5  |
| 8     | 8    |
| 9.5   | 9.5  |
| 9     | 9    |
| 6     | 6    |
| 8     | 8    |
| 10    | 10   |
| 8     | 8    |
| 8 hrs | 8    |
| 10    | 10   |
| 8     | 8    |
| 11    | 11   |
| 8     | 8    |
| 8     | 8    |
| 10.5  | 10.5 |
| 9     | 9    |
| 10    | 10   |
| 8     | 8    |
| 10    | 10   |
| 10    | 10   |
| 9     | 9    |
| 7     | 7    |
|       |      |
| 8-Jul | 7.5  |

|       |      |
|-------|------|
| 10    | 10   |
| 8     | 8    |
| 10    | 10   |
| 11.5  | 11.5 |
| 10    | 10   |
| 11    | 11   |
| 9     | 9    |
| 9.5   | 9.5  |
| 11    | 11   |
| 8     | 8    |
| 10    | 10   |
| 7     | 7    |
| 7     | 7    |
| 9     | 9    |
| 9 hrs | 9    |
| 8     | 8    |
| 10    | 10   |
| 9.5   | 9.5  |
| 11    | 11   |
| 9.5   | 9.5  |
| 9 hrs | 9    |
| 9     | 9    |
| 11    | 11   |
| 10    | 10   |
| 5     | 5    |
| 8     | 8    |
| 10    | 10   |
| 9     | 9    |

|        |       |
|--------|-------|
| 10.5   | 10.5  |
| 9      | 9     |
| 10     | 10    |
| 10     | 10    |
| 9-Aug  | 8.5   |
| 11     | 11    |
| 9.5    | 9.5   |
| 6      | 6     |
| 10-Jan | 5.5   |
| 10     | 10    |
| 9.5    | 9.5   |
| 11     | 11    |
| 9      | 9     |
| 9.5    | 9.5   |
| 10     | 10    |
| 10     | 10    |
| 9      | 9     |
| 8      | 8     |
| 11     | 11    |
| 9      | 9     |
| 9      | 9     |
| 10     | 10    |
| 8      | 8     |
| 10     | 10    |
| 9.5    | 9.5   |
| 9      | 9     |
| 10.25  | 10.25 |
| 9      | 9     |

|        |      |
|--------|------|
| 9.5    | 9.5  |
| 9      | 9    |
| 10     | 10   |
| 10     | 10   |
| 9      | 9    |
| 8      | 8    |
| 9      | 9    |
| 8      | 8    |
| 6      | 6    |
| 9      | 9    |
| 10     | 10   |
| 11     | 11   |
| 9.5    | 9.5  |
| 10     | 10   |
| 8      | 8    |
| 9      | 9    |
| 10     | 10   |
| 12-Oct | 11   |
| 9      | 9    |
| 9      | 9    |
| 8      | 8    |
| 10     | 10   |
| 10.5   | 10.5 |
| 10.5   | 10.5 |
| 9      | 9    |
| 8.5    | 8.5  |
| 9      | 9    |
| 8      | 8    |

|       |      |
|-------|------|
| 10    | 10   |
| 10.5  | 10.5 |
| 11    | 11   |
| 8     | 8    |
| 10    | 10   |
| 8     | 8    |
| 9     | 9    |
| 10    | 10   |
| 8     | 8    |
| 9.5   | 9.5  |
| 9     | 9    |
| 9     | 9    |
| 9     | 9    |
| 10    | 10   |
| 10    | 10   |
| 8     | 8    |
| 11    | 11   |
| 9.5   | 9.5  |
| 9     | 9    |
| 8     | 8    |
| 9     | 9    |
| 9     | 9    |
| 9     | 9    |
| 10    | 10   |
| 10    | 10   |
| 9.5   | 9.5  |
| 10    | 10   |
| 9-Aug | 8.5  |

|      |      |
|------|------|
| 7    | 7    |
| 10   | 10   |
| 9    | 9    |
| 10   | 10   |
| 10   | 10   |
| 9    | 9    |
| 9.5  | 9.5  |
| 6    | 6    |
| 10.5 | 10.5 |
| 8.5  | 8.5  |
| 8.5  | 8.5  |
| 10   | 10   |
| 9    | 9    |
| 11   | 11   |
| 10   | 10   |
| 7    | 7    |
| 8hrs | 8    |
| 10   | 10   |
| 11   | 11   |
| 10   | 10   |
| 10   | 10   |
| 9    | 9    |
| 10   | 10   |
| 10   | 10   |
| 7.5  | 7.5  |
| 9    | 9    |
| 9    | 9    |
| 10   | 10   |

|      |      |
|------|------|
| 11   | 11   |
| 7.5  | 7.5  |
| 9.5  | 9.5  |
| 5    | 5    |
| 9    | 9    |
| 9.5  | 9.5  |
| 10.5 | 10.5 |
| 9    | 9    |
| 10.5 | 10.5 |
| 10   | 10   |
| 9    | 9    |
| 10   | 10   |
| 10.5 | 10.5 |
| 8    | 8    |
| 10.5 | 10.5 |
| 9    | 9    |
| 10   | 10   |
| 10   | 10   |
| 9    | 9    |
| 12   | 12   |
| 10.5 | 10.5 |
| 10   | 10   |
| 11   | 11   |
| 11   | 11   |
| 8    | 8    |
| 8    | 8    |
| 8    | 8    |
| 6    | 6    |

|      |      |
|------|------|
| 8    | 8    |
| 7.5  | 7.5  |
| 9    | 9    |
| 9.5  | 9.5  |
| 10   | 10   |
| 10   | 10   |
| 10   | 10   |
| 8    | 8    |
| 8    | 8    |
| 12   | 12   |
| 11   | 11   |
| 10.5 | 10.5 |
| 8.5  | 8.5  |
| 9    | 9    |
| 11   | 11   |
| 7    | 7    |
| 10   | 10   |
| 8    | 8    |
| 10   | 10   |
| 10.5 | 10.5 |
| 10.5 | 10.5 |
| 8    | 8    |
| 10   | 10   |
| 10.5 | 10.5 |
| 8    | 8    |
| 9.5  | 9.5  |
| 9.5  | 9.5  |
| 8    | 8    |



|      |      |
|------|------|
| 10   | 10   |
| 11   | 11   |
| 9.5  | 9.5  |
| 9.5  | 9.5  |
| 10   | 10   |
| 11   | 11   |
| 10   | 10   |
| 9    | 9    |
| 10   | 10   |
| 7    | 7    |
| 8    | 8    |
| 10.5 | 10.5 |
| 8    | 8    |
| 8    | 8    |
| 8.5  | 8.5  |
| 9    | 9    |
| 9    | 9    |
| 12   | 12   |
| 9    | 9    |
| 9.5  | 9.5  |
| 8    | 8    |
| 6    | 6    |
| 10.5 | 10.5 |
| 10   | 10   |
| 9.5  | 9.5  |
| 9.5  | 9.5  |
| 10   | 10   |
| 9.5  | 9.5  |

|      |      |
|------|------|
| 8.5  | 8.5  |
| 9    | 9    |
| 12   | 12   |
| 11.5 | 11.5 |
| 10.5 | 10.5 |
| 10   | 10   |
| 9    | 9    |
| 10   | 10   |
| 10   | 10   |
| 11   | 11   |
| 7.5  | 7.5  |
| 9    | 9    |
| 9    | 9    |
| 9    | 9    |
| 10   | 10   |
| 11   | 11   |
| 11   | 11   |
| 9    | 9    |
| 11   | 11   |
| 8    | 8    |
| 10   | 10   |
| 10   | 10   |
| 8.5  | 8.5  |
| 9    | 9    |
| 10   | 10   |
| 8.5  | 8.5  |
| 9    | 9    |
| 11   | 11   |

|      |      |
|------|------|
| 11   | 11   |
| 9    | 9    |
| 10.5 | 10.5 |
| 10   | 10   |
| 9    | 9    |
| 11   | 11   |
| 6.5  | 6.5  |
| 8    | 8    |
| 6    | 6    |
| 8    | 8    |
| 9    | 9    |
| 10.5 | 10.5 |
| 10.5 | 10.5 |
| 9    | 9    |
| 8    | 8    |
| 10   | 10   |
| 8    | 8    |
| 11   | 11   |
| 10   | 10   |
| 10   | 10   |
| 8.5  | 8.5  |
| 8    | 8    |
| 10   | 10   |
| 10   | 10   |
| 11   | 11   |
| 9    | 9    |
| 10   | 10   |
| 9.75 | 9.75 |

|      |      |
|------|------|
| 10   | 10   |
| 8    | 8    |
| 10   | 10   |
| 10   | 10   |
| 8    | 8    |
| 10   | 10   |
| 9    | 9    |
| 8    | 8    |
| 10   | 10   |
| 8    | 8    |
| 10   | 10   |
| 8    | 8    |
| 10   | 10   |
| 12   | 12   |
| 8.5  | 8.5  |
| 9    | 9    |
| 7    | 7    |
| 9    | 9    |
| 9    | 9    |
| 8.5  | 8.5  |
| 9.5  | 9.5  |
| 9    | 9    |
| 9    | 9    |
| 10.5 | 10.5 |
| 9    | 9    |
| 9    | 9    |
| 9.5  | 9.5  |
| 10.5 | 10.5 |

|      |      |
|------|------|
| 9    | 9    |
| 10   | 10   |
| 10   | 10   |
| 9.5  | 9.5  |
| 6    | 6    |
| 10   | 10   |
| 9    | 9    |
| 8    | 8    |
| 7.5  | 7.5  |
| 11   | 11   |
| 11   | 11   |
| 10   | 10   |
| 8    | 8    |
| 9    | 9    |
| 8    | 8    |
| 10.5 | 10.5 |
| 8    | 8    |
| 10   | 10   |
| 8    | 8    |
| 11.5 | 11.5 |
| 9    | 9    |
| 8.5  | 8.5  |
| 10   | 10   |
| 10   | 10   |
| 10.5 | 10.5 |
| 9.5  | 9.5  |
| 10   | 10   |
| 9    | 9    |

|      |      |
|------|------|
| 11   | 11   |
| 10   | 10   |
| 8    | 8    |
| 10   | 10   |
| 8    | 8    |
| 10   | 10   |
| 8    | 8    |
| 10.5 | 10.5 |
| 9    | 9    |
| 8.5  | 8.5  |
| 8    | 8    |
| 10   | 10   |
| 8    | 8    |
| 10   | 10   |
| 9    | 9    |
| 11.5 | 11.5 |
| 9    | 9    |
| 9    | 9    |
| 9    | 9    |
| 10   | 10   |
| 9    | 9    |
| 9    | 9    |
| 12   | 12   |
| 8.5  | 8.5  |
| 9    | 9    |
| 9    | 9    |
| 9    | 9    |
| 10   | 10   |

|      |      |
|------|------|
| 8    | 8    |
| 9    | 9    |
| 10   | 10   |
| 11   | 11   |
| 8    | 8    |
| 7    | 7    |
| 10.5 | 10.5 |
| 10   | 10   |
| 9    | 9    |
| 10   | 10   |
| 9.5  | 9.5  |
| 10   | 10   |
| 6.5  | 6.5  |
| 8    | 8    |
| 9    | 9    |
| 11   | 11   |
| 7.5  | 7.5  |
| 8    | 8    |
| 7.5  | 7.5  |
| 10   | 10   |
| 10   | 10   |
| 10   | 10   |
| 9.5  | 9.5  |
| 11   | 11   |
| 8    | 8    |
| 9.5  | 9.5  |
| 9    | 9    |
| 9.5  | 9.5  |

|     |     |
|-----|-----|
| 11  | 11  |
| 10  | 10  |
| 8   | 8   |
| 8   | 8   |
| 7   | 7   |
| 11  | 11  |
| 10  | 10  |
| 9   | 9   |
| 9.5 | 9.5 |
| 10  | 10  |
| 8   | 8   |
| 8   | 8   |
| 5.5 | 5.5 |
| 10  | 10  |
| 10  | 10  |
| 7   | 7   |
| 9   | 9   |
| 8.5 | 8.5 |
| 9   | 9   |
| 10  | 10  |
| 7   | 7   |
| 9.5 | 9.5 |
| 6.5 | 6.5 |
| 10  | 10  |
| 8.5 | 8.5 |
| 8.5 | 8.5 |
| 8   | 8   |
|     |     |



|     |     |
|-----|-----|
| 8.5 | 8.5 |
| 9   | 9   |
| 9   | 9   |
| 7.5 | 7.5 |
| 11  | 11  |
| 9   | 9   |
| 11  | 11  |
| 11  | 11  |
| 9.5 | 9.5 |
| 9   | 9   |
| 8   | 8   |
| 9   | 9   |
| 10  | 10  |
| 7.5 | 7.5 |
| 8   | 8   |
| 10  | 10  |
| 9   | 9   |
| 6   | 6   |
| 9   | 9   |
| 11  | 11  |
| 9.5 | 9.5 |
| 7   | 7   |
| 9.5 | 9.5 |
| 9   | 9   |
| 8   | 8   |
| 8.5 | 8.5 |
| 8.5 | 8.5 |
| 8.5 | 8.5 |

|      |      |
|------|------|
| 9    | 9    |
| 10   | 10   |
| 4.5  | 4.5  |
| 8    | 8    |
| 10   | 10   |
| 11   | 11   |
| 9    | 9    |
| 9.5  | 9.5  |
| 8    | 8    |
| 10   | 10   |
| 8    | 8    |
| 10   | 10   |
| 9    | 9    |
| 8    | 8    |
| 8    | 8    |
| 10   | 10   |
| 9    | 9    |
| 7.5  | 7.5  |
| 10   | 10   |
| 8    | 8    |
| 9    | 9    |
| 10.5 | 10.5 |
| 8    | 8    |
| 11   | 11   |
| 10   | 10   |
| 10   | 10   |
| 9    | 9    |
| 10   | 10   |

|     |     |
|-----|-----|
| 8.5 | 8.5 |
| 11  | 11  |
| 9   | 9   |
| 8   | 8   |
| 9   | 9   |
| 9   | 9   |
| 8   | 8   |
| 10  | 10  |
| 8   | 8   |
| 9   | 9   |
| 10  | 10  |
| 11  | 11  |
| 10  | 10  |
| 9.5 | 9.5 |
| 9.5 | 9.5 |
| 11  | 11  |
| 9.5 | 9.5 |
| 10  | 10  |
| 8   | 8   |
| 12  | 12  |
| 10  | 10  |
| 7   | 7   |
| 8   | 8   |
| 9.5 | 9.5 |
| 11  | 11  |
| 6.5 | 6.5 |
| 10  | 10  |
| 9   | 9   |

|      |      |
|------|------|
| 11   | 11   |
| 8    | 8    |
| 9    | 9    |
| 9    | 9    |
| 7    | 7    |
| 10   | 10   |
| 9.5  | 9.5  |
| 8    | 8    |
| 10.5 | 10.5 |
| 10.5 | 10.5 |
| 10.5 | 10.5 |
| 8    | 8    |
| 7.5  | 7.5  |
| 9    | 9    |
| 8.5  | 8.5  |
| 10   | 10   |
| 11   | 11   |
| 12   | 12   |
| 9    | 9    |
| 10   | 10   |
| 9    | 9    |
| 10   | 10   |
| 10   | 10   |
| 9    | 9    |
| 8.5  | 8.5  |
| 10   | 10   |
| 10   | 10   |
| 10   | 10   |

|     |     |
|-----|-----|
| 10  | 10  |
| 7   | 7   |
| 9   | 9   |
| 10  | 10  |
| 10  | 10  |
| 9   | 9   |
| 9   | 9   |
| 8   | 8   |
| 9   | 9   |
| 9.5 | 9.5 |
| 10  | 10  |
| 9   | 9   |
| 6   | 6   |
| 10  | 10  |
| 10  | 10  |
| 10  | 10  |
| 6   | 6   |
| 10  | 10  |
| 10  | 10  |
| 10  | 10  |
| 10  | 10  |
|     |     |
| 9   | 9   |
| 9   | 9   |
| 10  | 10  |
| 10  | 10  |
| 9   | 9   |
| 7   | 7   |

|      |      |
|------|------|
| 10   | 10   |
| 6    | 6    |
| 9.5  | 9.5  |
| 9    | 9    |
| 8    | 8    |
| 6    | 6    |
| 11.5 | 11.5 |
| 10   | 10   |
| 10   | 10   |
| 9    | 9    |
| 9.75 | 9.75 |
| 12   | 12   |
| 8    | 8    |
| 10.5 | 10.5 |
| 9    | 9    |
| 11.5 | 11.5 |
| 9    | 9    |
| 10   | 10   |
| 10   | 10   |
| 9    | 9    |
| 10.5 | 10.5 |
| 9    | 9    |
| 9    | 9    |
| 8    | 8    |
| 10   | 10   |
| 10   | 10   |
| 10   | 10   |
| 10   | 10   |

|      |      |
|------|------|
| 9    | 9    |
| 9    | 9    |
| 8    | 8    |
| 10   | 10   |
| 10.5 | 10.5 |
| 9    | 9    |
| 9    | 9    |
| 11   | 11   |
| 11   | 11   |
| 11   | 11   |
| 11   | 11   |
| 9    | 9    |
| 10   | 10   |
| 10   | 10   |
| 10   | 10   |
| 10   | 10   |
| 9.5  | 9.5  |
| 7    | 7    |
| 10   | 10   |
| 10   | 10   |
| 10.5 | 10.5 |
| 10.5 | 10.5 |
| 10   | 10   |
| 10.5 | 10.5 |
| 9.5  | 9.5  |
| 9    | 9    |
| 7.5  | 7.5  |
| 11.5 | 11.5 |

|      |      |
|------|------|
| 6.5  | 6.5  |
| 9.5  | 9.5  |
| 9.5  | 9.5  |
| 9    | 9    |
| 10.5 | 10.5 |
| 10   | 10   |
| 8    | 8    |
| 9.5  | 9.5  |
| 9.5  | 9.5  |
| 9    | 9    |
| 10   | 10   |
| 10   | 10   |
| 8.5  | 8.5  |
| 10   | 10   |
| 7    | 7    |
| 8    | 8    |
| 10   | 10   |
| 10   | 10   |
| 9    | 9    |
| 10   | 10   |
| 11   | 11   |
| 12   | 12   |
| 11   | 11   |
| 9.5  | 9.5  |
| 11   | 11   |
| 11   | 11   |
| 11.5 | 11.5 |
| 11   | 11   |



|    |    |
|----|----|
| 9  | 9  |
| 9  | 9  |
| 10 | 10 |
| 10 | 10 |
| 10 | 10 |
| 8  | 8  |
| 9  | 9  |
| 10 | 10 |
| 10 | 10 |
| 9  | 9  |
| 11 | 11 |
| 10 | 10 |
| 10 | 10 |
| 9  | 9  |
| 9  | 9  |
| 10 | 10 |
| 10 | 10 |
| 9  | 9  |
| 10 | 10 |
| 10 | 10 |
| 8  | 8  |
| 10 | 10 |
| 9  | 9  |
| 10 | 10 |
| 10 | 10 |
| 10 | 10 |
| 11 | 11 |
| 8  | 8  |

|       |       |
|-------|-------|
| 11    | 11    |
| 9.5   | 9.5   |
| 9     | 9     |
| 9     | 9     |
| 7.5   | 7.5   |
| 11    | 11    |
| 12    | 12    |
| 11    | 11    |
| 8     | 8     |
| 11    | 11    |
| 6     | 6     |
| 9     | 9     |
| 10    | 10    |
| 9     | 9     |
| 12    | 12    |
| 10    | 10    |
| 10    | 10    |
| 9     | 9     |
| 10    | 10    |
| 8     | 8     |
| 11    | 11    |
| 9     | 9     |
| 11.75 | 11.75 |
| 9     | 9     |
| 9.5   | 9.5   |
| 9     | 9     |
| 10    | 10    |
| 9     | 9     |

|      |      |
|------|------|
| 9    | 9    |
| 8    | 8    |
| 10   | 10   |
| 11   | 11   |
| 10   | 10   |
| 10   | 10   |
| 8    | 8    |
| 9.5  | 9.5  |
| 10   | 10   |
| 8.5  | 8.5  |
| 9.5  | 9.5  |
| 9    | 9    |
| 10.5 | 10.5 |
| 9    | 9    |
| 8.5  | 8.5  |
| 10   | 10   |
| 9    | 9    |
| 11.5 | 11.5 |
| 10   | 10   |
| 11   | 11   |
| 10   | 10   |
| 10.5 | 10.5 |
| 7.5  | 7.5  |
| 10.5 | 10.5 |
| 11   | 11   |
| 10   | 10   |
| 9    | 9    |
| 10   | 10   |

|      |      |
|------|------|
| 10   | 10   |
| 10   | 10   |
| 9    | 9    |
| 7    | 7    |
| 8.5  | 8.5  |
| 10   | 10   |
| 9    | 9    |
| 10   | 10   |
| 10   | 10   |
| 10   | 10   |
| 10   | 10   |
| 8    | 8    |
| 9.5  | 9.5  |
| 9    | 9    |
| 8    | 8    |
| 10.5 | 10.5 |
| 9    | 9    |
| 9.5  | 9.5  |
| 8.5  | 8.5  |
| 10   | 10   |
| 9    | 9    |
| 9.5  | 9.5  |
| 9    | 9    |
| 7.5  | 7.5  |
| 6    | 6    |
| 12   | 12   |
| 11   | 11   |
| 10   | 10   |

|      |      |
|------|------|
| 11   | 11   |
| 7    | 7    |
| 10   | 10   |
| 9.5  | 9.5  |
| 8.5  | 8.5  |
| 9    | 9    |
| 8    | 8    |
| 9.5  | 9.5  |
| 8    | 8    |
| 10   | 10   |
| 6.5  | 6.5  |
| 10   | 10   |
| 11   | 11   |
| 9    | 9    |
| 10   | 10   |
| 9.5  | 9.5  |
| 10.5 | 10.5 |
| 7.5  | 7.5  |
| 8    | 8    |
| 7.5  | 7.5  |
| 10   | 10   |
| 11   | 11   |
| 10   | 10   |
| 13   | 13   |
| 10   | 10   |
| 9    | 9    |
| 9    | 9    |
| 12   | 12   |

|      |      |
|------|------|
| 7    | 7    |
| 5.5  | 5.5  |
| 8.5  | 8.5  |
|      |      |
| 10.5 | 10.5 |
| 8    | 8    |
| 10   | 10   |
| 11   | 11   |
| 9    | 9    |
| 8    | 8    |
| 8.5  | 8.5  |
| 9.5  | 9.5  |
| 11   | 11   |
| 8    | 8    |
| 10   | 10   |
| 9    | 9    |
| 10.5 | 10.5 |
| 9.5  | 9.5  |
| 8    | 8    |
| 9    | 9    |
| 11   | 11   |
| 10   | 10   |
| 8    | 8    |
| 7    | 7    |
| 9    | 9    |
| 10   | 10   |
| 8.5  | 8.5  |
| 11.5 | 11.5 |

|      |      |
|------|------|
| 9.5  | 9.5  |
| 10   | 10   |
| 7    | 7    |
| 8    | 8    |
| 8    | 8    |
| 10   | 10   |
| 9    | 9    |
| 9    | 9    |
| 8.5  | 8.5  |
| 9.5  | 9.5  |
| 8    | 8    |
| 10   | 10   |
| 10   | 10   |
| 10   | 10   |
| 8.5  | 8.5  |
| 9    | 9    |
| 9.5  | 9.5  |
| 9    | 9    |
| 8    | 8    |
| 9.5  | 9.5  |
| 10   | 10   |
| 8    | 8    |
| 7.75 | 7.75 |
| 11   | 11   |
| 11   | 11   |
| 8.5  | 8.5  |
| 9    | 9    |
| 8.5  | 8.5  |

|     |     |
|-----|-----|
| 9   | 9   |
| 9   | 9   |
| 8   | 8   |
| 7.5 | 7.5 |
| 10  | 10  |
| 9.5 | 9.5 |
| 10  | 10  |
| 10  | 10  |
| 8   | 8   |
| 8.5 | 8.5 |
|     |     |
| 6   | 6   |
| 10  | 10  |
| 8   | 8   |
| 9   | 9   |
| 6   | 6   |
| 9   | 9   |
| 8   | 8   |
| 9.5 | 9.5 |
| 8   | 8   |
| 10  | 10  |
| 10  | 10  |
| 8   | 8   |
| 9   | 9   |
| 5.5 | 5.5 |
| 10  | 10  |
| 9   | 9   |
| 11  | 11  |



|      |      |
|------|------|
| 9.5  | 9.5  |
| 7.5  | 7.5  |
| 10   | 10   |
| 8    | 8    |
| 8.5  | 8.5  |
| 10   | 10   |
| 10.5 | 10.5 |
| 9.5  | 9.5  |
| 11   | 11   |
| 9.5  | 9.5  |
| 10   | 10   |
| 9    | 9    |
| 10   | 10   |
| 11.5 | 11.5 |
|      |      |
| 12   | 12   |
| 10   | 10   |
| 9    | 9    |
| 7    | 7    |
| 8    | 8    |
| 11   | 11   |
| 8    | 8    |
| 9    | 9    |
| 10   | 10   |
| 8.5  | 8.5  |
| 10.5 | 10.5 |
| 9    | 9    |
| 10.5 | 10.5 |

|     |     |
|-----|-----|
| 8   | 8   |
| 10  | 10  |
| 9.5 | 9.5 |
| 10  | 10  |
| 9   | 9   |
| 10  | 10  |
| 10  | 10  |
| 9   | 9   |
| 8   | 8   |
| 9   | 9   |
| 9.5 | 9.5 |
| 8.5 | 8.5 |
| 10  | 10  |
| 8.5 | 8.5 |
| 10  | 10  |
| 11  | 11  |
| 9   | 9   |
| 9   | 9   |
| 10  | 10  |
| 9   | 9   |
| 7   | 7   |
| 10  | 10  |
| 9   | 9   |
| 10  | 10  |
| 8.5 | 8.5 |
| 9.5 | 9.5 |
| 9   | 9   |
| 8.5 | 8.5 |

|      |      |
|------|------|
| 11   | 11   |
| 9    | 9    |
| 9.5  | 9.5  |
| 9.5  | 9.5  |
| 10   | 10   |
| 10.5 | 10.5 |
| 9    | 9    |
| 11   | 11   |
| 12   | 12   |
| 9    | 9    |
| 10   | 10   |
| 10   | 10   |
| 8    | 8    |
| 8    | 8    |
| 8    | 8    |
| 7    | 7    |
| 8    | 8    |
| 10   | 10   |
| 7    | 7    |
| 9.5  | 9.5  |
| 9    | 9    |
| 8    | 8    |
| 7    | 7    |
| 10   | 10   |
| 8.5  | 8.5  |
| 9    | 9    |
| 9    | 9    |
| 8    | 8    |

|      |      |
|------|------|
| 9    | 9    |
| 9    | 9    |
| 11   | 11   |
| 9.5  | 9.5  |
| 10   | 10   |
| 10   | 10   |
| 6    | 6    |
| 6    | 6    |
| 8    | 8    |
| 10   | 10   |
| 8    | 8    |
| 9    | 9    |
| 8.5  | 8.5  |
| 10   | 10   |
| 10   | 10   |
| 9    | 9    |
| 9.5  | 9.5  |
| 10   | 10   |
| 10   | 10   |
| 10   | 10   |
| 9    | 9    |
| 10   | 10   |
| 10   | 10   |
| 10   | 10   |
| 10.5 | 10.5 |
| 9.5  | 9.5  |
| 9.5  | 9.5  |
| 9    | 9    |

|     |     |
|-----|-----|
| 11  | 11  |
| 7   | 7   |
| 11  | 11  |
| 9   | 9   |
| 9   | 9   |
| 11  | 11  |
| 9   | 9   |
| 10  | 10  |
| 9   | 9   |
| 9   | 9   |
| 9   | 9   |
| 11  | 11  |
| 9   | 9   |
| 6   | 6   |
| 11  | 11  |
| 10  | 10  |
|     |     |
| 9   | 9   |
| 9.5 | 9.5 |
| 8   | 8   |
| 9   | 9   |
| 10  | 10  |
| 10  | 10  |
| 8   | 8   |
| 8   | 8   |
| 10  | 10  |
| 10  | 10  |
| 7.5 | 7.5 |

|      |      |
|------|------|
| 10   | 10   |
| 10   | 10   |
| 10.5 | 10.5 |
| 11.5 | 11.5 |
| 10   | 10   |
|      |      |
| 9    | 9    |
| 8    | 8    |
| 10   | 10   |
| 8    | 8    |
| 10   | 10   |
| 8    | 8    |
| 7.5  | 7.5  |
| 9    | 9    |
| 8.75 | 8.75 |
| 8    | 8    |
| 10   | 10   |
| 10.5 | 10.5 |
| 8    | 8    |
| 4    | 4    |
| 10   | 10   |
| 10   | 10   |
| 10   | 10   |
| 9.5  | 9.5  |
| 8.5  | 8.5  |
| 11   | 11   |
| 11   | 11   |
| 8    | 8    |

|      |      |
|------|------|
| 10   | 10   |
| 8.5  | 8.5  |
| 9    | 9    |
| 6    | 6    |
| 8.5  | 8.5  |
| 8    | 8    |
| 11   | 11   |
| 10   | 10   |
| 10   | 10   |
| 9    | 9    |
| 10   | 10   |
| 10   | 10   |
| 6    | 6    |
| 10   | 10   |
| 10   | 10   |
| 11   | 11   |
| 9    | 9    |
| 10.5 | 10.5 |
| 8.5  | 8.5  |
| 10   | 10   |
| 7    | 7    |
| 10   | 10   |
| 10   | 10   |
| 12   | 12   |
| 8    | 8    |
| 10   | 10   |
| 10   | 10   |
| 7.5  | 7.5  |

|        |      |
|--------|------|
| 7      | 7    |
| 9      | 9    |
| 11     | 11   |
| 8      | 8    |
| 7      | 7    |
| 10.5   | 10.5 |
| 10     | 10   |
| 9      | 9    |
| 10     | 10   |
| 10     | 10   |
| 8      | 8    |
| 9      | 9    |
| 11     | 11   |
| 8      | 8    |
| 10-Sep | 9.5  |
| 9.5    | 9.5  |
| 10.5   | 10.5 |
| 10     | 10   |
| 10     | 10   |
| 10     | 10   |
| 10     | 10   |
| 11     | 11   |
| 9.5    | 9.5  |
| 10     | 10   |
| 9      | 9    |
| 9.5    | 9.5  |
| 10     | 10   |
| 9      | 9    |



|         |      |
|---------|------|
| 9.5     | 9.5  |
| 10      | 10   |
| 9.5     | 9.5  |
| 9.5     | 9.5  |
| 10      | 10   |
| 8       | 8    |
| 11      | 11   |
| 9.5     | 9.5  |
| 11 hrs  | 11   |
| 8       | 8    |
| 11      | 11   |
| 11      | 11   |
| 10      | 10   |
| 6       | 6    |
| 11      | 11   |
| 8       | 8    |
| 9       | 9    |
| 10.5    | 10.5 |
| 9       | 9    |
| 10      | 10   |
| 10      | 10   |
| 10.5    | 10.5 |
| 10      | 10   |
| 8       | 8    |
| 8 hours | 8    |
| 9.5     | 9.5  |
| 10      | 10   |
| 10      | 10   |

|      |      |
|------|------|
| 9    | 9    |
| 8    | 8    |
| 8    | 8    |
| 9    | 9    |
| 7    | 7    |
| 10   | 10   |
| 10   | 10   |
| 9    | 9    |
| 10   | 10   |
| 10   | 10   |
| 10   | 10   |
| 9    | 9    |
| 10   | 10   |
| 8    | 8    |
| 9    | 9    |
| 10   | 10   |
| 9    | 9    |
| 10   | 10   |
| 10   | 10   |
| 9    | 9    |
| 10.5 | 10.5 |
| 11   | 11   |
| 12   | 12   |
| 9.5  | 9.5  |
| 8    | 8    |
| 9.5  | 9.5  |
| 10   | 10   |
| 8    | 8    |

|      |      |
|------|------|
| 11   | 11   |
| 9    | 9    |
| 9.5  | 9.5  |
| 6    | 6    |
| 9.5  | 9.5  |
| 6.5  | 6.5  |
| 9    | 9    |
| 10   | 10   |
| 9    | 9    |
| 10   | 10   |
| 8    | 8    |
| 8    | 8    |
| 8    | 8    |
| 11   | 11   |
| 8    | 8    |
| 10   | 10   |
| 10.5 | 10.5 |
| 10   | 10   |
| 11   | 11   |
| 9    | 9    |
| 9    | 9    |
| 8.5  | 8.5  |
| 8    | 8    |
| 9    | 9    |
| 11   | 11   |
| 10   | 10   |
| 8.5  | 8.5  |
| 10   | 10   |

|      |      |
|------|------|
| 10.5 | 10.5 |
| 9    | 9    |
| 9.5  | 9.5  |
| 9.5  | 9.5  |
| 8    | 8    |
| 9    | 9    |
| 9    | 9    |
| 10   | 10   |
| 9.5  | 9.5  |
| 7    | 7    |
| 9    | 9    |
| 9    | 9    |
| 9.5  | 9.5  |
| 10   | 10   |
| 10.5 | 10.5 |
|      |      |
| 10   | 10   |
| 8.5  | 8.5  |
| 10.5 | 10.5 |
| 8    | 8    |
| 9    | 9    |
| 8    | 8    |
| 9    | 9    |
| 10   | 10   |
| 10   | 10   |
| 10   | 10   |
| 10   | 10   |
| 9    | 9    |

|      |      |
|------|------|
| 10   | 10   |
| 6    | 6    |
| 10   | 10   |
| 7    | 7    |
| 9.5  | 9.5  |
| 9    | 9    |
| 9.5  | 9.5  |
| 8    | 8    |
| 9    | 9    |
| 12   | 12   |
| 9    | 9    |
| 11   | 11   |
| 7    | 7    |
| 8    | 8    |
| 11   | 11   |
| 8    | 8    |
| 8.5  | 8.5  |
| 9    | 9    |
| 9.5  | 9.5  |
| 10.5 | 10.5 |
| 9    | 9    |
| 8    | 8    |
| 8    | 8    |
| 10   | 10   |
| 9    | 9    |
| 10   | 10   |
| 10   | 10   |
| 8    | 8    |

|      |      |
|------|------|
| 9    | 9    |
| 9    | 9    |
| 10.5 | 10.5 |
| 9.5  | 9.5  |
| 9    | 9    |
| 10   | 10   |
| 9    | 9    |
| 7    | 7    |
| 9    | 9    |
| 11   | 11   |
| 8.5  | 8.5  |
| 3.5  | 3.5  |
| 8    | 8    |
| 4    | 4    |
| 11   | 11   |
| 11   | 11   |
| 6    | 6    |
| 11   | 11   |
| 8    | 8    |
| 9    | 9    |
| 9.5  | 9.5  |
| 9    | 9    |
| 7    | 7    |
| 10   | 10   |
| 9.5  | 9.5  |
| 9.5  | 9.5  |
| 10   | 10   |
| 8.5  | 8.5  |

|      |      |
|------|------|
| 9.5  | 9.5  |
| 10   | 10   |
| 10.5 | 10.5 |
| 12   | 12   |
| 10.5 | 10.5 |
| 6    | 6    |
| 10   | 10   |
| 8.5  | 8.5  |
| 11   | 11   |
| 9    | 9    |
| 10   | 10   |
| 9    | 9    |
| 9.5  | 9.5  |
| 7.5  | 7.5  |
| 5    | 5    |
| 10   | 10   |
| 11.5 | 11.5 |
| 9    | 9    |
| 8    | 8    |
| 8    | 8    |
| 10.5 | 10.5 |
| 8.5  | 8.5  |
| 11   | 11   |
| 8    | 8    |
| 11   | 11   |
| 8.5  | 8.5  |
| 10   | 10   |
| 10   | 10   |

|      |      |
|------|------|
| 11   | 11   |
| 10   | 10   |
| 8    | 8    |
| 10   | 10   |
| 10.5 | 10.5 |
| 12   | 12   |
| 9    | 9    |
| 8    | 8    |
| 9    | 9    |
| 11   | 11   |
| 7.5  | 7.5  |
| 10.5 | 10.5 |
| 9    | 9    |
| 10   | 10   |
|      |      |
| 10.5 | 10.5 |
| 10.5 | 10.5 |
| 10.5 | 10.5 |
| 8    | 8    |
| 9.5  | 9.5  |
| 9    | 9    |
| 7    | 7    |
| 10   | 10   |
| 9    | 9    |
| 10.5 | 10.5 |
| 9    | 9    |
| 10   | 10   |
| 11.5 | 11.5 |



|      |      |
|------|------|
| 9    | 9    |
| 8    | 8    |
| 9.5  | 9.5  |
| 9    | 9    |
| 10   | 10   |
| 10   | 10   |
| 11   | 11   |
| 11   | 11   |
| 10   | 10   |
| 10   | 10   |
| 8    | 8    |
| 10.5 | 10.5 |
| 10   | 10   |
| 9    | 9    |
| 10   | 10   |
| 8    | 8    |
| 11   | 11   |
| 10   | 10   |
| 10   | 10   |
| 11.5 | 11.5 |
| 10   | 10   |
| 9    | 9    |
| 10.5 | 10.5 |
| 9    | 9    |
| 9.5  | 9.5  |
| 11.5 | 11.5 |
| 11   | 11   |
| 9    | 9    |

|      |      |
|------|------|
| 11   | 11   |
| 10   | 10   |
| 8    | 8    |
| 10   | 10   |
| 11   | 11   |
| 10   | 10   |
| 11   | 11   |
| 10   | 10   |
| 10.5 | 10.5 |
| 9.5  | 9.5  |
| 9.5  | 9.5  |
| 10   | 10   |
| 10   | 10   |
| 8.5  | 8.5  |
| 11   | 11   |
| 8    | 8    |
| 10.5 | 10.5 |
| 9.5  | 9.5  |
| 9.5  | 9.5  |
| 11   | 11   |
| 10   | 10   |
| 8    | 8    |
| 7.5  | 7.5  |
| 9    | 9    |
| 10   | 10   |
| 9.5  | 9.5  |
| 9.5  | 9.5  |
| 11   | 11   |

|     |     |
|-----|-----|
| 10  | 10  |
| 8   | 8   |
| 7   | 7   |
| 9   | 9   |
| 10  | 10  |
| 10  | 10  |
| 11  | 11  |
| 9.5 | 9.5 |
| 10  | 10  |
| 11  | 11  |
| 7.5 | 7.5 |
| 10  | 10  |
| 10  | 10  |
| 8   | 8   |
| 10  | 10  |
| 10  | 10  |
| 10  | 10  |
| 11  | 11  |
| 11  | 11  |
| 8   | 8   |
| 9   | 9   |
| 8.5 | 8.5 |
| 7   | 7   |
| 9   | 9   |
| 11  | 11  |
| 9   | 9   |
| 8   | 8   |
| 10  | 10  |

|     |     |
|-----|-----|
| 9.5 | 9.5 |
| 8   | 8   |
| 8   | 8   |
| 9   | 9   |
| 11  | 11  |
| 5   | 5   |
| 10  | 10  |
| 9   | 9   |
| 10  | 10  |
| 10  | 10  |
| 10  | 10  |
| 8   | 8   |
| 9   | 9   |
| 10  | 10  |
| 9.5 | 9.5 |
| 10  | 10  |
| 11  | 11  |
| 9.5 | 9.5 |
| 11  | 11  |
| 9   | 9   |
| 9   | 9   |
| 8   | 8   |
| 8   | 8   |
| 12  | 12  |
| 9   | 9   |
| 10  | 10  |
| 9.5 | 9.5 |
| 10  | 10  |

|      |      |
|------|------|
| 8    | 8    |
| 9    | 9    |
| 8    | 8    |
| 10   | 10   |
| 9    | 9    |
| 7    | 7    |
| 9.5  | 9.5  |
| 9    | 9    |
| 8    | 8    |
| 10   | 10   |
| 8    | 8    |
| 8.5  | 8.5  |
| 9    | 9    |
| 11   | 11   |
| 8.5  | 8.5  |
| 11   | 11   |
| 10   | 10   |
| 10   | 10   |
| 10   | 10   |
| 8    | 8    |
| 8.5  | 8.5  |
| 8    | 8    |
| 10.5 | 10.5 |
| 4.5  | 4.5  |
| 10   | 10   |
| 8    | 8    |
| 10   | 10   |
| 9.5  | 9.5  |

|      |      |
|------|------|
| 10.5 | 10.5 |
| 10   | 10   |
| 8.5  | 8.5  |
| 10   | 10   |
| 11   | 11   |
| 9.5  | 9.5  |
| 9    | 9    |
| 9.5  | 9.5  |
| 8    | 8    |
| 9    | 9    |
| 12   | 12   |
| 10.5 | 10.5 |
| 10.5 | 10.5 |
| 6    | 6    |
| 8    | 8    |
| 10.5 | 10.5 |
| 8    | 8    |
| 9    | 9    |
| 5    | 5    |
| 10   | 10   |
| 9    | 9    |
| 10   | 10   |
| 9.5  | 9.5  |
| 8.5  | 8.5  |
| 8.5  | 8.5  |
| 6    | 6    |
| 10   | 10   |
| 8    | 8    |

|      |      |
|------|------|
| 10   | 10   |
| 8    | 8    |
| 10   | 10   |
| 8.5  | 8.5  |
| 10.5 | 10.5 |
|      |      |
| 10.5 | 10.5 |
| 10   | 10   |
| 5.5  | 5.5  |
| 8    | 8    |
| 11   | 11   |
| 10   | 10   |
| 9.75 | 9.75 |
| 10   | 10   |
| 10   | 10   |
| 11   | 11   |
| 8    | 8    |
| 11   | 11   |
| 8.5  | 8.5  |
| 9    | 9    |
| 10.5 | 10.5 |
| 9    | 9    |
| 4    | 4    |
| 10   | 10   |
| 8    | 8    |
| 10.5 | 10.5 |
| 12   | 12   |
| 8    | 8    |

|      |      |
|------|------|
| 10   | 10   |
| 8    | 8    |
| 10   | 10   |
| 8    | 8    |
| 10   | 10   |
| 9.5  | 9.5  |
| 6    | 6    |
| 7    | 7    |
| 7    | 7    |
| 11.5 | 11.5 |
| 8    | 8    |
| 8    | 8    |
| 11   | 11   |
| 10   | 10   |
| 9    | 9    |
| 12   | 12   |
| 11   | 11   |
| 9    | 9    |
| 10   | 10   |
| 9    | 9    |
| 8    | 8    |
| 8    | 8    |
| 7    | 7    |
| 10   | 10   |
| 9    | 9    |
| 8.5  | 8.5  |
| 8    | 8    |
| 9    | 9    |



|     |     |
|-----|-----|
| 6   | 6   |
| 8   | 8   |
| 8   | 8   |
| 8   | 8   |
| 10  | 10  |
| 8   | 8   |
| 11  | 11  |
| 10  | 10  |
| 6   | 6   |
| 10  | 10  |
| 11  | 11  |
| 8   | 8   |
| 8   | 8   |
| 8   | 8   |
| 8   | 8   |
| 10  | 10  |
| 11  | 11  |
| 8   | 8   |
| 7.5 | 7.5 |
| 11  | 11  |
| 8.5 | 8.5 |
| 8   | 8   |
|     |     |
| 8   | 8   |
| 9   | 9   |
| 10  | 10  |
| 9   | 9   |
| 10  | 10  |

|      |      |
|------|------|
|      |      |
| 10   | 10   |
| 10   | 10   |
| 5    | 5    |
| 9    | 9    |
| 10   | 10   |
| 9.5  | 9.5  |
| 10   | 10   |
| 10   | 10   |
| 7.5  | 7.5  |
| 9    | 9    |
| 10   | 10   |
| 10   | 10   |
| 10.5 | 10.5 |
| 10   | 10   |
| 10   | 10   |
| 9    | 9    |
| 9    | 9    |
| 8    | 8    |
| 8    | 8    |
| 10.5 | 10.5 |
| 10   | 10   |
| 9    | 9    |
| 11   | 11   |
| 9.5  | 9.5  |
| 10   | 10   |
| 10   | 10   |
| 10   | 10   |

|      |      |
|------|------|
| 9.5  | 9.5  |
| 10   | 10   |
| 12   | 12   |
| 8    | 8    |
| 9    | 9    |
| 10   | 10   |
| 9    | 9    |
| 6    | 6    |
| 12   | 12   |
| 7.5  | 7.5  |
| 9.5  | 9.5  |
| 10   | 10   |
| 8    | 8    |
| 10   | 10   |
| 10   | 10   |
| 10   | 10   |
| 9    | 9    |
| 10   | 10   |
| 10   | 10   |
| 9    | 9    |
| 9.5  | 9.5  |
| 10   | 10   |
| 10.5 | 10.5 |
| 9.5  | 9.5  |
| 9.5  | 9.5  |
| 8    | 8    |
| 9    | 9    |
| 12   | 12   |

|     |     |
|-----|-----|
| 9   | 9   |
| 9.5 | 9.5 |
| 8   | 8   |
| 8   | 8   |
| 8   | 8   |
| 9   | 9   |
| 11  | 11  |
| 9   | 9   |
| 8   | 8   |
| 9.5 | 9.5 |
| 11  | 11  |
| 9   | 9   |
| 8   | 8   |
| 9   | 9   |
| 9   | 9   |
| 10  | 10  |
| 10  | 10  |
| 10  | 10  |
| 8.5 | 8.5 |
| 10  | 10  |
| 8.5 | 8.5 |
| 9   | 9   |
| 8   | 8   |
| 10  | 10  |
| 10  | 10  |
| 9.5 | 9.5 |
| 7   | 7   |
| 8.5 | 8.5 |

|      |      |
|------|------|
| 8    | 8    |
| 6    | 6    |
| 8    | 8    |
| 9    | 9    |
| 10   | 10   |
| 10.5 | 10.5 |
| 10   | 10   |
| 8    | 8    |
| 10   | 10   |
| 9    | 9    |
| 10   | 10   |
| 11   | 11   |
| 7    | 7    |
| 9    | 9    |
| 9    | 9    |
| 11   | 11   |
| 8    | 8    |
| 8    | 8    |
| 9    | 9    |
| 12.5 | 12.5 |
| 10   | 10   |
| 9    | 9    |
| 7    | 7    |
| 9.5  | 9.5  |
| 9    | 9    |
| 7.5  | 7.5  |
| 10   | 10   |
| 9.5  | 9.5  |

|      |      |
|------|------|
| 9.5  | 9.5  |
| 6    | 6    |
| 9    | 9    |
| 10.5 | 10.5 |
| 10   | 10   |
| 10   | 10   |
| 10   | 10   |
| 10   | 10   |
| 11   | 11   |
| 11   | 11   |
| 10   | 10   |
| 6.5  | 6.5  |
| 10   | 10   |
| 8.5  | 8.5  |
| 8    | 8    |
| 8    | 8    |
| 8.5  | 8.5  |
| 12   | 12   |
| 8    | 8    |
| 9.5  | 9.5  |
| 10   | 10   |
| 10   | 10   |
| 9    | 9    |
| 10   | 10   |
| 9.5  | 9.5  |
| 10.5 | 10.5 |
| 10   | 10   |
| 10   | 10   |

|     |     |
|-----|-----|
| 9.5 | 9.5 |
| 10  | 10  |
|     |     |
| 8   | 8   |
| 11  | 11  |
| 11  | 11  |
| 9   | 9   |
| 9   | 9   |
| 9   | 9   |
| 7   | 7   |
| 11  | 11  |
|     |     |
| 10  | 10  |
| 12  | 12  |
| 8   | 8   |
| 9   | 9   |
| 10  | 10  |
| 10  | 10  |
| 11  | 11  |
| 9   | 9   |
| 9   | 9   |
| 10  | 10  |
| 6.5 | 6.5 |
| 9   | 9   |
| 9.5 | 9.5 |
| 10  | 10  |
| 7.5 | 7.5 |
| 10  | 10  |

|      |      |
|------|------|
| 9    | 9    |
| 9.5  | 9.5  |
| 10   | 10   |
| 9.5  | 9.5  |
| 10.5 | 10.5 |
| 11   | 11   |
| 7    | 7    |
| 10   | 10   |
| 10   | 10   |
| 10   | 10   |
| 8    | 8    |
| 9    | 9    |
| 9    | 9    |
| 12   | 12   |
| 9.5  | 9.5  |
| 9    | 9    |
| 10.5 | 10.5 |
|      |      |
| 10   | 10   |
| 11   | 11   |
| 8    | 8    |
| 10.5 | 10.5 |
| 7    | 7    |
| 10   | 10   |
| 10   | 10   |
| 7    | 7    |
| 11   | 11   |
| 8    | 8    |



|      |      |
|------|------|
| 10   | 10   |
| 10.5 | 10.5 |
| 9    | 9    |
| 10   | 10   |
| 8    | 8    |
| 9    | 9    |
| 10   | 10   |
| 10   | 10   |
| 8    | 8    |
| 8    | 8    |
| 10   | 10   |
| 10   | 10   |
| 8    | 8    |
| 12   | 12   |
| 8    | 8    |
| 8.5  | 8.5  |
| 10   | 10   |
| 10   | 10   |
| 9    | 9    |
| 10   | 10   |
| 10   | 10   |
| 10   | 10   |
| 8    | 8    |
| 12   | 12   |
| 7    | 7    |
| 9    | 9    |
| 10   | 10   |
| 9    | 9    |

|      |      |
|------|------|
| 9    | 9    |
| 9    | 9    |
| 10   | 10   |
| 12   | 12   |
| 8    | 8    |
| 10   | 10   |
| 9    | 9    |
| 9.5  | 9.5  |
| 8    | 8    |
| 8.5  | 8.5  |
| 10.5 | 10.5 |
| 8    | 8    |
| 10.5 | 10.5 |
| 10   | 10   |
| 10   | 10   |
| 10   | 10   |
| 8.5  | 8.5  |
| 9    | 9    |
| 9    | 9    |
| 10   | 10   |
| 10   | 10   |
| 10   | 10   |
| 10   | 10   |
| 9.5  | 9.5  |
| 7    | 7    |
| 12   | 12   |
| 10   | 10   |
| 12   | 12   |

|      |      |
|------|------|
| 9    | 9    |
| 9    | 9    |
| 8    | 8    |
| 9    | 9    |
| 10   | 10   |
| 10   | 10   |
| 10   | 10   |
| 8.5  | 8.5  |
| 8    | 8    |
|      |      |
| 9.5  | 9.5  |
| 8    | 8    |
| 8    | 8    |
| 6    | 6    |
| 8    | 8    |
| 11.5 | 11.5 |
| 11   | 11   |
| 9    | 9    |
| 10   | 10   |
|      |      |
| 8    | 8    |
| 8    | 8    |
| 10   | 10   |
| 9    | 9    |
| 9.5  | 9.5  |
| 10   | 10   |
| 9    | 9    |
| 9    | 9    |

|      |      |
|------|------|
| 10.5 | 10.5 |
| 10   | 10   |
| 10   | 10   |
| 11   | 11   |
| 9    | 9    |
|      |      |
| 9    | 9    |
| 10.5 | 10.5 |
| 9.5  | 9.5  |
| 8    | 8    |
| 10.5 | 10.5 |
| 9    | 9    |
| 8.5  | 8.5  |
| 9    | 9    |
| 7.5  | 7.5  |
| 9    | 9    |
| 10   | 10   |
| 11.5 | 11.5 |
| 9    | 9    |
| 10.5 | 10.5 |
| 9    | 9    |
| 8    | 8    |
| 9    | 9    |
| 8.5  | 8.5  |
| 10   | 10   |
| 8.5  | 8.5  |
| 9    | 9    |
| 8.5  | 8.5  |

|     |     |
|-----|-----|
| 8   | 8   |
| 8.5 | 8.5 |
| 11  | 11  |
| 8.5 | 8.5 |
| 7.5 | 7.5 |
| 10  | 10  |
| 7   | 7   |
| 9   | 9   |
| 10  | 10  |
| 12  | 12  |
| 9   | 9   |
| 9   | 9   |
| 8.5 | 8.5 |
| 9   | 9   |
| 10  | 10  |
| 13  | 13  |
| 11  | 11  |
| 8   | 8   |
| 10  | 10  |
| 10  | 10  |
| 11  | 11  |
| 10  | 10  |
| 5   | 5   |
| 9   | 9   |
| 6.5 | 6.5 |
| 11  | 11  |
| 11  | 11  |
| 10  | 10  |

|      |      |
|------|------|
| 8    | 8    |
| 8.5  | 8.5  |
| 8    | 8    |
| 10   | 10   |
| 9.25 | 9.25 |
| 10   | 10   |
| 10   | 10   |
| 9.5  | 9.5  |
| 8    | 8    |
| 10   | 10   |
| 9    | 9    |
| 9    | 9    |
| 10   | 10   |
| 9    | 9    |
| 7    | 7    |
| 10   | 10   |
| 8.5  | 8.5  |
| 8    | 8    |
| 9    | 9    |
| 9    | 9    |
| 10   | 10   |
| 5    | 5    |
| 10.5 | 10.5 |
| 10   | 10   |
| 8.5  | 8.5  |
| 9    | 9    |
| 9.5  | 9.5  |
| 7.5  | 7.5  |

|     |     |
|-----|-----|
| 9   | 9   |
| 8   | 8   |
| 8.5 | 8.5 |
| 8   | 8   |
| 8   | 8   |
| 9   | 9   |
| 8   | 8   |
| 8   | 8   |
| 10  | 10  |
| 8   | 8   |
| 9.5 | 9.5 |
| 7   | 7   |
| 10  | 10  |
| 11  | 11  |
| 9.5 | 9.5 |
| 10  | 10  |
| 10  | 10  |
| 10  | 10  |
| 7   | 7   |
| 8   | 8   |
| 8   | 8   |
| 10  | 10  |
| 6   | 6   |
| 9   | 9   |
| 9   | 9   |
| 8   | 8   |
| 8.5 | 8.5 |
| 9   | 9   |

|     |     |
|-----|-----|
| 9   | 9   |
| 8   | 8   |
| 10  | 10  |
| 7.5 | 7.5 |
| 7   | 7   |
| 10  | 10  |
| 9   | 9   |
| 10  | 10  |
| 11  | 11  |
| 11  | 11  |
| 9.5 | 9.5 |
| 8   | 8   |
| 8   | 8   |
| 7   | 7   |
| 10  | 10  |
| 6.5 | 6.5 |
| 8   | 8   |
| 9.5 | 9.5 |
| 9   | 9   |
| 10  | 10  |
| 8   | 8   |
| 9   | 9   |
| 12  | 12  |
| 9   | 9   |
| 6   | 6   |
| 10  | 10  |
| 8   | 8   |
| 6   | 6   |



|      |      |
|------|------|
| 9    | 9    |
| 8    | 8    |
| 10   | 10   |
| 7    | 7    |
| 11   | 11   |
| 9    | 9    |
| 7    | 7    |
| 10   | 10   |
| 9    | 9    |
| 6    | 6    |
| 8    | 8    |
| 10   | 10   |
| 10   | 10   |
| 9    | 9    |
| 5.5  | 5.5  |
| 11   | 11   |
| 10   | 10   |
| 10   | 10   |
| 11   | 11   |
| 9    | 9    |
| 7    | 7    |
| 11.5 | 11.5 |
| 8    | 8    |
| 9    | 9    |
| 9    | 9    |
| 8    | 8    |
| 8    | 8    |
| 8    | 8    |

|      |      |
|------|------|
| 9.5  | 9.5  |
| 8.5  | 8.5  |
| 8    | 8    |
| 9    | 9    |
| 9.5  | 9.5  |
| 7    | 7    |
| 9.5  | 9.5  |
| 9    | 9    |
| 9.5  | 9.5  |
| 10   | 10   |
| 12   | 12   |
| 10   | 10   |
|      |      |
| 8    | 8    |
| 9    | 9    |
| 10   | 10   |
| 9    | 9    |
| 9    | 9    |
| 9    | 9    |
| 9    | 9    |
| 6.5  | 6.5  |
| 10.5 | 10.5 |
| 7    | 7    |
| 10   | 10   |
| 9    | 9    |
| 11   | 11   |
| 11   | 11   |
| 9    | 9    |

|     |     |
|-----|-----|
| 10  | 10  |
| 8   | 8   |
| 10  | 10  |
| 8   | 8   |
| 10  | 10  |
| 8.5 | 8.5 |
| 8.5 | 8.5 |
| 9   | 9   |
| 9.5 | 9.5 |
| 9   | 9   |
| 8   | 8   |
| 8.5 | 8.5 |
| 9   | 9   |
| 10  | 10  |
| 9   | 9   |
| 11  | 11  |
| 11  | 11  |
| 6   | 6   |
| 9   | 9   |
| 11  | 11  |
| 10  | 10  |
| 10  | 10  |
| 6   | 6   |
| 9.5 | 9.5 |
| 8   | 8   |
| 10  | 10  |
| 8   | 8   |
| 9   | 9   |

|     |     |
|-----|-----|
| 9   | 9   |
| 10  | 10  |
| 9   | 9   |
| 11  | 11  |
| 9.5 | 9.5 |
| 8.5 | 8.5 |
| 10  | 10  |
| 8   | 8   |
| 10  | 10  |
| 8   | 8   |
| 8.5 | 8.5 |
| 10  | 10  |
| 10  | 10  |
| 10  | 10  |
| 7   | 7   |
| 9   | 9   |
| 8   | 8   |
| 10  | 10  |
| 8.5 | 8.5 |
| 6.5 | 6.5 |
| 3   | 3   |
| 6.5 | 6.5 |
| 10  | 10  |
| 9.5 | 9.5 |
| 7.5 | 7.5 |
| 8   | 8   |
| 8.5 | 8.5 |
| 10  | 10  |

|      |      |
|------|------|
| 10   | 10   |
| 10   | 10   |
| 10   | 10   |
| 11   | 11   |
| 9    | 9    |
| 9.5  | 9.5  |
| 8    | 8    |
| 11   | 11   |
| 7.5  | 7.5  |
| 9.5  | 9.5  |
| 9.5  | 9.5  |
| 10.5 | 10.5 |
| 8    | 8    |
| 9    | 9    |
| 9    | 9    |
| 7    | 7    |
| 8    | 8    |
| 10.5 | 10.5 |
| 9    | 9    |
| 11   | 11   |
| 10.5 | 10.5 |
| 10   | 10   |
| 7.5  | 7.5  |
| 9    | 9    |
| 9    | 9    |
| 9    | 9    |
| 10   | 10   |
| 8.5  | 8.5  |

|     |     |
|-----|-----|
| 7   | 7   |
| 11  | 11  |
| 8   | 8   |
| 9   | 9   |
| 11  | 11  |
| 9   | 9   |
| 10  | 10  |
| 9.5 | 9.5 |
| 7   | 7   |
| 7.5 | 7.5 |
|     |     |
| 10  | 10  |
|     |     |
| 8   | 8   |
| 8   | 8   |
| 8.5 | 8.5 |
| 10  | 10  |
| 8.5 | 8.5 |
| 9   | 9   |
| 10  | 10  |
| 11  | 11  |
| 9.5 | 9.5 |
| 8   | 8   |
| 11  | 11  |
| 10  | 10  |
|     |     |
| 9   | 9   |
| 9   | 9   |

|     |     |
|-----|-----|
| 8   | 8   |
| 9   | 9   |
| 10  | 10  |
| 9   | 9   |
| 10  | 10  |
| 7.5 | 7.5 |
| 11  | 11  |
| 8   | 8   |
| 10  | 10  |
| 6   | 6   |
| 10  | 10  |
| 9.5 | 9.5 |
| 9   | 9   |
| 10  | 10  |
|     |     |
| 7.5 | 7.5 |
| 10  | 10  |
| 8   | 8   |
| 7   | 7   |
| 8.5 | 8.5 |
| 9   | 9   |
| 11  | 11  |
| 10  | 10  |
| 10  | 10  |
| 10  | 10  |
| 9   | 9   |
| 9   | 9   |
| 10  | 10  |

|      |      |
|------|------|
| 8.5  | 8.5  |
| 9    | 9    |
| 9    | 9    |
| 9.5  | 9.5  |
| 8    | 8    |
|      |      |
| 9    | 9    |
| 10   | 10   |
| 5    | 5    |
| 11.5 | 11.5 |
| 10   | 10   |
| 11   | 11   |
| 9    | 9    |
| 8    | 8    |
| 12   | 12   |
| 9    | 9    |
| 9.5  | 9.5  |
| 8    | 8    |
| 11   | 11   |
| 10   | 10   |
| 9    | 9    |
| 8.5  | 8.5  |
| 11   | 11   |
| 9    | 9    |
| 9    | 9    |
